# Supplementary material for: Summary data-based mendelian randomization and single-cell RNA sequencing analyses identify key genes associated with ubiquitination in prostate cancer
Source: Research Square preprint supplement (doi:10.21203/rs.3.rs-7723484/v1), 2025-11-22
Supplement: Supplementary file 1 [file 34a862c3aad94ebf6a19af0e.xlsx]

## Sheet: GO
	ONTOLOGY	ID	Description	GeneRatio	BgRatio	pvalue	p.adjust	qvalue	geneID	Count
GO:0019787	MF	GO:0019787	ubiquitin-like protein transferase activity	134/434	465/18432	3.50110747644565e-111	1.54398839711253e-108	1.24934256264745e-108	HERC2/FBXW11/VHL/RNF213/CBL/TRIM36/RNF144A/UBE2E2/TRIM68/NEDD4L/SH3RF1/FBXO25/TRIM3/HECTD4/UBE2J1/TRIM37/LONRF2/FBXL5/RNF208/UBE2E3/NEDD4/DTX3/TRIM24/RNF187/KLHL20/NSMCE1/TRIM33/FBXO9/HLTF/TTC3/RANBP2/UBE2G1/RNF41/RNF144B/RLIM/DZIP3/TRIM27/RNF14/BARD1/STUB1/MYCBP2/HERC3/SYVN1/HERC5/TRIP12/RMND5A/KLHL9/UBE2Q2/PJA2/UHRF2/BTRC/PIAS4/LRSAM1/RNF141/TRAF3/ATG16L1/RNF13/HERC1/MALT1/UBE2L3/PIAS2/UBE2M/PE…	134
GO:0004842	MF	GO:0004842	ubiquitin-protein transferase activity	124/434	441/18432	7.39424933188842e-101	1.6304319776814e-98	1.31928974921588e-98	HERC2/FBXW11/VHL/RNF213/CBL/TRIM36/RNF144A/UBE2E2/TRIM68/NEDD4L/SH3RF1/FBXO25/TRIM3/HECTD4/UBE2J1/TRIM37/LONRF2/FBXL5/RNF208/UBE2E3/NEDD4/DTX3/TRIM24/RNF187/KLHL20/NSMCE1/TRIM33/FBXO9/HLTF/TTC3/UBE2G1/RNF41/RNF144B/RLIM/DZIP3/TRIM27/RNF14/BARD1/STUB1/MYCBP2/HERC3/SYVN1/HERC5/TRIP12/RMND5A/KLHL9/UBE2Q2/PJA2/UHRF2/BTRC/LRSAM1/RNF141/TRAF3/RNF13/HERC1/MALT1/UBE2L3/UBE2M/PELI2/RBX1/RNF185/CUL5/FBXW2/…	124
GO:0061659	MF	GO:0061659	ubiquitin-like protein ligase activity	91/434	334/18432	1.54089363195503e-71	2.26511363897389e-69	1.83285242537808e-69	HERC2/RNF213/CBL/RNF144A/TRIM68/NEDD4L/SH3RF1/TRIM3/TRIM37/LONRF2/RNF208/NEDD4/DTX3/TRIM24/RNF187/NSMCE1/HLTF/RANBP2/RNF41/RNF144B/RLIM/DZIP3/TRIM27/RNF14/STUB1/MYCBP2/HERC3/SYVN1/HERC5/TRIP12/RMND5A/UHRF2/BTRC/PIAS4/LRSAM1/RNF13/PIAS2/PELI2/RBX1/RNF185/TRIM73/WWP2/ANKIB1/CBX4/RFFL/XIAP/UFL1/RNF103/UBE2O/TRAF3IP2/HECTD2/BFAR/TRIM11/TRIM52/RNF34/RNF8/RNF220/SIAH1/ARIH1/RNF167/RBBP6/TRIM22/MUL1/FBX…	91
GO:0061630	MF	GO:0061630	ubiquitin protein ligase activity	86/434	322/18432	1.1240876865948e-66	1.23930667447077e-64	1.00280454146221e-64	HERC2/RNF213/CBL/RNF144A/TRIM68/NEDD4L/SH3RF1/TRIM3/TRIM37/LONRF2/RNF208/NEDD4/DTX3/TRIM24/RNF187/NSMCE1/HLTF/RNF41/RNF144B/RLIM/DZIP3/TRIM27/RNF14/STUB1/MYCBP2/HERC3/SYVN1/HERC5/TRIP12/RMND5A/UHRF2/BTRC/LRSAM1/RNF13/PELI2/RBX1/RNF185/TRIM73/WWP2/ANKIB1/RFFL/XIAP/RNF103/UBE2O/TRAF3IP2/HECTD2/BFAR/TRIM11/TRIM52/RNF34/RNF8/RNF220/SIAH1/ARIH1/RNF167/RBBP6/TRIM22/MUL1/FBXO6/RNF138/TRIM41/RNF180/RNF14…	86
GO:0000209	BP	GO:0000209	protein polyubiquitination	76/434	246/18903	7.11905789595492e-65	2.33789861303159e-61	1.99558433441347e-61	FBXW11/CDC27/UBE2V1/RNF213/CBL/RNF144A/UBE2E2/TRIM68/NEDD4L/TRIM3/UBE2J1/UBE2E3/NEDD4/RNF187/KLHL20/TTC3/UBE2G1/FBXL17/KBTBD7/RNF41/RNF144B/ANAPC13/FBXO28/WSB2/ANAPC5/DZIP3/TRIM27/RNF14/BARD1/STUB1/SYVN1/TRIP12/RMND5A/UBE2Q2/BTRC/LRSAM1/TRAF3/UBE2L3/UBE2V2/PELI2/RBX1/RNF185/WWP2/ANKIB1/UBE2R2/UBE2A/RFFL/XIAP/KLHL42/ZFP91/UBE2O/TRAF3IP2/BFAR/RNF34/RNF8/OTUB1/ARIH1/RNF167/TRIM22/MUL1/DDB2/GABARAP/R…	76
GO:0043161	BP	GO:0043161	proteasome-mediated ubiquitin-dependent protein catabolic process	85/434	450/18903	2.30833552727825e-53	3.79028693579089e-50	3.23531447849578e-50	HERC2/FBXW11/CDC27/CD2AP/SOCS4/RNF144A/NEDD4L/SH3RF1/FBXL8/TRIM3/UBE2J1/CUL4B/SPOPL/FBXL5/NEDD4/RNF187/KLHL20/FBXO9/KLHL22/UBE2G1/FBXL17/VCP/RAD23B/KBTBD7/FBXW5/RNF144B/ANAPC13/FBXL4/UBQLN1/ANAPC5/UBXN2B/SOCS5/BAG6/RNF14/STUB1/DCAF11/USP14/SYVN1/TRIP12/RMND5A/DDB1/KCTD2/BTRC/FBXO45/DNAJB2/TRPC4AP/RBX1/RNF185/CUL5/WWP2/ANKIB1/UCHL5/UBE2A/RFFL/UFL1/RNF103/KLHL42/TBL1XR1/FBXL15/KCTD10/BFAR/RNF34/SIA…	85
GO:0000151	CC	GO:0000151	ubiquitin ligase complex	70/437	309/19869	1.22310524075148e-50	4.74564833411575e-48	3.9783107304443e-48	FBXW11/CDC27/UBE2V1/RNF144A/FBXO25/FBXL8/CUL7/CUL4B/SPOPL/FBXL5/NEDD4/KLHL20/FBXO9/KLHL22/PCGF2/FBXL17/KBTBD7/FBXW5/FBXO42/RNF144B/DCAF6/ANAPC13/FBXL4/DCAF16/KLHL12/DCAF7/ANAPC5/USP47/USP33/KLHL8/RNF14/BARD1/STUB1/DCAF11/SYVN1/RMND5A/KLHL9/DDB1/KCTD2/BTRC/TRAF3/UBE2L3/FBXO45/TRPC4AP/RBX1/CUL5/WWP2/ANKIB1/CBX4/ATG3/UBE2A/KLHL42/FBXL15/KCTD10/DCAF5/UBAC1/RNF8/ARIH1/FBXO6/DDB2/GAN/RNF19A/RNF168/UBE2…	70
GO:0031461	CC	GO:0031461	cullin-RING ubiquitin ligase complex	44/437	178/19869	1.09097612144921e-33	2.11649367561146e-31	1.7742716922516e-31	FBXW11/CDC27/FBXO25/FBXL8/CUL7/CUL4B/SPOPL/FBXL5/KLHL20/FBXO9/KLHL22/FBXL17/KBTBD7/FBXW5/FBXO42/DCAF6/ANAPC13/FBXL4/DCAF16/KLHL12/DCAF7/ANAPC5/USP47/KLHL8/DCAF11/KLHL9/DDB1/KCTD2/BTRC/FBXO45/TRPC4AP/RBX1/CUL5/KLHL42/FBXL15/KCTD10/DCAF5/FBXO6/DDB2/GAN/UBE2S/FBXO2/ENC1/FBXW7	44
GO:0051865	BP	GO:0051865	protein autoubiquitination	28/434	80/18903	5.23247536427334e-26	5.72781636542455e-23	4.88915154212629e-23	RNF213/CBL/TRIM68/SH3RF1/TRIM37/RNF208/RNF187/RNF41/BARD1/STUB1/UHRF2/LRSAM1/RNF141/RNF13/RBX1/RNF185/WWP2/UBE2A/BFAR/TRIM52/RNF8/RNF220/DDB2/CNOT4/RNF19B/LTN1/MDM2/AMFR	28
GO:0032182	MF	GO:0032182	ubiquitin-like protein binding	32/434	116/18432	1.62951418544974e-25	1.43723151156667e-23	1.16295854498413e-23	HERC2/USP13/NEDD4/TOM1/FAAP20/N4BP2/TOM1L2/RAD23B/TAB3/DDI2/UBXN2B/USP25/STAM/TOM1L1/DNAJB2/TOLLIP/STAM2/RNF185/USPL1/CBX4/UBE2A/UBAP1/RNF8/FAF1/OTUB1/CUEDC1/RNF168/RNF19B/FBXW7/TNFAIP3/MDM2/AMFR	32
GO:0070646	BP	GO:0070646	protein modification by small protein removal	37/434	176/18903	4.0426092581314e-25	3.31898220092588e-22	2.83301801431682e-22	USP4/TNIP1/USP45/USP9Y/USP13/USP32/VCP/MINDY3/USP47/USP33/BARD1/USP14/USP22/USP25/STAMBP/SENP6/OTUD7B/USP39/USP38/USP42/USP10/USPL1/UCHL5/USP48/EIF3F/USP12/USP8/USP15/OTUB1/JOSD1/USP36/TAF5L/OTUD3/USP28/CYLD/TNFAIP3/ZC3H12A	37
GO:0016579	BP	GO:0016579	protein deubiquitination	35/434	158/18903	1.23765951113966e-24	8.1289476691653e-22	6.93871005929457e-22	USP4/TNIP1/USP45/USP9Y/USP13/USP32/VCP/MINDY3/USP47/USP33/BARD1/USP14/USP22/USP25/STAMBP/OTUD7B/USP39/USP38/USP42/USP10/UCHL5/USP48/EIF3F/USP12/USP8/USP15/OTUB1/JOSD1/USP36/TAF5L/OTUD3/USP28/CYLD/TNFAIP3/ZC3H12A	35
GO:0043130	MF	GO:0043130	ubiquitin binding	29/434	96/18432	1.74305052871611e-24	1.28114213860634e-22	1.03665636707853e-22	USP13/NEDD4/TOM1/FAAP20/N4BP2/TOM1L2/RAD23B/TAB3/DDI2/UBXN2B/USP25/STAM/TOM1L1/DNAJB2/TOLLIP/STAM2/RNF185/UBE2A/UBAP1/RNF8/FAF1/OTUB1/CUEDC1/RNF168/RNF19B/FBXW7/TNFAIP3/MDM2/AMFR	29
GO:0019783	MF	GO:0019783	ubiquitin-like protein peptidase activity	32/434	127/18432	3.66527541259235e-24	2.30912350993318e-22	1.86846370656963e-22	USP4/USP45/USP9Y/USP13/USP32/MINDY3/USP47/USP33/USP14/USP22/USP25/STAMBP/SENP6/OTUD7B/USP38/USP42/USP10/USPL1/UCHL5/USP48/EIF3F/USP12/USP8/USP15/OTUB1/JOSD1/USP36/OTUD3/USP28/CYLD/TNFAIP3/ZC3H12A	32
GO:0031625	MF	GO:0031625	ubiquitin protein ligase binding	45/434	299/18432	1.68245737297356e-23	9.27454626851674e-22	7.50464538734259e-22	HERC2/MID1/UBE2J1/CUL7/TRIM37/CUL4B/SPOPL/USP13/HLTF/TNK2/UBE2G1/ISG15/VCP/MAP1LC3A/BAG6/STUB1/USP25/SNX9/PIAS4/TRAF3/UBE2L3/PIAS2/PATZ1/TOLLIP/RBX1/CUL5/NEDD8/UBE2A/RFFL/MAP1LC3B/RNF34/PDLIM2/RNF8/FAF1/OTUB1/LYN/ARIH1/GABARAPL1/MUL1/GABARAP/TRAF4/UBC/FBXW7/BAG1/MDM2	45
GO:0101005	MF	GO:0101005	deubiquitinase activity	30/434	114/18432	2.50776471247791e-23	1.22880470911418e-21	9.94306710561418e-22	USP4/USP45/USP9Y/USP13/USP32/MINDY3/USP47/USP33/USP14/USP22/USP25/STAMBP/OTUD7B/USP38/USP42/USP10/UCHL5/USP48/EIF3F/USP12/USP8/USP15/OTUB1/JOSD1/USP36/OTUD3/USP28/CYLD/TNFAIP3/ZC3H12A	30
GO:0044389	MF	GO:0044389	ubiquitin-like protein ligase binding	46/434	318/18432	2.90829555383746e-23	1.28255833924232e-21	1.03780230815884e-21	HERC2/MID1/UBE2J1/CUL7/TRIM37/CUL4B/SPOPL/USP13/HLTF/TNK2/UBE2G1/ISG15/VCP/MAP1LC3A/BAG6/STUB1/USP25/SNX9/STAM/PIAS4/TRAF3/UBE2L3/PIAS2/PATZ1/TOLLIP/RBX1/CUL5/NEDD8/UBE2A/RFFL/MAP1LC3B/RNF34/PDLIM2/RNF8/FAF1/OTUB1/LYN/ARIH1/GABARAPL1/MUL1/GABARAP/TRAF4/UBC/FBXW7/BAG1/MDM2	46
GO:0004843	MF	GO:0004843	cysteine-type deubiquitinase activity	29/434	109/18432	9.77325511748723e-23	3.91818682437443e-21	3.17046266490734e-21	USP4/USP45/USP9Y/USP13/USP32/MINDY3/USP47/USP33/USP14/USP22/USP25/OTUD7B/USP38/USP42/USP10/UCHL5/USP48/EIF3F/USP12/USP8/USP15/OTUB1/JOSD1/USP36/OTUD3/USP28/CYLD/TNFAIP3/ZC3H12A	29
GO:0070936	BP	GO:0070936	protein K48-linked ubiquitination	24/434	68/18903	1.45363491105819e-22	7.95622841319183e-20	6.79128029499642e-20	UBE2E2/NEDD4L/UBE2E3/RNF187/TTC3/UBE2G1/KBTBD7/SYVN1/UBE2Q2/BTRC/RBX1/UBE2R2/UBE2A/RFFL/BFAR/RNF34/RNF8/GABARAP/PELI1/TRIM38/ZNRF2/ZNRF1/TNFAIP3/AMFR	24
GO:0140030	MF	GO:0140030	modification-dependent protein binding	33/434	172/18432	7.20517821409114e-21	2.64790299367849e-19	2.1425924689271e-19	ING3/PRPF8/PLCG2/TRIM24/TOM1/FAAP20/TNIP2/VCP/RAD23B/TAB3/UBQLN1/FAN1/PHF8/PHF2/DZIP3/BAG6/OTUD7B/DNAJB2/ZBTB1/EPS15/CBX4/ING2/RBBP5/ANKRD13D/PHF1/USP15/PWP1/LYN/MTF2/ING1/RNF168/TNFAIP3/KDM7A	33
GO:0042176	BP	GO:0042176	regulation of protein catabolic process	45/434	361/18903	1.5496465553401e-20	7.27005612533843e-18	6.20557710807623e-18	SOCS4/RNF144A/SH3RF1/CUL4B/USP13/FBXL5/NEDD4/SH3D19/VCP/RAD23B/RNF41/RNF144B/RHBDD3/UBQLN1/SOCS5/BAG6/RNF14/BARD1/STUB1/MYCBP2/USP14/USP25/DDB1/SNX9/BTRC/CDH1/DNAJB2/RBX1/RNF185/ANKIB1/UCHL5/UFL1/USP8/ATG7/FAF1/ARIH1/NUB1/GABARAP/RNF180/RNF19A/MDM4/RNF19B/FBXW7/TNFAIP3/MDM2	45
GO:0045732	BP	GO:0045732	positive regulation of protein catabolic process	35/434	209/18903	2.19338400581987e-20	8.56139383592806e-18	7.30783761301251e-18	SOCS4/RNF144A/SH3RF1/CUL4B/USP13/FBXL5/NEDD4/SH3D19/VCP/RNF41/RNF144B/RHBDD3/UBQLN1/SOCS5/BAG6/RNF14/BARD1/STUB1/DDB1/SNX9/DNAJB2/RBX1/RNF185/ANKIB1/ATG7/FAF1/ARIH1/NUB1/GABARAP/RNF180/RNF19A/RNF19B/FBXW7/TNFAIP3/MDM2	35
GO:0070534	BP	GO:0070534	protein K63-linked ubiquitination	21/434	57/18903	2.34630159937127e-20	8.56139383592806e-18	7.30783761301251e-18	UBE2V1/RNF213/UBE2E2/UBE2E3/NEDD4/UBE2G1/TRIM27/STUB1/TRIP12/TRAF3/UBE2V2/WWP2/ZFP91/UBE2O/TRAF3IP2/BFAR/RNF8/OTUB1/PELI1/RNF168/UBE2S	21
GO:0008234	MF	GO:0008234	cysteine-type peptidase activity	32/434	185/18432	7.42218360376257e-19	2.51783305327638e-17	2.03734432524333e-17	USP4/USP45/USP9Y/USP13/USP32/MINDY3/USP47/USP33/USP14/USP22/USP25/SENP6/OTUD7B/MALT1/USP38/USP42/USP10/USPL1/UCHL5/USP48/EIF3F/USP12/USP8/USP15/OTUB1/JOSD1/USP36/OTUD3/USP28/CYLD/TNFAIP3/ZC3H12A	32
GO:1903320	BP	GO:1903320	regulation of protein modification by small protein conjugation or removal	34/434	252/18903	7.88266732735518e-17	2.58866795030344e-14	2.20963611502598e-14	UBE2V1/USP4/TNIP1/SPOPL/ISG15/VCP/UBQLN1/STUB1/MYCBP2/TRIP12/BTRC/PIAS4/MALT1/UBE2L3/DNAJB2/TOLLIP/UBE2V2/RBX1/ABL1/XIAP/UFL1/OTUB1/ARNT/MUL1/GABARAP/RNF180/PELI1/UBE2S/FBXO2/FBXW7/TNFAIP3/BIRC3/ZC3H12A/IVNS1ABP	34
GO:1903050	BP	GO:1903050	regulation of proteolysis involved in protein catabolic process	32/434	227/18903	1.80641130230972e-16	5.39295883344103e-14	4.60332373019215e-14	LATS1/SOCS4/RNF144A/SH3RF1/USP13/VCP/RAD23B/RNF144B/UBQLN1/SOCS5/BAG6/RNF14/STUB1/USP14/USP25/BTRC/DNAJB2/RBX1/RNF185/ANKIB1/UCHL5/UFL1/ARIH1/NUB1/GABARAP/RNF180/RNF19A/RNF139/RNF19B/SMURF1/FBXW7/MDM2	32
GO:2000058	BP	GO:2000058	regulation of ubiquitin-dependent protein catabolic process	28/434	170/18903	2.39096131891508e-16	6.54326414276427e-14	5.58520174760601e-14	LATS1/SOCS4/RNF144A/SH3RF1/VCP/RAD23B/RNF144B/UBQLN1/SOCS5/BAG6/RNF14/STUB1/USP14/DNAJB2/RBX1/ANKIB1/UCHL5/UFL1/ARIH1/NUB1/GABARAP/RNF180/RNF19A/RNF139/RNF19B/SMURF1/FBXW7/MDM2	28
GO:1903052	BP	GO:1903052	positive regulation of proteolysis involved in protein catabolic process	25/434	136/18903	6.84683956723743e-16	1.72961701067752e-13	1.47636710668448e-13	SOCS4/RNF144A/SH3RF1/USP13/VCP/RNF144B/UBQLN1/SOCS5/BAG6/RNF14/STUB1/DNAJB2/RBX1/RNF185/ANKIB1/ARIH1/NUB1/GABARAP/RNF180/RNF19A/RNF139/RNF19B/SMURF1/FBXW7/MDM2	25
GO:0061136	BP	GO:0061136	regulation of proteasomal protein catabolic process	29/434	194/18903	9.9807185141223e-16	2.34119140002697e-13	1.99839499271486e-13	SOCS4/RNF144A/SH3RF1/USP13/VCP/RAD23B/RNF144B/UBQLN1/SOCS5/BAG6/RNF14/STUB1/USP14/USP25/BTRC/DNAJB2/RBX1/RNF185/ANKIB1/UCHL5/UFL1/ARIH1/NUB1/GABARAP/RNF180/RNF19A/RNF19B/FBXW7/MDM2	29
GO:0019005	CC	GO:0019005	SCF ubiquitin ligase complex	18/437	64/19869	1.45813068959704e-15	1.88584902521217e-13	1.58092064240521e-13	FBXW11/FBXO25/FBXL8/FBXL5/FBXO9/FBXL17/FBXW5/FBXO42/FBXL4/USP47/BTRC/FBXO45/RBX1/CUL5/FBXL15/FBXO6/FBXO2/FBXW7	18
GO:1901800	BP	GO:1901800	positive regulation of proteasomal protein catabolic process	23/434	118/18903	2.654414390431e-15	5.81139790545028e-13	4.96049510295983e-13	SOCS4/RNF144A/SH3RF1/USP13/VCP/RNF144B/UBQLN1/SOCS5/BAG6/RNF14/STUB1/DNAJB2/RBX1/RNF185/ANKIB1/ARIH1/NUB1/GABARAP/RNF180/RNF19A/RNF19B/FBXW7/MDM2	23
GO:2000060	BP	GO:2000060	positive regulation of ubiquitin-dependent protein catabolic process	22/434	110/18903	6.12016183236553e-15	1.25616321609302e-12	1.07223624734141e-12	SOCS4/RNF144A/SH3RF1/VCP/RNF144B/UBQLN1/SOCS5/RNF14/STUB1/DNAJB2/RBX1/ANKIB1/ARIH1/NUB1/GABARAP/RNF180/RNF19A/RNF139/RNF19B/SMURF1/FBXW7/MDM2	22
GO:0032434	BP	GO:0032434	regulation of proteasomal ubiquitin-dependent protein catabolic process	24/434	141/18903	1.59740868885638e-14	3.08581772600256e-12	2.63399339840528e-12	SOCS4/RNF144A/SH3RF1/VCP/RAD23B/RNF144B/UBQLN1/SOCS5/BAG6/RNF14/STUB1/USP14/DNAJB2/RBX1/ANKIB1/UCHL5/UFL1/ARIH1/NUB1/GABARAP/RNF180/RNF19A/RNF19B/MDM2	24
GO:0031331	BP	GO:0031331	positive regulation of cellular catabolic process	40/434	429/18903	5.23130688204724e-14	9.54422877813507e-12	8.1467662145566e-12	SOCS4/RNF144A/TRIM68/SH3RF1/PRKAA1/TOM1/SH3D19/VCP/RNF144B/UBQLN1/SOCS5/TRIM27/RNF14/STUB1/SNX9/LRSAM1/ATG16L1/DNAJB2/RBX1/PRKAA2/ANKIB1/ZBTB20/UFL1/ARIH1/ARNT/TRIM22/NUB1/GABARAP/RNF180/TRIM8/RNF19A/CNOT4/RNF139/TRIM38/RNF19B/RC3H1/SMURF1/FBXW7/ZC3H12A/MDM2	40
GO:1903322	BP	GO:1903322	positive regulation of protein modification by small protein conjugation or removal	23/434	137/18903	7.72497637107701e-14	1.3352011790851e-11	1.13970150006527e-11	UBE2V1/TNIP1/VCP/UBQLN1/STUB1/MYCBP2/BTRC/PIAS4/MALT1/UBE2L3/TOLLIP/UBE2V2/RBX1/XIAP/ARNT/MUL1/GABARAP/RNF180/PELI1/UBE2S/FBXW7/BIRC3/ZC3H12A	23
GO:0036503	BP	GO:0036503	ERAD pathway	21/434	112/18903	9.85270555743665e-14	1.6178142525311e-11	1.3809344683923e-11	UBE2J1/USP13/VCP/UBQLN1/BAG6/STUB1/USP14/SYVN1/USP25/DNAJB2/RNF185/UBXN6/RNF103/FAF1/FBXO6/RNF139/TMUB1/UBAC2/FBXO2/TMUB2/AMFR	21
GO:0031146	BP	GO:0031146	SCF-dependent proteasomal ubiquitin-dependent protein catabolic process	15/434	49/18903	1.57701617193567e-13	2.46615290887464e-11	2.10505968213769e-11	FBXW11/FBXL8/CUL4B/FBXL5/FBXO9/FBXL17/FBXW5/FBXL4/BTRC/RBX1/CUL5/FBXL15/FBXO6/FBXO2/FBXW7	15
GO:0031463	CC	GO:0031463	Cul3-RING ubiquitin ligase complex	13/437	36/19869	3.44546299652235e-13	3.34209910662668e-11	2.80170543664580e-11	SPOPL/KLHL20/KLHL22/KBTBD7/KLHL12/KLHL8/KLHL9/KCTD2/RBX1/KLHL42/KCTD10/GAN/ENC1	13
GO:0032436	BP	GO:0032436	positive regulation of proteasomal ubiquitin-dependent protein catabolic process	19/434	94/18903	3.61533427911192e-13	5.39670807845615e-11	4.60652401209332e-11	SOCS4/RNF144A/SH3RF1/VCP/RNF144B/UBQLN1/SOCS5/RNF14/STUB1/DNAJB2/RBX1/ANKIB1/ARIH1/NUB1/GABARAP/RNF180/RNF19A/RNF19B/MDM2	19
GO:0034976	BP	GO:0034976	response to endoplasmic reticulum stress	30/434	261/18903	4.06881311027e-13	5.79206927683642e-11	4.94399656523347e-11	UBE2J1/USP13/VCP/TBL2/UBQLN1/UBA5/BAG6/STUB1/USP14/SYVN1/USP25/DNAJB2/RNF185/UBXN6/ABL1/UFL1/RNF103/ATG10/UFC1/BFAR/FAF1/FBXO6/NCK1/RNF139/TMUB1/UBAC2/FBXO2/TMUB2/NCK2/AMFR	30
GO:0031396	BP	GO:0031396	regulation of protein ubiquitination	27/434	210/18903	4.2329373521338e-13	5.79206927683642e-11	4.94399656523347e-11	UBE2V1/USP4/SPOPL/ISG15/UBQLN1/STUB1/MYCBP2/TRIP12/BTRC/MALT1/UBE2L3/DNAJB2/UBE2V2/RBX1/ABL1/XIAP/UFL1/OTUB1/GABARAP/RNF180/PELI1/UBE2S/FBXO2/FBXW7/TNFAIP3/BIRC3/IVNS1ABP	27
GO:0031593	MF	GO:0031593	polyubiquitin modification-dependent protein binding	15/434	54/18432	1.11506877522134e-12	3.51246664194723e-11	2.84216778045139e-11	PRPF8/TOM1/FAAP20/TNIP2/VCP/RAD23B/TAB3/UBQLN1/DZIP3/BAG6/OTUD7B/ZBTB1/EPS15/RNF168/TNFAIP3	15
GO:0016570	BP	GO:0016570	histone modification	40/434	474/18903	1.32632857247875e-12	1.74226521280808e-10	1.48716336358354e-10	KDM5D/ING3/JADE1/KDM5B/BCL6/TRIM37/CUL4B/WDR5B/NSD2/PCGF2/PHF8/PHF2/BARD1/USP22/TRIP12/DDB1/KDM5C/UBE2A/UFL1/TBL1XR1/WDR82/ING2/RBBP5/PHF1/RBBP7/USP15/RNF8/PWP1/OTUB1/CHD3/DDB2/MTF2/USP36/RNF168/TAF5L/EED/KDM2A/CHD4/RNF2/KDM7A	40
GO:0045862	BP	GO:0045862	positive regulation of proteolysis	35/434	372/18903	1.64274004592406e-12	2.07490704262101e-10	1.77109989566631e-10	FBXW11/TNIP1/SOCS4/RNF144A/SH3RF1/USP13/SH3D19/VCP/RNF144B/UBQLN1/SOCS5/BAG6/RNF14/STUB1/SNX9/BTRC/MALT1/DNAJB2/RBX1/RNF185/ANKIB1/SRC/LYN/ARIH1/MUL1/NUB1/GABARAP/RNF180/RNF19A/RNF139/RNF19B/SMURF1/FBXW7/ZC3H12A/MDM2	35
GO:0033522	BP	GO:0033522	histone H2A ubiquitination	12/434	32/18903	2.74951932222759e-12	3.34423016822052e-10	2.85456918327176e-10	TRIM37/CUL4B/PCGF2/BARD1/TRIP12/DDB1/UBE2A/RNF8/OTUB1/DDB2/RNF168/RNF2	12
GO:0061650	MF	GO:0061650	ubiquitin-like protein conjugating enzyme activity	13/434	40/18432	3.86355737364064e-12	1.13588586785035e-10	9.19119964676614e-11	UBE2E2/UBE2J1/UBE2E3/UBE2G1/UBE2Q2/UBE2L3/UBE2M/UBE2R2/UBE2A/BIRC6/UFC1/UBE2O/UBE2S	13
GO:0006513	BP	GO:0006513	protein monoubiquitination	17/434	84/18903	6.25373682882693e-12	7.33473990923844e-10	6.26078991547598e-10	CBL/TRIM37/CUL4B/KLHL22/FAAP20/PCGF2/KLHL12/BARD1/DDB1/RBX1/UBE2R2/UBE2O/RNF220/DDB2/TRIM41/RNF168/RNF2	17
GO:0043122	BP	GO:0043122	regulation of I-kappaB kinase/NF-kappaB signaling	28/434	255/18903	7.68011611720066e-12	8.69706942375412e-10	7.4236476298023e-10	UBE2V1/TNIP1/PLCG2/TRIM68/TNIP2/TAB3/TRIM27/BTRC/OTUD7B/MAP3K3/TRAF3/MALT1/TFG/USP10/PELI2/ABL1/UFL1/TRAF3IP2/TRIM52/TRIM22/MUL1/TRIM8/PELI1/TRAF4/TRIM38/TNFAIP3/BIRC3/ZC3H12A	28
GO:0016236	BP	GO:0016236	macroautophagy	30/434	317/18903	5.84832320825427e-11	6.401964471969e-09	5.46459112406355e-09	RNF213/NEDD4/TOM1/VCP/RNF41/MAP1LC3A/VPS41/UBQLN1/UBXN2B/UBA5/STAM/LRSAM1/WIPI2/ATG16L1/STAM2/UBXN6/PRKAA2/ATG3/UFL1/ATG10/UFC1/ATG7/MAP1LC3B/SRC/GABARAPL1/PIK3R4/GABARAP/USP36/WDR45B/SMURF1	30
GO:1903008	BP	GO:1903008	organelle disassembly	20/434	139/18903	6.17628202666433e-11	6.54287425018248e-09	5.58486894295658e-09	PRKAA1/VCP/RNF41/MAP1LC3A/FBXL4/UBA5/WIPI2/PRKAA2/ATG3/UFL1/UFC1/ATG7/MAP1LC3B/GABARAPL1/MUL1/GABARAP/USP36/NEDD9/WDR45B/FBXW7	20
GO:0016574	BP	GO:0016574	histone ubiquitination	13/434	52/18903	1.15999610685306e-10	1.19044600465795e-08	1.01614132649661e-08	TRIM37/CUL4B/PCGF2/BARD1/USP22/TRIP12/DDB1/UBE2A/RNF8/OTUB1/DDB2/RNF168/RNF2	13
GO:0030433	BP	GO:0030433	ubiquitin-dependent ERAD pathway	16/434	87/18903	1.20692180817735e-10	1.20107006607709e-08	1.02520981664315e-08	UBE2J1/VCP/UBQLN1/BAG6/STUB1/USP14/SYVN1/DNAJB2/RNF185/RNF103/FAF1/FBXO6/TMUB1/FBXO2/TMUB2/AMFR	16
GO:0007249	BP	GO:0007249	I-kappaB kinase/NF-kappaB signaling	28/434	288/18903	1.38710338162948e-10	1.33977867802094e-08	1.14360876324437e-08	UBE2V1/TNIP1/PLCG2/TRIM68/TNIP2/TAB3/TRIM27/BTRC/OTUD7B/MAP3K3/TRAF3/MALT1/TFG/USP10/PELI2/ABL1/UFL1/TRAF3IP2/TRIM52/TRIM22/MUL1/TRIM8/PELI1/TRAF4/TRIM38/TNFAIP3/BIRC3/ZC3H12A	28
GO:0080008	CC	GO:0080008	Cul4-RING E3 ubiquitin ligase complex	11/437	36/19869	1.88284087439127e-10	1.46108451852763e-08	1.22483753723559e-08	CUL4B/FBXW5/DCAF6/DCAF16/DCAF7/DCAF11/DDB1/TRPC4AP/RBX1/DCAF5/DDB2	11
GO:0061631	MF	GO:0061631	ubiquitin conjugating enzyme activity	11/434	36/18432	3.84542540354389e-10	1.05989537685179e-08	8.57631060395645e-09	UBE2E2/UBE2J1/UBE2E3/UBE2G1/UBE2Q2/UBE2L3/UBE2R2/UBE2A/BIRC6/UBE2O/UBE2S	11
GO:0051219	MF	GO:0051219	phosphoprotein binding	16/434	92/18432	4.15661463455008e-10	1.07827473755093e-08	8.72503009976767e-09	GRAP2/CBL/PLCG2/MID1/NEDD4/TBL2/BTRC/ABL1/CBX4/ABL2/SRC/LYN/CBLC/NCK2/FBXW7/SOCS3	16
GO:0044390	MF	GO:0044390	ubiquitin-like protein conjugating enzyme binding	11/434	37/18432	5.35745225441753e-10	1.31257580233229e-08	1.06209141184067e-08	RNF144A/RNF144B/RNF14/TOLLIP/RNF185/ANKIB1/SIAH1/ARIH1/RNF180/RNF19A/RNF19B	11
GO:0031624	MF	GO:0031624	ubiquitin conjugating enzyme binding	10/434	31/18432	1.34645225660403e-09	3.1251865534862e-08	2.52879398885743e-08	RNF144A/RNF144B/RNF14/TOLLIP/ANKIB1/SIAH1/ARIH1/RNF180/RNF19A/RNF19B	10
GO:0016055	BP	GO:0016055	Wnt signaling pathway	34/434	456/18903	1.808044213862e-09	1.69646205666366e-07	1.44806668917729e-07	FBXW11/LATS1/RNF213/JADE1/PLCG2/PRKAA1/VCP/KLHL12/USP47/DDB1/BTRC/PIAS4/STRN/RBX1/PRKAA2/ABL1/XIAP/TBL1XR1/PPP2CA/USP8/SRC/RNF220/SIAH1/RNF138/ZNRF3/LATS2/UBAC2/TLE4/RNF43/CYLD/TLE2/SMURF1/TNFAIP3/AMFR	34
GO:0016925	BP	GO:0016925	protein sumoylation	13/434	64/18903	1.86854101481871e-09	1.70452463685129e-07	1.45494874925796e-07	NSMCE1/RANBP2/TRIM27/UHRF2/SENP6/PIAS4/PIAS2/TOLLIP/CBX4/ARNT/MUL1/TRIM38/MDM2	13
GO:0198738	BP	GO:0198738	cell-cell signaling by wnt	34/434	458/18903	2.0229674937613e-09	1.79552033770598e-07	1.53262089214405e-07	FBXW11/LATS1/RNF213/JADE1/PLCG2/PRKAA1/VCP/KLHL12/USP47/DDB1/BTRC/PIAS4/STRN/RBX1/PRKAA2/ABL1/XIAP/TBL1XR1/PPP2CA/USP8/SRC/RNF220/SIAH1/RNF138/ZNRF3/LATS2/UBAC2/TLE4/RNF43/CYLD/TLE2/SMURF1/TNFAIP3/AMFR	34
GO:0004197	MF	GO:0004197	cysteine-type endopeptidase activity	17/434	120/18432	3.16630923305807e-09	6.98171185889303e-08	5.64936226319308e-08	USP9Y/USP13/USP47/USP33/USP14/USP25/SENP6/MALT1/USP38/USP42/USP10/USP48/USP12/USP8/USP15/USP36/USP28	17
GO:0006301	BP	GO:0006301	postreplication repair	10/434	35/18903	4.03305139597366e-09	3.48540546957302e-07	2.97507364750079e-07	POLK/UBE2V1/NSMCE1/FAAP20/VCP/UBE2V2/USP10/ZBTB1/UBE2A/POLI	10
GO:0071108	BP	GO:0071108	protein K48-linked deubiquitination	10/434	36/18903	5.47067124843146e-09	4.6065857384228e-07	3.93209110244884e-07	USP13/MINDY3/USP33/USP25/OTUD7B/USP8/USP15/OTUB1/OTUD3/TNFAIP3	10
GO:0031647	BP	GO:0031647	regulation of protein stability	27/434	325/18903	9.32813532177049e-09	7.65839909917358e-07	6.53705904259864e-07	FBXW11/VHL/USP4/NEDD4L/USP13/TRIM24/TNIP2/DDI2/USP47/USP33/BAG6/STUB1/SYVN1/BTRC/UBL4A/USP8/SRC/MUL1/RNF149/USP36/RNF139/OTUD3/MDM4/USP28/FBXW7/BAG1/MDM2	27
GO:0070536	BP	GO:0070536	protein K63-linked deubiquitination	10/434	38/18903	9.7647997887966e-09	7.82136646497757e-07	6.67616478499752e-07	USP13/VCP/USP33/BARD1/USP25/STAMBP/OTUD7B/USP8/CYLD/TNFAIP3	10
GO:0031398	BP	GO:0031398	positive regulation of protein ubiquitination	16/434	119/18903	1.4004039241325e-08	1.09498249686932e-06	9.34655551369635e-07	UBE2V1/UBQLN1/STUB1/MYCBP2/BTRC/MALT1/UBE2L3/UBE2V2/RBX1/XIAP/GABARAP/RNF180/PELI1/UBE2S/FBXW7/BIRC3	16
GO:0035518	BP	GO:0035518	histone H2A monoubiquitination	8/434	23/18903	2.62377730516984e-08	2.00383364422739e-06	1.71043303884144e-06	TRIM37/CUL4B/PCGF2/BARD1/DDB1/DDB2/RNF168/RNF2	8
GO:0019789	MF	GO:0019789	SUMO transferase activity	8/434	23/18432	3.18576343974034e-08	6.69010322345471e-07	5.41340253670163e-07	RANBP2/TRIM27/UHRF2/PIAS4/PIAS2/CBX4/MUL1/MDM2	8
GO:0019898	CC	GO:0019898	extrinsic component of membrane	25/437	316/19869	3.84684454351151e-08	2.48762613813744e-06	2.08539467358782e-06	SOCS4/SOCS2/TRIO/PACSIN2/GNB2/TNK2/GNB1/STXBP5/SOCS5/ASPSCR1/SNX9/WIPI2/CDH1/UBXN6/USP8/SRC/LYN/PIK3R4/GNB5/UBC/CYLD/WDR45B/SOCS6/ZC3H12A/SOCS3	25
GO:0070530	MF	GO:0070530	K63-linked polyubiquitin modification-dependent protein binding	8/434	24/18432	4.68075463122662e-08	9.38278541986792e-07	7.59222880375993e-07	PRPF8/FAAP20/TNIP2/TAB3/OTUD7B/ZBTB1/RNF168/TNFAIP3	8
GO:0042393	MF	GO:0042393	histone binding	23/434	258/18432	5.11582868252269e-08	9.8090454304022e-07	7.9371438140741e-07	ING3/KDM5B/WDR5B/TRIM24/PHF8/PHF2/UHRF2/MPND/CBX4/TBL1XR1/ING2/RBBP5/PHF1/RBBP7/USP15/RNF8/PWP1/CHD3/MTF2/ING1/RNF168/CHD4/KDM7A	23
GO:0090734	CC	GO:0090734	site of DNA damage	14/437	106/19869	8.44082684039528e-08	4.67862973439052e-06	3.92212856192803e-06	POLK/VCP/DDB1/CUL5/ARPC1A/UFL1/ELOA/PHF1/RNF8/WDR70/DDB2/RNF138/RNF168/ZBTB7A	14
GO:0045309	MF	GO:0045309	protein phosphorylated amino acid binding	11/434	58/18432	9.14303474723294e-08	1.68003263480405e-06	1.359424903207e-06	GRAP2/CBL/PLCG2/NEDD4/BTRC/ABL1/ABL2/CBLC/NCK2/FBXW7/SOCS3	11
GO:0018205	BP	GO:0018205	peptidyl-lysine modification	29/434	414/18903	1.12735859720597e-07	8.41419462096455e-06	7.18219125444856e-06	ING3/JADE1/WDR5B/NSD2/NSMCE1/PRKAA1/RANBP2/PCGF2/BAG6/TRIM27/USP22/UHRF2/SENP6/PIAS4/PIAS2/TOLLIP/PRKAA2/USPL1/CBX4/WDR82/RBBP5/PHF1/PWP1/ARNT/MUL1/MTF2/TAF5L/TRIM38/MDM2	29
GO:0010506	BP	GO:0010506	regulation of autophagy	26/434	344/18903	1.18155324975212e-07	8.62271304930211e-06	7.36017848909915e-06	TRIM68/USP13/NEDD4/PRKAA1/KLHL22/TOM1/TAB3/RNF41/UBQLN1/USP33/TRIM27/LRSAM1/ATG16L1/HERC1/USP10/PRKAA2/ABL1/UFL1/ABL2/TRIM22/PIK3R4/TRIM8/USP36/TRIM38/FBXW7/ZC3H12A	26
GO:0000422	BP	GO:0000422	autophagy of mitochondrion	13/434	93/18903	2.01868663051181e-07	1.41050359459591e-05	1.20397816283381e-05	RNF41/MAP1LC3A/FBXL4/WIPI2/ATG3/ATG7/MAP1LC3B/GABARAPL1/MUL1/GABARAP/USP36/WDR45B/FBXW7	13
GO:0061726	BP	GO:0061726	mitochondrion disassembly	13/434	93/18903	2.01868663051181e-07	1.41050359459591e-05	1.20397816283381e-05	RNF41/MAP1LC3A/FBXL4/WIPI2/ATG3/ATG7/MAP1LC3B/GABARAPL1/MUL1/GABARAP/USP36/WDR45B/FBXW7	13
GO:0000045	BP	GO:0000045	autophagosome assembly	14/434	110/18903	2.26741470954515e-07	1.55128956378048e-05	1.32415030077165e-05	TOM1/MAP1LC3A/UBQLN1/UBXN2B/LRSAM1/WIPI2/ATG16L1/ATG3/ATG7/MAP1LC3B/GABARAPL1/GABARAP/WDR45B/SMURF1	14
GO:0140036	MF	GO:0140036	ubiquitin-dependent protein binding	6/434	13/18432	2.45602621077463e-07	4.33243023580645e-06	3.50565425453726e-06	FAAP20/VCP/FAN1/DNAJB2/ANKRD13D/USP15	6
GO:0070979	BP	GO:0070979	protein K11-linked ubiquitination	8/434	30/18903	2.71971852789521e-07	1.82276645828732e-05	1.55587764549623e-05	CDC27/UBE2E2/UBE2E3/ANAPC13/ANAPC5/UBE2L3/UBE2A/UBE2S	8
GO:0043123	BP	GO:0043123	positive regulation of I-kappaB kinase/NF-kappaB signaling	18/434	189/18903	3.87859946006954e-07	2.54746412537367e-05	2.17446533940319e-05	UBE2V1/TRIM68/TNIP2/TAB3/TRIM27/MAP3K3/MALT1/TFG/PELI2/ABL1/TRAF3IP2/TRIM52/TRIM22/MUL1/TRIM8/PELI1/TRIM38/BIRC3	18
GO:0000152	CC	GO:0000152	nuclear ubiquitin ligase complex	9/437	45/19869	4.87177755037397e-07	2.36281211193137e-05	1.98076218824415e-05	CDC27/CUL7/PCGF2/ANAPC13/ANAPC5/BARD1/CBX4/UBE2S/RNF2	9
GO:1905037	BP	GO:1905037	autophagosome organization	14/434	117/18903	4.90481439026198e-07	3.15831577600399e-05	2.69587630985917e-05	TOM1/MAP1LC3A/UBQLN1/UBXN2B/LRSAM1/WIPI2/ATG16L1/ATG3/ATG7/MAP1LC3B/GABARAPL1/GABARAP/WDR45B/SMURF1	14
GO:0140035	MF	GO:0140035	ubiquitination-like modification-dependent protein binding	6/434	15/18432	6.88180567991892e-07	1.16726011724779e-05	9.44506933397778e-06	FAAP20/VCP/FAN1/DNAJB2/ANKRD13D/USP15	6
GO:0010390	BP	GO:0010390	histone monoubiquitination	8/434	35/18903	9.88903435911345e-07	6.24530554525549e-05	5.33087014136014e-05	TRIM37/CUL4B/PCGF2/BARD1/DDB1/DDB2/RNF168/RNF2	8
GO:0051090	BP	GO:0051090	regulation of DNA-binding transcription factor activity	28/434	454/18903	2.36826032112135e-06	0.000146742771595519	0.000125256747470629	UBE2V1/TAF3/PLCG2/NWD1/TRIM68/TRIM37/RLIM/TRIM27/BTRC/PIAS4/TRAF3/MALT1/WWP2/UFL1/PRKCI/TRIM52/RNF220/FAF1/TRIM22/TRIM41/TRIM8/PELI1/TRIM38/ZBTB7A/RNF2/CYLD/TNFAIP3/ZC3H12A	28
GO:0070076	BP	GO:0070076	histone lysine demethylation	7/434	28/18903	2.49931663606718e-06	0.000151995478386011	0.00012974035481183	KDM5D/KDM5B/PHF8/PHF2/KDM5C/KDM2A/KDM7A	7
GO:0035064	MF	GO:0035064	methylated histone binding	11/434	80/18432	2.64298945275858e-06	4.16270838809477e-05	3.36832114468105e-05	ING3/PHF8/PHF2/CBX4/ING2/RBBP5/PHF1/PWP1/MTF2/ING1/KDM7A	11
GO:0140034	MF	GO:0140034	methylation-dependent protein binding	11/434	80/18432	2.64298945275858e-06	4.16270838809477e-05	3.36832114468105e-05	ING3/PHF8/PHF2/CBX4/ING2/RBBP5/PHF1/PWP1/MTF2/ING1/KDM7A	11
GO:1905897	BP	GO:1905897	regulation of response to endoplasmic reticulum stress	11/434	82/18903	2.66395188583032e-06	0.000159062145328487	0.000135772322908443	USP13/UBQLN1/BAG6/USP14/SYVN1/USP25/RNF185/UFL1/BFAR/NCK1/NCK2	11
GO:0009267	BP	GO:0009267	cellular response to starvation	16/434	175/18903	2.93734302243296e-06	0.000172254187244105	0.00014703279076577	MIOS/PRKAA1/TBL2/MAP1LC3A/VPS41/USP33/WIPI2/PRKAA2/ATG7/MAP1LC3B/RNF167/GABARAPL1/PIK3R4/GABARAP/WDR45B/ZC3H12A	16
GO:0061912	BP	GO:0061912	selective autophagy	11/434	83/18903	3.00842606871489e-06	0.000173327565081749	0.00014794900500439	RNF213/RNF41/UBQLN1/UBA5/LRSAM1/WIPI2/ATG16L1/UFL1/UFC1/MAP1LC3B/GABARAPL1	11
GO:0016577	BP	GO:0016577	histone demethylation	7/434	29/18903	3.2298019047861e-06	0.000182873611298579	0.000156097322548918	KDM5D/KDM5B/PHF8/PHF2/KDM5C/KDM2A/KDM7A	7
GO:0030111	BP	GO:0030111	regulation of Wnt signaling pathway	23/434	336/18903	3.47194048740388e-06	0.000193251738315836	0.000164955887920723	LATS1/RNF213/JADE1/VCP/USP47/BTRC/RBX1/ABL1/XIAP/TBL1XR1/PPP2CA/USP8/SRC/RNF220/ZNRF3/LATS2/UBAC2/TLE4/RNF43/CYLD/TLE2/TNFAIP3/AMFR	23
GO:1904292	BP	GO:1904292	regulation of ERAD pathway	6/434	20/18903	4.173522310569e-06	0.000228430787798477	0.000194984033562197	USP13/UBQLN1/BAG6/USP14/USP25/RNF185	6
GO:0006995	BP	GO:0006995	cellular response to nitrogen starvation	5/434	12/18903	4.32252138799671e-06	0.000228954197390019	0.000195430805708578	MAP1LC3A/ATG7/MAP1LC3B/GABARAPL1/GABARAP	5
GO:0043562	BP	GO:0043562	cellular response to nitrogen levels	5/434	12/18903	4.32252138799671e-06	0.000228954197390019	0.000195430805708578	MAP1LC3A/ATG7/MAP1LC3B/GABARAPL1/GABARAP	5
GO:0032452	MF	GO:0032452	histone demethylase activity	7/434	30/18432	4.8702699251564e-06	7.15929678997991e-05	5.79305791097551e-05	KDM5D/KDM5B/PHF8/PHF2/KDM5C/KDM2A/KDM7A	7
GO:0140457	MF	GO:0140457	protein demethylase activity	7/434	30/18432	4.8702699251564e-06	7.15929678997991e-05	5.79305791097551e-05	KDM5D/KDM5B/PHF8/PHF2/KDM5C/KDM2A/KDM7A	7
GO:0031464	CC	GO:0031464	Cul4A-RING E3 ubiquitin ligase complex	5/437	13/19869	5.59651145411946e-06	0.00024127182713315	0.000202259887640107	CUL4B/DDB1/TRPC4AP/RBX1/DDB2	5
GO:0006482	BP	GO:0006482	protein demethylation	7/434	32/18903	6.56271215180216e-06	0.000336749167289348	0.000287442474675151	KDM5D/KDM5B/PHF8/PHF2/KDM5C/KDM2A/KDM7A	7
GO:0008214	BP	GO:0008214	protein dealkylation	7/434	32/18903	6.56271215180216e-06	0.000336749167289348	0.000287442474675151	KDM5D/KDM5B/PHF8/PHF2/KDM5C/KDM2A/KDM7A	7
GO:0031669	BP	GO:0031669	cellular response to nutrient levels	18/434	231/18903	6.9534605713126e-06	0.000351310223326009	0.000299871506095635	CBL/MIOS/TRIM24/PRKAA1/TBL2/MAP1LC3A/VPS41/USP33/WIPI2/PRKAA2/ATG7/MAP1LC3B/RNF167/GABARAPL1/PIK3R4/GABARAP/WDR45B/ZC3H12A	18
GO:0035861	CC	GO:0035861	site of double-strand break	10/437	77/19869	7.03568917500729e-06	0.000272984739990283	0.000228845047902869	VCP/DDB1/ARPC1A/UFL1/PHF1/RNF8/WDR70/RNF138/RNF168/ZBTB7A	10
GO:0034450	MF	GO:0034450	ubiquitin-ubiquitin ligase activity	5/434	13/18432	7.78783891857506e-06	0.000110788289131987	8.96460914566026e-05	STUB1/PELI2/RBX1/PELI1/AMFR	5
GO:0042594	BP	GO:0042594	response to starvation	17/434	211/18903	8.03313336747588e-06	0.000399709242102891	0.000341183957856272	CBL/MIOS/PRKAA1/TBL2/MAP1LC3A/VPS41/USP33/WIPI2/PRKAA2/ATG7/MAP1LC3B/RNF167/GABARAPL1/PIK3R4/GABARAP/WDR45B/ZC3H12A	17
GO:0001784	MF	GO:0001784	phosphotyrosine residue binding	8/434	46/18432	1.05454520765976e-05	0.000145329511430611	0.000117595666248901	GRAP2/CBL/PLCG2/ABL1/ABL2/CBLC/NCK2/SOCS3	8
GO:0031668	BP	GO:0031668	cellular response to extracellular stimulus	19/434	262/18903	1.09114813313414e-05	0.000534825443166046	0.000456516493092884	CBL/MIOS/TRIM24/PRKAA1/TBL2/MAP1LC3A/VPS41/USP33/WIPI2/PRKAA2/ATG7/MAP1LC3B/LYN/RNF167/GABARAPL1/PIK3R4/GABARAP/WDR45B/ZC3H12A	19
GO:0044322	CC	GO:0044322	endoplasmic reticulum quality control compartment	6/437	25/19869	1.35831201393433e-05	0.000479113692187744	0.000401644413689672	SYVN1/RNF185/RNF103/FBXO6/RNF139/AMFR	6
GO:1904380	BP	GO:1904380	endoplasmic reticulum mannose trimming	5/434	15/18903	1.54805839119918e-05	0.000747621140690898	0.000638154720706411	SYVN1/RNF185/RNF103/RNF139/AMFR	5
GO:0019985	BP	GO:0019985	translesion synthesis	6/434	25/18903	1.72992586950755e-05	0.000823344428327942	0.000702790631655013	POLK/FAAP20/VCP/USP10/ZBTB1/POLI	6
GO:0016607	CC	GO:0016607	nuclear speck	24/437	419/19869	2.10891093354431e-05	0.000681881201845992	0.000571625858302799	SART1/ZNF106/JADE1/PRPF8/ZBTB16/PACSIN2/PRKAA1/INPPL1/FBXL4/BARD1/TRIP12/PIAS2/PRKAA2/CBX4/POLI/NUP43/RNF34/THOC3/RBBP6/TRIM22/USP36/TAF5L/SMU1/TRIM69	24
GO:0022411	BP	GO:0022411	cellular component disassembly	27/434	483/18903	2.12434650090783e-05	0.00099662198699733	0.000850696952168053	MID1/PRKAA1/TOM1/VCP/RNF41/MAP1LC3A/FBXL4/UBQLN1/UBA5/WIPI2/PRKAA2/ATG3/UFL1/UFC1/ATG7/MAP1LC3B/WDR1/SPTAN1/GABARAPL1/MUL1/PIK3R4/GABARAP/SH3GL1/USP36/NEDD9/WDR45B/FBXW7	27
GO:0046935	MF	GO:0046935	1-phosphatidylinositol-3-kinase regulator activity	5/434	16/18432	2.49297633634523e-05	0.000333152292220681	0.000269575431585656	SOCS4/SOCS2/SOCS5/SOCS6/SOCS3	5
GO:0030674	MF	GO:0030674	protein-macromolecule adaptor activity	22/434	347/18432	2.75079759909239e-05	0.000356794629764631	0.000288706001886168	VHL/SH3RF1/SOCS2/CUL4B/GNB2/GNB1/FBXO42/DCAF7/STUB1/DDB1/BTRC/TRPC4AP/CUL5/BFAR/ABI1/TRIM22/NCK1/FUS/GNB5/NCK2/FBXW7/AMFR	22
GO:0000731	BP	GO:0000731	DNA synthesis involved in DNA repair	7/434	40/18903	3.1024913966837e-05	0.00143501151362103	0.00122489764112212	POLK/FAAP20/VCP/WRNIP1/USP10/ZBTB1/POLI	7
GO:0005942	CC	GO:0005942	phosphatidylinositol 3-kinase complex	6/437	29/19869	3.38162842575385e-05	0.00100928602245576	0.000846091646605619	SOCS4/SOCS2/SOCS5/PIK3R4/SOCS6/SOCS3	6
GO:0060828	BP	GO:0060828	regulation of canonical Wnt signaling pathway	18/434	260/18903	3.43897820838364e-05	0.00155379099697938	0.00132628547501638	LATS1/JADE1/VCP/USP47/BTRC/RBX1/XIAP/TBL1XR1/USP8/SRC/RNF220/ZNRF3/LATS2/UBAC2/TLE4/CYLD/TLE2/AMFR	18
GO:0043433	BP	GO:0043433	negative regulation of DNA-binding transcription factor activity	15/434	190/18903	3.4539203038823e-05	0.00155379099697938	0.00132628547501638	TAF3/NWD1/TRIM37/RLIM/BTRC/PIAS4/TRAF3/WWP2/UFL1/FAF1/PELI1/RNF2/CYLD/TNFAIP3/ZC3H12A	15
GO:0032183	MF	GO:0032183	SUMO binding	5/434	17/18432	3.46359818614171e-05	0.00042429077780236	0.00034332157459124	HERC2/USP25/TOLLIP/USPL1/CBX4	5
GO:0070628	MF	GO:0070628	proteasome binding	5/434	17/18432	3.46359818614171e-05	0.00042429077780236	0.00034332157459124	USP13/RAD23B/BAG6/USP14/UCHL5	5
GO:0032451	MF	GO:0032451	demethylase activity	7/434	40/18432	3.64007612293166e-05	0.000433857721679152	0.000351062818114888	KDM5D/KDM5B/PHF8/PHF2/KDM5C/KDM2A/KDM7A	7
GO:2001020	BP	GO:2001020	regulation of response to DNA damage stimulus	20/434	312/18903	3.84569488958957e-05	0.00169053905352543	0.00144301093003981	UBE2V1/ING3/NSD2/NSMCE1/USP47/BARD1/USP22/TRIP12/PIAS4/WRNIP1/UBE2V2/ABL1/UCHL5/ING2/RNF8/OTUB1/FUS/RNF168/TAF5L/MDM2	20
GO:0033143	BP	GO:0033143	regulation of intracellular steroid hormone receptor signaling pathway	9/434	72/18903	3.86085350226574e-05	0.00169053905352543	0.00144301093003981	LATS1/KDM5D/TRIM68/UBA5/RNF14/PIAS2/UFL1/SRC/ZBTB7A	9
GO:0043551	BP	GO:0043551	regulation of phosphatidylinositol 3-kinase activity	8/434	56/18903	3.91551933130214e-05	0.00169191651105214	0.0014441867007282	SOCS4/SOCS2/SOCS5/SRC/LYN/PIK3R4/SOCS6/SOCS3	8
GO:0017124	MF	GO:0017124	SH3 domain binding	12/434	125/18432	3.98493267645864e-05	0.000462461923767964	0.000374208359368277	ZNF106/CBL/CD2AP/INPPL1/TOM1L1/ABL1/EPS15/USP8/ABI1/LYN/OSTF1/CBLC	12
GO:0034138	BP	GO:0034138	toll-like receptor 3 signaling pathway	5/434	18/18903	4.17225797267822e-05	0.00173439179522472	0.00148044276898629	TNIP2/WDFY1/UBQLN1/PELI1/TNFAIP3	5
GO:0036507	BP	GO:0036507	protein demannosylation	5/434	18/18903	4.17225797267822e-05	0.00173439179522472	0.00148044276898629	SYVN1/RNF185/RNF103/RNF139/AMFR	5
GO:0036508	BP	GO:0036508	protein alpha-1,2-demannosylation	5/434	18/18903	4.17225797267822e-05	0.00173439179522472	0.00148044276898629	SYVN1/RNF185/RNF103/RNF139/AMFR	5
GO:0030522	BP	GO:0030522	intracellular receptor signaling pathway	18/434	266/18903	4.63709420796051e-05	0.00190352717236779	0.00162481340471037	LATS1/KDM5D/TRIM68/NEDD4/TRIM24/UBA5/RNF14/PIAS2/XIAP/UFL1/RNF34/USP15/SRC/ARNT/ZBTB7A/CYLD/TNFAIP3/BIRC3	18
GO:0007176	BP	GO:0007176	regulation of epidermal growth factor-activated receptor activity	6/434	30/18903	5.26266755133966e-05	0.00210763417543896	0.00179903513340405	CBL/SOCS4/SOCS5/CBLC/NCK2/FBXW7	6
GO:1902914	BP	GO:1902914	regulation of protein polyubiquitination	6/434	30/18903	5.26266755133966e-05	0.00210763417543896	0.00179903513340405	UBE2V1/TRIP12/UBE2V2/XIAP/OTUB1/GABARAP	6
GO:0072666	BP	GO:0072666	establishment of protein localization to vacuole	8/434	59/18903	5.75617016913337e-05	0.00227750154643783	0.00194403058470541	NEDD4/VPS41/STAM/STAM2/UBAP1/PIK3R4/SMURF1/TNFAIP3	8
GO:1903573	BP	GO:1903573	negative regulation of response to endoplasmic reticulum stress	7/434	44/18903	5.8921818749513e-05	0.00230356253301668	0.00196627573095179	USP14/SYVN1/USP25/UFL1/BFAR/NCK1/NCK2	7
GO:0035014	MF	GO:0035014	phosphatidylinositol 3-kinase regulator activity	5/434	19/18432	6.2600765321286e-05	0.000707870192479157	0.000572784330470066	SOCS4/SOCS2/SOCS5/SOCS6/SOCS3	5
GO:0032088	BP	GO:0032088	negative regulation of NF-kappaB transcription factor activity	10/434	95/18903	6.50772448928719e-05	0.00251427849680225	0.0021461387386962	NWD1/TRIM37/PIAS4/TRAF3/UFL1/FAF1/PELI1/CYLD/TNFAIP3/ZC3H12A	10
GO:0061097	BP	GO:0061097	regulation of protein tyrosine kinase activity	10/434	96/18903	7.11812212722815e-05	0.00271812942625782	0.00232014188798147	CBL/SOCS4/IBTK/SOCS5/SRC/ABI1/NEDD9/CBLC/NCK2/FBXW7	10
GO:0005680	CC	GO:0005680	anaphase-promoting complex	5/437	21/19869	7.65073854963485e-05	0.0021203475408988	0.00177750241491516	CDC27/CUL7/ANAPC13/ANAPC5/UBE2S	5
GO:0071496	BP	GO:0071496	cellular response to external stimulus	20/434	328/18903	7.70781391863806e-05	0.00290947826538016	0.00248347349852791	CBL/MIOS/TRIM24/PRKAA1/TBL2/MAP1LC3A/VPS41/USP33/WIPI2/PRKAA2/ATG7/MAP1LC3B/LYN/RNF167/GABARAPL1/PIK3R4/GABARAP/MAP3K1/WDR45B/ZC3H12A	20
GO:0051607	BP	GO:0051607	defense response to virus	19/434	304/18903	8.37719432913958e-05	0.00312621661101073	0.00266847709312186	ISG15/TRIM27/HERC5/TRAF3/ATG16L1/RNF185/TRAF3IP2/TRIM11/ATG7/TRIM52/USP15/TRIM22/MUL1/TRIM41/TRIM8/TRIM38/TNFAIP3/BIRC3/ZC3H12A	19
GO:0031519	CC	GO:0031519	PcG protein complex	6/437	34/19869	8.72404350803738e-05	0.002256619254079	0.00189173996069021	PCGF2/UBAP2L/CBX4/RBBP7/EED/RNF2	6
GO:0140546	BP	GO:0140546	defense response to symbiont	19/434	305/18903	8.74846127703012e-05	0.00322808391390639	0.00275542902196703	ISG15/TRIM27/HERC5/TRAF3/ATG16L1/RNF185/TRAF3IP2/TRIM11/ATG7/TRIM52/USP15/TRIM22/MUL1/TRIM41/TRIM8/TRIM38/TNFAIP3/BIRC3/ZC3H12A	19
GO:0061665	MF	GO:0061665	SUMO ligase activity	4/434	11/18432	8.77301467229997e-05	0.000967224867621071	0.000782645256292023	RANBP2/PIAS4/PIAS2/CBX4	4
GO:0031648	BP	GO:0031648	protein destabilization	7/434	48/18903	0.000104616615217302	0.00381734404859576	0.00325840989852251	FBXW11/BTRC/SRC/MUL1/RNF139/FBXW7/MDM2	7
GO:0060070	BP	GO:0060070	canonical Wnt signaling pathway	19/434	310/18903	0.000108318498819572	0.00390898846289531	0.00333663577046292	LATS1/JADE1/VCP/USP47/BTRC/RBX1/XIAP/TBL1XR1/USP8/SRC/RNF220/SIAH1/ZNRF3/LATS2/UBAC2/TLE4/CYLD/TLE2/AMFR	19
GO:0002221	BP	GO:0002221	pattern recognition receptor signaling pathway	14/434	187/18903	0.000110907699267324	0.00395892265645535	0.00337925861726412	TNIP1/PLCG2/TNIP2/WDFY1/UBQLN1/PJA2/TRAF3/XIAP/USP15/LYN/PELI1/CYLD/TNFAIP3/BIRC3	14
GO:0033235	BP	GO:0033235	positive regulation of protein sumoylation	4/434	12/18903	0.00011719296395858	0.00413829778107502	0.00353236970030219	PIAS4/TOLLIP/ARNT/MUL1	4
GO:0006282	BP	GO:0006282	regulation of DNA repair	15/434	212/18903	0.000120100858313089	0.00419065738864164	0.00357706283285874	UBE2V1/ING3/NSD2/BARD1/USP22/TRIP12/PIAS4/WRNIP1/UBE2V2/UCHL5/RNF8/OTUB1/FUS/RNF168/TAF5L	15
GO:0072594	BP	GO:0072594	establishment of protein localization to organelle	24/434	449/18903	0.000121227908623921	0.00419065738864164	0.00357706283285874	PEX10/PEX7/NEDD4/SSR3/PRKAA1/RANBP2/VPS41/BAG6/STAM/LRSAM1/CDH1/UBE2L3/STAM2/UBL4A/UBAP1/TRAF3IP2/FAM53C/PIK3R4/ING1/USP36/SMURF1/FBXW7/TNFAIP3/ZC3H12A	24
GO:0010508	BP	GO:0010508	positive regulation of autophagy	12/434	144/18903	0.000124380846529392	0.00425486145835961	0.00363186616565537	TRIM68/PRKAA1/TOM1/TRIM27/LRSAM1/ATG16L1/PRKAA2/UFL1/TRIM22/TRIM8/TRIM38/ZC3H12A	12
GO:0002224	BP	GO:0002224	toll-like receptor signaling pathway	11/434	123/18903	0.000126461088930067	0.00428142490769423	0.00365454020424057	TNIP1/PLCG2/TNIP2/WDFY1/UBQLN1/PJA2/TRAF3/LYN/PELI1/TNFAIP3/BIRC3	11
GO:0003713	MF	GO:0003713	transcription coactivator activity	18/434	281/18432	0.000128312509252442	0.00138014186781286	0.00111676355934732	JADE1/TRIM37/TRIM24/DCAF6/PHF2/TRIM27/RNF14/USP22/UBE2L3/MPND/ABL1/TRIM52/TRIM22/FUS/TRIM8/TAF5L/TRIM38/YAF2	18
GO:1905898	BP	GO:1905898	positive regulation of response to endoplasmic reticulum stress	6/434	35/18903	0.0001305591882503	0.00434759721310272	0.00371102358436199	USP13/UBQLN1/BAG6/RNF185/NCK1/NCK2	6
GO:0031397	BP	GO:0031397	negative regulation of protein ubiquitination	9/434	84/18903	0.000131063375181842	0.00434759721310272	0.00371102358436199	USP4/SPOPL/ISG15/TRIP12/ABL1/UFL1/OTUB1/TNFAIP3/IVNS1ABP	9
GO:0038127	BP	GO:0038127	ERBB signaling pathway	11/434	126/18903	0.000156799984771581	0.00514931149989871	0.00439535115207073	CBL/SOCS4/SOCS5/STUB1/CUL5/ABL1/WDR54/SRC/CBLC/NCK2/FBXW7	11
GO:0043550	BP	GO:0043550	regulation of lipid kinase activity	8/434	68/18903	0.000160302168513426	0.00521220120196129	0.00444903256645392	SOCS4/SOCS2/SOCS5/SRC/LYN/PIK3R4/SOCS6/SOCS3	8
GO:2001233	BP	GO:2001233	regulation of apoptotic signaling pathway	21/434	374/18903	0.000163574796678692	0.00526646698326297	0.0044953527714691	SH3RF1/PCGF2/UBQLN1/USP47/SYVN1/PIAS4/RFFL/BIRC6/ING2/RNF34/SRC/SIAH1/FAF1/NCK1/CYLD/NCK2/FBXW7/FXN/TNFAIP3/IVNS1ABP/MDM2	21
GO:0098792	BP	GO:0098792	xenophagy	4/434	13/18903	0.000166215749418924	0.00529953903972569	0.00452358242925493	RNF213/LRSAM1/WIPI2/ATG16L1	4
GO:0002039	MF	GO:0002039	p53 binding	8/434	67/18432	0.000171286454854697	0.00179850777597432	0.00145529093222412	TAF3/TRIM24/USP10/RFFL/RNF34/MUL1/MDM4/MDM2	8
GO:2001242	BP	GO:2001242	regulation of intrinsic apoptotic signaling pathway	13/434	172/18903	0.000176156473547896	0.00556247941472395	0.00474802316860372	UBQLN1/USP47/SYVN1/PIAS4/ING2/SRC/SIAH1/NCK1/CYLD/NCK2/FBXW7/IVNS1ABP/MDM2	13
GO:0034644	BP	GO:0034644	cellular response to UV	9/434	89/18903	0.000204605714056034	0.00639928728533349	0.00546230593013754	POLK/CUL4B/NEDD4/USP47/DDB1/RBX1/ZBTB1/DDB2/USP28	9
GO:0007175	BP	GO:0007175	negative regulation of epidermal growth factor-activated receptor activity	4/434	14/18903	0.000228494669772408	0.0070128644442298	0.00598604334091415	CBL/SOCS4/SOCS5/CBLC	4
GO:1904294	BP	GO:1904294	positive regulation of ERAD pathway	4/434	14/18903	0.000228494669772408	0.0070128644442298	0.00598604334091415	USP13/UBQLN1/BAG6/RNF185	4
GO:0051092	BP	GO:0051092	positive regulation of NF-kappaB transcription factor activity	12/434	154/18903	0.000233935812083483	0.00711338154520516	0.00607184276392119	UBE2V1/PLCG2/TRIM68/TRIM37/TRIM27/MALT1/PRKCI/TRIM52/TRIM22/TRIM8/TRIM38/ZBTB7A	12
GO:0006517	BP	GO:0006517	protein deglycosylation	5/434	26/18903	0.000275301930862879	0.00821901400866995	0.00701558891758705	SYVN1/RNF185/RNF103/RNF139/AMFR	5
GO:0035872	BP	GO:0035872	nucleotide-binding domain, leucine rich repeat containing receptor signaling pathway	5/434	26/18903	0.000275301930862879	0.00821901400866995	0.00701558891758705	XIAP/RNF34/CYLD/TNFAIP3/BIRC3	5
GO:1900102	BP	GO:1900102	negative regulation of endoplasmic reticulum unfolded protein response	4/434	15/18903	0.000305954337358014	0.00905183823318665	0.00772647131706393	UFL1/BFAR/NCK1/NCK2	4
GO:0097602	MF	GO:0097602	cullin family protein binding	5/434	26/18432	0.00030914305194576	0.0031705136257693	0.00256547110427448	KLHL36/KLHL9/DDB1/KCTD2/RBX1	5
GO:0030518	BP	GO:0030518	intracellular steroid hormone receptor signaling pathway	10/434	116/18903	0.00034294286604786	0.0100555747509033	0.00858324109290837	LATS1/KDM5D/TRIM68/NEDD4/UBA5/RNF14/PIAS2/UFL1/SRC/ZBTB7A	10
GO:0050732	BP	GO:0050732	negative regulation of peptidyl-tyrosine phosphorylation	7/434	58/18903	0.000350845252551091	0.0101962461006883	0.00870331539397815	CBL/SOCS4/IBTK/SOCS5/PPP2CA/CBLC/SOCS3	7
GO:1903321	BP	GO:1903321	negative regulation of protein modification by small protein conjugation or removal	9/434	96/18903	0.000362515966022447	0.0104430037931379	0.0089139429133682	USP4/SPOPL/ISG15/TRIP12/ABL1/UFL1/OTUB1/TNFAIP3/IVNS1ABP	9
GO:0030864	CC	GO:0030864	cortical actin cytoskeleton	8/437	80/19869	0.000373117087747895	0.00904808937788646	0.0075850776390855	SNX9/CDH1/WDR1/PDLIM2/LLGL2/SPTAN1/LASP1/MYO1E	8
GO:0030968	BP	GO:0030968	endoplasmic reticulum unfolded protein response	8/434	77/18903	0.000381380637750311	0.0108717942238052	0.00927995000256209	VCP/TBL2/STUB1/UFL1/BFAR/NCK1/NCK2/AMFR	8
GO:0035966	BP	GO:0035966	response to topologically incorrect protein	12/434	163/18903	0.000394223637699679	0.0108717942238052	0.00927995000256209	VCP/TBL2/BAG6/STUB1/DNAJB2/RNF185/UFL1/BFAR/FBXO6/NCK1/NCK2/AMFR	12
GO:0006515	BP	GO:0006515	protein quality control for misfolded or incompletely synthesized proteins	5/434	28/18903	0.000396079421738324	0.0108717942238052	0.00927995000256209	FBXL17/VCP/BAG6/STUB1/RNF185	5
GO:0032801	BP	GO:0032801	receptor catabolic process	5/434	28/18903	0.000396079421738324	0.0108717942238052	0.00927995000256209	NEDD4/PIK3R4/ZNRF3/RNF43/SMURF1	5
GO:0060765	BP	GO:0060765	regulation of androgen receptor signaling pathway	5/434	28/18903	0.000396079421738324	0.0108717942238052	0.00927995000256209	KDM5D/TRIM68/RNF14/PIAS2/ZBTB7A	5
GO:0044804	BP	GO:0044804	autophagy of nucleus	4/434	16/18903	0.000400574634920958	0.0108717942238052	0.00927995000256209	WIPI2/ATG3/ATG7/WDR45B	4
GO:1900044	BP	GO:1900044	regulation of protein K63-linked ubiquitination	4/434	16/18903	0.000400574634920958	0.0108717942238052	0.00927995000256209	UBE2V1/TRIP12/UBE2V2/OTUB1	4
GO:0072665	BP	GO:0072665	protein localization to vacuole	8/434	78/18903	0.000416592131838081	0.0112138406635759	0.00957191412497679	NEDD4/VPS41/STAM/STAM2/UBAP1/PIK3R4/SMURF1/TNFAIP3	8
GO:0007033	BP	GO:0007033	vacuole organization	14/434	213/18903	0.000426517469786349	0.011387669681125	0.00972029115995761	TOM1/MAP1LC3A/UBQLN1/UBXN2B/LRSAM1/WIPI2/ATG16L1/ATG3/ATG7/MAP1LC3B/GABARAPL1/GABARAP/WDR45B/SMURF1	14
GO:1990380	MF	GO:1990380	Lys48-specific deubiquitinase activity	4/434	16/18432	0.00044062678629025	0.00441628210804546	0.00357350431943528	USP13/MINDY3/OTUD7B/USP15	4
GO:0035967	BP	GO:0035967	cellular response to topologically incorrect protein	10/434	120/18903	0.000449984341384705	0.011821988616859	0.010091017272484	VCP/TBL2/BAG6/STUB1/RNF185/UFL1/BFAR/NCK1/NCK2/AMFR	10
GO:0042752	BP	GO:0042752	regulation of circadian rhythm	10/434	120/18903	0.000449984341384705	0.011821988616859	0.010091017272484	FBXW11/FBXL8/PRKAA1/FBXL17/DDB1/BTRC/PRKAA2/ATG7/KDM2A/FBXW7	10
GO:0002102	CC	GO:0002102	podosome	5/437	30/19869	0.000455233621374704	0.0103900379466697	0.00871004266283489	WDR1/SRC/SH3PXD2A/SH3GL1/ASAP1	5
GO:0002020	MF	GO:0002020	protease binding	11/434	139/18432	0.00045624748437636	0.00447122534688833	0.00361796250768622	VCP/BAG6/SYVN1/MALT1/RFFL/BFAR/SH3PXD2A/RNF139/UBC/TNFAIP3/AMFR	11
GO:0050730	BP	GO:0050730	regulation of peptidyl-tyrosine phosphorylation	16/434	266/18903	0.000457728793869996	0.0119300107862624	0.0101832228744845	CBL/SOCS4/PLCG2/TNK2/IBTK/SOCS5/ABL1/PPP2CA/SRC/ABI1/LYN/NEDD9/CBLC/NCK2/FBXW7/SOCS3	16
GO:0016706	MF	GO:0016706	2-oxoglutarate-dependent dioxygenase activity	7/434	60/18432	0.000503282820968375	0.00482495052276203	0.00390418481254643	KDM5D/KDM5B/PHF8/PHF2/KDM5C/KDM2A/KDM7A	7
GO:0034134	BP	GO:0034134	toll-like receptor 2 signaling pathway	4/434	17/18903	0.00051437903971672	0.0131970372377321	0.0112647317661647	TNIP2/PJA2/LYN/TNFAIP3	4
GO:1902916	BP	GO:1902916	positive regulation of protein polyubiquitination	4/434	17/18903	0.00051437903971672	0.0131970372377321	0.0112647317661647	UBE2V1/UBE2V2/XIAP/GABARAP	4
GO:0046875	MF	GO:0046875	ephrin receptor binding	5/434	29/18432	0.000526624036528008	0.00494130212997556	0.00399833255057099	CBL/ABL1/SRC/LYN/NCK1	5
GO:0009615	BP	GO:0009615	response to virus	21/434	409/18903	0.000539959870971342	0.0137459551648828	0.0117332773267783	ISG15/TRIM27/HERC5/TRAF3/ATG16L1/RNF185/TRAF3IP2/TRIM11/ATG7/TRIM52/USP15/SRC/TRIM22/MUL1/TRIM41/TRIM8/TRIM38/TNFAIP3/BIRC3/ZC3H12A/IVNS1ABP	21
GO:0001222	MF	GO:0001222	transcription corepressor binding	6/434	44/18432	0.0005446292707753	0.00500378142524807	0.00404888865773742	BCL6/ZBTB16/PHF1/MTF2/EED/ZBTB7A	6
GO:0071482	BP	GO:0071482	cellular response to light stimulus	10/434	123/18903	0.000547333067337044	0.0138264753318066	0.0118020077596644	POLK/CUL4B/NEDD4/USP47/DDB1/RBX1/ZBTB1/DDB2/GNB5/USP28	10
GO:0043254	BP	GO:0043254	regulation of protein-containing complex assembly	21/434	410/18903	0.000557305274617596	0.0139709200140778	0.0119253029032275	LATS1/PLCG2/ISG15/STXBP5/VCP/VPS41/PREB/STUB1/SENP6/SNX9/ABL1/ARHGEF7/ARPC1A/SRC/FAF1/SPTAN1/ARPC1B/NCK1/ASAP1/EML2/NCK2	21
GO:0097193	BP	GO:0097193	intrinsic apoptotic signaling pathway	17/434	298/18903	0.000562835529508199	0.0140026657492797	0.0119524004392371	UBQLN1/USP47/BAG6/SYVN1/PIAS4/CUL5/ABL1/ING2/SRC/SIAH1/NCK1/USP28/CYLD/NCK2/FBXW7/IVNS1ABP/MDM2	17
GO:0046596	BP	GO:0046596	regulation of viral entry into host cell	6/434	46/18903	0.000609046347367449	0.0150384075545466	0.0128364892998775	TRIM68/TRIM27/TRIM11/TRIM22/TRIM8/TRIM38	6
GO:0045623	BP	GO:0045623	negative regulation of T-helper cell differentiation	4/434	18/18903	0.000649423742570989	0.0157978338563195	0.0134847206742031	BCL6/SOCS5/RC3H1/ZC3H12A	4
GO:0072673	BP	GO:0072673	lamellipodium morphogenesis	4/434	18/18903	0.000649423742570989	0.0157978338563195	0.0134847206742031	CORO1B/ARHGEF7/SRC/ABI1	4
GO:0009411	BP	GO:0009411	response to UV	11/434	149/18903	0.000665945769055115	0.0160806316586544	0.0137261113234812	POLK/CUL4B/NEDD4/PRKAA1/USP47/DDB1/RBX1/ZBTB1/UBE2A/DDB2/USP28	11
GO:0030178	BP	GO:0030178	negative regulation of Wnt signaling pathway	12/434	174/18903	0.000707793277169418	0.0169663731549224	0.0144821628667089	LATS1/RNF213/JADE1/RBX1/ZNRF3/LATS2/UBAC2/TLE4/RNF43/CYLD/TLE2/AMFR	12
GO:0051443	BP	GO:0051443	positive regulation of ubiquitin-protein transferase activity	5/434	32/18903	0.000752635032816714	0.0177553227076801	0.015155594708171	STUB1/BTRC/UBE2L3/UBE2S/FBXW7	5
GO:0061099	BP	GO:0061099	negative regulation of protein tyrosine kinase activity	5/434	32/18903	0.000752635032816714	0.0177553227076801	0.015155594708171	CBL/SOCS4/IBTK/SOCS5/CBLC	5
GO:0034504	BP	GO:0034504	protein localization to nucleus	17/434	306/18903	0.000756926059401708	0.0177553227076801	0.015155594708171	LATS1/CD2AP/TAF3/ZBTB16/RANBP2/BARD1/OTUD7B/CDH1/TRAF3IP2/SRC/FAM53C/TRIM8/ING1/LATS2/ZBTB7A/ZC3H12A/MDM2	17
GO:0062207	BP	GO:0062207	regulation of pattern recognition receptor signaling pathway	9/434	107/18903	0.000803816053629742	0.018721502979575	0.0159803072102725	WDFY1/UBQLN1/PJA2/XIAP/USP15/LYN/PELI1/TNFAIP3/BIRC3	9
GO:0001782	BP	GO:0001782	B cell homeostasis	5/434	33/18903	0.000870496522674446	0.020131764651147	0.0171840788723651	ABL1/TRAF3IP2/LYN/RC3H1/TNFAIP3	5
GO:0046854	BP	GO:0046854	phosphatidylinositol phosphate biosynthetic process	7/434	68/18903	0.00092962262052083	0.0213488159845483	0.0182229299848875	SOCS4/SOCS2/PI4K2B/SOCS5/PIK3R4/SOCS6/SOCS3	7
GO:0035591	MF	GO:0035591	signaling adaptor activity	8/434	86/18432	0.000945471378762615	0.00850924240886354	0.00688538769925943	SH3RF1/SOCS2/GNB2/GNB1/ABI1/NCK1/GNB5/NCK2	8
GO:0070304	BP	GO:0070304	positive regulation of stress-activated protein kinase signaling cascade	10/434	132/18903	0.000949101294726637	0.021644782304738	0.0184755610223467	SH3RF1/MID1/PJA2/MAP3K3/TRAF3/RNF13/XIAP/LYN/TRAF4/ZC3H12A	10
GO:0007173	BP	GO:0007173	epidermal growth factor receptor signaling pathway	9/434	110/18903	0.000980225763101715	0.0222004234898347	0.0189498454238829	CBL/SOCS4/SOCS5/ABL1/WDR54/SRC/CBLC/NCK2/FBXW7	9
GO:0097320	BP	GO:0097320	plasma membrane tubulation	4/434	20/18903	0.000991562341426784	0.0223033611592162	0.0190377109965359	FNBP1L/PACSIN2/SNX9/ASAP1	4
GO:0098687	CC	GO:0098687	chromosomal region	19/437	388/19869	0.00103861598144542	0.0223879444889346	0.0187679729980488	FBXW11/AHCTF1/NSMCE1/FBXO28/ZBTB10/PHF2/DDB1/UHRF2/PSEN2/WRNIP1/NUP43/WDR82/PPP2CA/RBBP7/RNF8/THOC3/ZBTB48/NUP37/CHD4	19
GO:0043124	BP	GO:0043124	negative regulation of I-kappaB kinase/NF-kappaB signaling	6/434	51/18903	0.00106343798046172	0.0236342338222752	0.0201737177603433	TNIP1/OTUD7B/USP10/ABL1/TNFAIP3/ZC3H12A	6
GO:0006661	BP	GO:0006661	phosphatidylinositol biosynthetic process	10/434	134/18903	0.00106512381415857	0.0236342338222752	0.0201737177603433	SOCS4/PLCG2/SOCS2/INPPL1/PI4K2B/SOCS5/SH3YL1/PIK3R4/SOCS6/SOCS3	10
GO:0030100	BP	GO:0030100	regulation of endocytosis	13/434	209/18903	0.00112672820430652	0.0248333921002859	0.0211972957122448	CBL/CD2AP/PLCG2/NEDD4L/PACSIN2/TNK2/LRSAM1/ABL1/WDR54/ABL2/ANKRD13D/SRC/AHI1	13
GO:0043401	BP	GO:0043401	steroid hormone mediated signaling pathway	10/434	136/18903	0.00119249798563311	0.0261077558987943	0.0222850676192349	LATS1/KDM5D/TRIM68/NEDD4/UBA5/RNF14/PIAS2/UFL1/SRC/ZBTB7A	10
GO:0045821	BP	GO:0045821	positive regulation of glycolytic process	4/434	21/18903	0.00120284461700796	0.0261598789553255	0.0223295588364741	PRKAA1/PRKAA2/ZBTB20/ARNT	4
GO:0008022	MF	GO:0008022	protein C-terminus binding	12/434	181/18432	0.00123806624436735	0.0109197442753201	0.00883588330190596	CD2AP/ZBTB16/TRIM3/PRKAA1/MYO1C/PIAS4/ABL1/PPP2CA/SRC/SIAH1/EML2/TNFAIP3	12
GO:0005635	CC	GO:0005635	nuclear envelope	22/437	488/19869	0.00126971064198044	0.0259288278467584	0.0217363206854269	FBXW11/AHCTF1/TAF3/RANBP2/PARP11/MYO1C/PHF8/MINDY3/TRIM27/RNF13/PSEN2/DNAJB2/ZBTB1/ABL1/NUP43/FAF1/WDR3/RNF180/NUP37/RAB40B/RNF43/DTX2	22
GO:0035871	BP	GO:0035871	protein K11-linked deubiquitination	3/434	10/18903	0.00127894986757389	0.0272731906825497	0.0232798598588467	OTUD7B/OTUD3/TNFAIP3	3
GO:0070544	BP	GO:0070544	histone H3-K36 demethylation	3/434	10/18903	0.00127894986757389	0.0272731906825497	0.0232798598588467	PHF8/KDM2A/KDM7A	3
GO:0097201	BP	GO:0097201	negative regulation of transcription from RNA polymerase II promoter in response to stress	3/434	10/18903	0.00127894986757389	0.0272731906825497	0.0232798598588467	VHL/NCK1/NCK2	3
GO:0052372	BP	GO:0052372	modulation by symbiont of entry into host	6/434	53/18903	0.00130443822346941	0.0275120449773049	0.0234837411932056	TRIM68/TRIM27/TRIM11/TRIM22/TRIM8/TRIM38	6
GO:1903580	BP	GO:1903580	positive regulation of ATP metabolic process	5/434	36/18903	0.00130690591244201	0.0275120449773049	0.0234837411932056	PRKAA1/VCP/PRKAA2/ZBTB20/ARNT	5
GO:1990381	MF	GO:1990381	ubiquitin-specific protease binding	4/434	21/18432	0.00132005015009351	0.0114145512978674	0.00923626420808465	VCP/BAG6/SYVN1/AMFR	4
GO:0051864	MF	GO:0051864	histone H3-methyl-lysine-36 demethylase activity	3/434	10/18432	0.00137526779382958	0.0114432659826197	0.00925949914812769	PHF8/KDM2A/KDM7A	3
GO:0097027	MF	GO:0097027	ubiquitin-protein transferase activator activity	3/434	10/18432	0.00137526779382958	0.0114432659826197	0.00925949914812769	BTRC/UBE2L3/FBXW7	3
GO:0046637	BP	GO:0046637	regulation of alpha-beta T cell differentiation	7/434	73/18903	0.00141675641397835	0.0295319549837627	0.0252078966990704	BCL6/ZBTB16/SH3RF1/SOCS5/MALT1/RC3H1/ZC3H12A	7
GO:0006354	BP	GO:0006354	DNA-templated transcription elongation	14/434	241/18903	0.00142084314477299	0.0295319549837627	0.0252078966990704	VHL/PHF8/PHF2/PIAS4/PIAS2/ELOA/WDR82/RNF8/FUS/RNF168/WDR43/KDM2A/YAF2/KDM7A	14
GO:0032785	BP	GO:0032785	negative regulation of DNA-templated transcription, elongation	4/434	22/18903	0.00144372714925355	0.0295725336698194	0.0252425338684303	VHL/WDR82/RNF8/RNF168	4
GO:0043371	BP	GO:0043371	negative regulation of CD4-positive, alpha-beta T cell differentiation	4/434	22/18903	0.00144372714925355	0.0295725336698194	0.0252425338684303	BCL6/SOCS5/RC3H1/ZC3H12A	4
GO:0071478	BP	GO:0071478	cellular response to radiation	12/434	189/18903	0.00145005394602637	0.0295725336698194	0.0252425338684303	POLK/CUL4B/NEDD4/USP47/BARD1/DDB1/RBX1/ZBTB1/DDB2/GNB5/USP28/MDM2	12
GO:0006605	BP	GO:0006605	protein targeting	17/434	325/18903	0.00145881560734188	0.0295725336698194	0.0252425338684303	PEX10/PEX7/NEDD4/SSR3/PRKAA1/MYO1C/VPS41/BAG6/UBE2L3/UBL4A/ATG3/PRKCI/PIK3R4/GABARAP/USP36/SMURF1/FBXW7	17
GO:0043162	BP	GO:0043162	ubiquitin-dependent protein catabolic process via the multivesicular body sorting pathway	5/434	37/18903	0.00148300271146907	0.029878410456837	0.0255036242857096	NEDD4/STAM/TOM1L1/STAM2/UBAP1	5
GO:0060090	MF	GO:0060090	molecular adaptor activity	23/434	492/18432	0.00149171371644512	0.0121823286843018	0.00985752338937415	VHL/SH3RF1/SOCS2/CUL4B/GNB2/GNB1/FBXO42/DCAF7/STUB1/DDB1/BTRC/TRPC4AP/RBX1/CUL5/BFAR/ABI1/TRIM22/NCK1/FUS/GNB5/NCK2/FBXW7/AMFR	23
GO:0050688	BP	GO:0050688	regulation of defense response to virus	7/434	74/18903	0.00153447897691829	0.0305407815769676	0.026069011263371	HERC5/TRAF3/TRAF3IP2/MUL1/TRIM38/TNFAIP3/ZC3H12A	7
GO:0070988	BP	GO:0070988	demethylation	7/434	74/18903	0.00153447897691829	0.0305407815769676	0.026069011263371	KDM5D/KDM5B/PHF8/PHF2/KDM5C/KDM2A/KDM7A	7
GO:0031234	CC	GO:0031234	extrinsic component of cytoplasmic side of plasma membrane	8/437	99/19869	0.0015355040546376	0.0295529681050486	0.024774463224254	GNB2/TNK2/GNB1/SNX9/SRC/LYN/GNB5/CYLD	8
GO:0006986	BP	GO:0006986	response to unfolded protein	10/434	141/18903	0.00156602344416131	0.0307953352732081	0.0262862932984656	VCP/TBL2/STUB1/DNAJB2/UFL1/BFAR/FBXO6/NCK1/NCK2/AMFR	10
GO:0090090	BP	GO:0090090	negative regulation of canonical Wnt signaling pathway	10/434	141/18903	0.00156602344416131	0.0307953352732081	0.0262862932984656	LATS1/JADE1/RBX1/ZNRF3/LATS2/UBAC2/TLE4/CYLD/TLE2/AMFR	10
GO:0009898	CC	GO:0009898	cytoplasmic side of plasma membrane	11/437	173/19869	0.00159951631496397	0.0295529681050486	0.024774463224254	GNB2/TNK2/GNB1/ASPSCR1/SNX9/CDH1/TRAF3/SRC/LYN/GNB5/CYLD	11
GO:0006302	BP	GO:0006302	double-strand break repair	16/434	300/18903	0.00163389525889701	0.0319387620846297	0.0272622999651801	ING3/NSD2/NSMCE1/VCP/FAN1/TRIP12/PIAS4/UBE2V2/RNF8/OTUB1/WDR70/RNF138/FUS/RNF168/KDM2A/ZBTB7A	16
GO:0061629	MF	GO:0061629	RNA polymerase II-specific DNA-binding transcription factor binding	18/434	350/18432	0.00170594937629934	0.0136786122717819	0.0110682648529277	LATS1/KDM5D/TRIM68/TRIM24/RAD23B/RNF14/TRIP12/UHRF2/STRN/PIAS2/RBX1/WWP2/SRC/FAF1/GABARAPL1/ARNT/CHD4/ZBTB7A	18
GO:0071218	BP	GO:0071218	cellular response to misfolded protein	4/434	23/18903	0.0017162916578634	0.0328681399009915	0.0280555986141228	VCP/BAG6/STUB1/RNF185	4
GO:0072584	BP	GO:0072584	caveolin-mediated endocytosis	3/434	11/18903	0.00172871751175095	0.0328681399009915	0.0280555986141228	NEDD4L/PACSIN2/SRC	3
GO:0090085	BP	GO:0090085	regulation of protein deubiquitination	3/434	11/18903	0.00172871751175095	0.0328681399009915	0.0280555986141228	TNIP1/VCP/ZC3H12A	3
GO:2000392	BP	GO:2000392	regulation of lamellipodium morphogenesis	3/434	11/18903	0.00172871751175095	0.0328681399009915	0.0280555986141228	CORO1B/ARHGEF7/SRC	3
GO:0043370	BP	GO:0043370	regulation of CD4-positive, alpha-beta T cell differentiation	6/434	56/18903	0.00174149096917555	0.0328681399009915	0.0280555986141228	BCL6/SH3RF1/SOCS5/MALT1/RC3H1/ZC3H12A	6
GO:0051438	BP	GO:0051438	regulation of ubiquitin-protein transferase activity	6/434	56/18903	0.00174149096917555	0.0328681399009915	0.0280555986141228	STUB1/BTRC/UBE2L3/ABL1/UBE2S/FBXW7	6
GO:0043618	BP	GO:0043618	regulation of transcription from RNA polymerase II promoter in response to stress	5/434	39/18903	0.00188670326147848	0.0354053343468304	0.0302212979567951	VHL/NEDD4/ARNT/NCK1/NCK2	5
GO:0034121	BP	GO:0034121	regulation of toll-like receptor signaling pathway	7/434	77/18903	0.00193381995319842	0.0360833223085433	0.0308000151636806	WDFY1/UBQLN1/PJA2/LYN/PELI1/TNFAIP3/BIRC3	7
GO:0007015	BP	GO:0007015	actin filament organization	21/434	454/18903	0.00198634622651317	0.0368540169936115	0.0314578650086504	LATS1/CD2AP/RHOBTB3/CORO1B/MYO1C/INPPL1/TRIM27/SNX9/ABL1/ARPC1A/PRKCI/WDR1/SRC/ABI1/SPTAN1/ARPC1B/NEBL/NCK1/MYO1E/NEDD9/NCK2	21
GO:1990782	MF	GO:1990782	protein tyrosine kinase binding	9/434	119/18432	0.00202199891593271	0.0159232414629701	0.012884541964308	CBL/PLCG2/RNF41/SOCS5/CDH1/NCK1/NEDD9/CBLC/NCK2	9
GO:0000118	CC	GO:0000118	histone deacetylase complex	7/437	81/19869	0.00203600829708758	0.0359077826940901	0.0301017494641179	ING3/TBL1XR1/ING2/RBBP7/CHD3/ING1/CHD4	7
GO:0043154	BP	GO:0043154	negative regulation of cysteine-type endopeptidase activity involved in apoptotic process	7/434	78/18903	0.002083405794741	0.0384376664602778	0.0328096370869029	SH3RF1/USP47/RFFL/XIAP/RNF34/SRC/BIRC3	7
GO:0034620	BP	GO:0034620	cellular response to unfolded protein	8/434	100/18903	0.00213705810351676	0.0392072559326762	0.0334665435440466	VCP/TBL2/STUB1/UFL1/BFAR/NCK1/NCK2/AMFR	8
GO:0140297	MF	GO:0140297	DNA-binding transcription factor binding	22/434	476/18432	0.00215803280871338	0.016696359098993	0.0135101222927763	LATS1/VHL/KDM5D/BCL6/TRIM68/TRIM24/RAD23B/RNF14/SYVN1/TRIP12/UHRF2/STRN/PIAS2/RBX1/WWP2/SRC/FAF1/GABARAPL1/ARNT/CHD4/ZBTB7A/TLE4	22
GO:0001933	BP	GO:0001933	negative regulation of protein phosphorylation	17/434	338/18903	0.00220610707676371	0.0402491980005113	0.0343559248270279	LATS1/CBL/SOCS4/IBTK/SOCS5/TRIM27/ABL1/PPP2CA/PWP1/LYN/NCK1/LATS2/CBLC/NCK2/TNFAIP3/ZC3H12A/SOCS3	17
GO:0016605	CC	GO:0016605	PML body	8/437	105/19869	0.00223204323907194	0.0376535989895615	0.0315652796738321	ZBTB16/KLHL20/TRIM27/SATB1/PIAS4/PIAS2/CHD3/TRIM8	8
GO:0002327	BP	GO:0002327	immature B cell differentiation	3/434	12/18903	0.00226589236101508	0.0404998714327838	0.0345698947450167	SYVN1/ABL1/TRAF3IP2	3
GO:0034135	BP	GO:0034135	regulation of toll-like receptor 2 signaling pathway	3/434	12/18903	0.00226589236101508	0.0404998714327838	0.0345698947450167	PJA2/LYN/TNFAIP3	3
GO:0071712	BP	GO:0071712	ER-associated misfolded protein catabolic process	3/434	12/18903	0.00226589236101508	0.0404998714327838	0.0345698947450167	VCP/BAG6/RNF185	3
GO:0043903	BP	GO:0043903	regulation of biological process involved in symbiotic interaction	6/434	59/18903	0.00228150920068971	0.0404998714327838	0.0345698947450167	TRIM68/TRIM27/TRIM11/TRIM22/TRIM8/TRIM38	6
GO:0097352	BP	GO:0097352	autophagosome maturation	6/434	59/18903	0.00228150920068971	0.0404998714327838	0.0345698947450167	TOM1/VCP/MAP1LC3A/UBQLN1/MAP1LC3B/PIK3R4	6
GO:0031145	BP	GO:0031145	anaphase-promoting complex-dependent catabolic process	4/434	25/18903	0.00236469736956434	0.0406698469042852	0.0347149824687837	CDC27/ANAPC13/ANAPC5/UBE2S	4
GO:0033233	BP	GO:0033233	regulation of protein sumoylation	4/434	25/18903	0.00236469736956434	0.0406698469042852	0.0347149824687837	PIAS4/TOLLIP/ARNT/MUL1	4
GO:0051788	BP	GO:0051788	response to misfolded protein	4/434	25/18903	0.00236469736956434	0.0406698469042852	0.0347149824687837	VCP/BAG6/STUB1/RNF185	4
GO:0070423	BP	GO:0070423	nucleotide-binding oligomerization domain containing signaling pathway	4/434	25/18903	0.00236469736956434	0.0406698469042852	0.0347149824687837	XIAP/CYLD/TNFAIP3/BIRC3	4
GO:0032509	BP	GO:0032509	endosome transport via multivesicular body sorting pathway	5/434	41/18903	0.00236538999960977	0.0406698469042852	0.0347149824687837	VCP/STAM/STAM2/UBXN6/UBAP1	5
GO:0036297	BP	GO:0036297	interstrand cross-link repair	5/434	41/18903	0.00236538999960977	0.0406698469042852	0.0347149824687837	FAAP20/VCP/FAN1/RNF8/RNF168	5
GO:0035097	CC	GO:0035097	histone methyltransferase complex	6/437	62/19869	0.00237734372597426	0.0384337235699172	0.0322192636546511	WDR5B/WDR82/RBBP5/RBBP7/EED/RNF2	6
GO:0045296	MF	GO:0045296	cadherin binding	17/434	333/18432	0.00244749707248896	0.0184981279902962	0.0149680520079017	CBL/CD2AP/FNBP1L/PACSIN2/CORO1B/UBFD1/SNX9/CDH1/EPS15/USP8/SRC/ABI1/SPTAN1/NCK1/LASP1/SH3GL1/ASAP1	17
GO:0035091	MF	GO:0035091	phosphatidylinositol binding	15/434	277/18432	0.00247480623906456	0.0184981279902962	0.0149680520079017	TOM1/TOM1L2/WDFY1/SNX9/STAM/SH3YL1/WIPI2/TOM1L1/STAM2/ING2/RNF34/SH3PXD2A/MYO1E/ASAP1/WDR45B	15
GO:0051701	BP	GO:0051701	biological process involved in interaction with host	12/434	203/18903	0.00263468563840102	0.0450641022734841	0.0384658325387166	CBL/TRIM68/TRIM27/DDB1/WWP2/EPS15/TRIM11/SRC/THOC3/TRIM22/TRIM8/TRIM38	12
GO:0030863	CC	GO:0030863	cortical cytoskeleton	8/437	108/19869	0.00266259985523042	0.0413235497531761	0.0346418254848926	SNX9/CDH1/WDR1/PDLIM2/LLGL2/SPTAN1/LASP1/MYO1E	8
GO:0046426	BP	GO:0046426	negative regulation of receptor signaling pathway via JAK-STAT	4/434	26/18903	0.00274458744932825	0.046459923626773	0.0396572782287635	VHL/SOCS2/PPP2CA/SOCS3	4
GO:0046639	BP	GO:0046639	negative regulation of alpha-beta T cell differentiation	4/434	26/18903	0.00274458744932825	0.046459923626773	0.0396572782287635	BCL6/SOCS5/RC3H1/ZC3H12A	4
GO:0004175	MF	GO:0004175	endopeptidase activity	20/434	426/18432	0.00282428910571147	0.0207585249269793	0.0167970878392314	USP9Y/USP13/RHBDD3/DDI2/USP47/USP33/USP14/USP25/SENP6/MALT1/USP38/PSEN2/USP42/USP10/USP48/USP12/USP8/USP15/USP36/USP28	20
GO:0070424	BP	GO:0070424	regulation of nucleotide-binding oligomerization domain containing signaling pathway	3/434	13/18903	0.00289579534449392	0.0485193464863165	0.0414151611298996	XIAP/TNFAIP3/BIRC3	3
GO:0070914	BP	GO:0070914	UV-damage excision repair	3/434	13/18903	0.00289579534449392	0.0485193464863165	0.0414151611298996	CUL4B/DDB1/DDB2	3
GO:0045622	BP	GO:0045622	regulation of T-helper cell differentiation	5/434	43/18903	0.0029267171072174	0.0487885227416342	0.0416449246942022	BCL6/SOCS5/MALT1/RC3H1/ZC3H12A	5
GO:2001234	BP	GO:2001234	negative regulation of apoptotic signaling pathway	13/434	233/18903	0.00294694333459093	0.0488775854080638	0.0417209468368722	SH3RF1/PCGF2/USP47/SYVN1/RFFL/BIRC6/ING2/RNF34/SRC/FXN/TNFAIP3/IVNS1ABP/MDM2	13
GO:0005819	CC	GO:0005819	spindle	19/437	426/19869	0.00298991223835721	0.0446186903262538	0.0374041652490842	LATS1/CDC27/MID1/KLHL22/ANAPC5/UBXN2B/ARHGEF7/XIAP/KLHL42/TBL1XR1/BIRC6/PPP2CA/EML4/EML3/NEDD9/LATS2/EML2/CYLD/POC1B	19
GO:0019058	BP	GO:0019058	viral life cycle	16/434	319/18903	0.0030196109741844	0.0498311680362893	0.0425349062377839	TNIP1/TRIM68/NEDD4/ISG15/VCP/TRIM27/DDB1/LRSAM1/ATG16L1/WWP2/EPS15/TRIM11/TRIM22/TRIM8/TRIM38/ZC3H12A	16
GO:0031386	MF	GO:0031386	protein tag	3/434	13/18432	0.0031098038585216	0.0217686270096512	0.0176144278703228	ISG15/NEDD8/UBC	3
GO:0032454	MF	GO:0032454	histone H3-methyl-lysine-9 demethylase activity	3/434	13/18432	0.0031098038585216	0.0217686270096512	0.0176144278703228	PHF8/PHF2/KDM7A	3
GO:0061578	MF	GO:0061578	Lys63-specific deubiquitinase activity	3/434	13/18432	0.0031098038585216	0.0217686270096512	0.0176144278703228	STAMBP/CYLD/TNFAIP3	3
GO:0070507	BP	GO:0070507	regulation of microtubule cytoskeleton organization	10/434	155/18903	0.00313776661089786	0.0514424968937538	0.0439103049003354	TRIM36/MID1/PRKAA1/SENP6/PRKAA2/ABL1/ARHGEF7/EML3/EML2/CYLD	10
GO:0034143	BP	GO:0034143	regulation of toll-like receptor 4 signaling pathway	4/434	27/18903	0.00316424615485331	0.0514424968937538	0.0439103049003354	WDFY1/LYN/PELI1/TNFAIP3	4
GO:0042059	BP	GO:0042059	negative regulation of epidermal growth factor receptor signaling pathway	4/434	27/18903	0.00316424615485331	0.0514424968937538	0.0439103049003354	CBL/SOCS4/SOCS5/CBLC	4
GO:0000153	CC	GO:0000153	cytoplasmic ubiquitin ligase complex	3/437	14/19869	0.0032107374490352	0.046139486304654	0.0386790593275585	USP33/SYVN1/ATG3	3
GO:0042326	BP	GO:0042326	negative regulation of phosphorylation	18/434	381/18903	0.00324832809809251	0.0525493077543636	0.0448550569106578	LATS1/CBL/SOCS4/IBTK/SOCS5/TRIM27/ABL1/PPP2CA/PWP1/LYN/NCK1/LATS2/CBLC/NCK2/TNFAIP3/ZC3H12A/MIDN/SOCS3	18
GO:0071383	BP	GO:0071383	cellular response to steroid hormone stimulus	12/434	209/18903	0.00333973645782443	0.0537632084681149	0.0458912187161325	LATS1/KDM5D/TRIM68/NEDD4/UBA5/RNF14/UBE2L3/PIAS2/UFL1/USP8/SRC/ZBTB7A	12
GO:0051087	MF	GO:0051087	chaperone binding	8/434	105/18432	0.00337861859110598	0.0232807937293397	0.0188380214208047	USP13/STUB1/SYVN1/DNAJB2/UBL4A/GNB5/BAG1/AMFR	8
GO:0007219	BP	GO:0007219	Notch signaling pathway	11/434	183/18903	0.00344233876911447	0.0548768957173394	0.0468418402767084	BCL6/DTX3/PSEN2/EPN1/WWP2/PRKCI/SRC/LLGL2/ZBTB7A/FBXW7/DTX2	11
GO:0044000	BP	GO:0044000	movement in host	11/434	183/18903	0.00344233876911447	0.0548768957173394	0.0468418402767084	CBL/TRIM68/TRIM27/DDB1/WWP2/EPS15/TRIM11/SRC/TRIM22/TRIM8/TRIM38	11
GO:0050681	MF	GO:0050681	nuclear androgen receptor binding	4/434	27/18432	0.00346301736663838	0.023495240902885	0.0190115447334479	KDM5D/TRIM68/RNF14/ZBTB7A	4
GO:0051091	BP	GO:0051091	positive regulation of DNA-binding transcription factor activity	14/434	266/18903	0.00351150519972122	0.0557090969849493	0.0475521909324059	UBE2V1/PLCG2/TRIM68/TRIM37/TRIM27/MALT1/PRKCI/TRIM52/RNF220/TRIM22/TRIM41/TRIM8/TRIM38/ZBTB7A	14
GO:0016578	BP	GO:0016578	histone deubiquitination	5/434	45/18903	0.00357838266214279	0.0561260537186342	0.0479080970102965	BARD1/USP22/USP15/USP36/TAF5L	5
GO:0043620	BP	GO:0043620	regulation of DNA-templated transcription in response to stress	5/434	45/18903	0.00357838266214279	0.0561260537186342	0.0479080970102965	VHL/NEDD4/ARNT/NCK1/NCK2	5
GO:0044409	BP	GO:0044409	entry into host	10/434	158/18903	0.00359911681039809	0.0561260537186342	0.0479080970102965	CBL/TRIM68/TRIM27/WWP2/EPS15/TRIM11/SRC/TRIM22/TRIM8/TRIM38	10
GO:0002467	BP	GO:0002467	germinal center formation	3/434	14/18903	0.00362324098305434	0.0561260537186342	0.0479080970102965	BCL6/RC3H1/TNFAIP3	3
GO:0033169	BP	GO:0033169	histone H3-K9 demethylation	3/434	14/18903	0.00362324098305434	0.0561260537186342	0.0479080970102965	PHF8/PHF2/KDM7A	3
GO:0033209	BP	GO:0033209	tumor necrosis factor-mediated signaling pathway	8/434	109/18903	0.00365270080589496	0.0563167579650659	0.0480708784091834	PIAS4/TRAF3/RFFL/XIAP/TRAF3IP2/CYLD/TNFAIP3/BIRC3	8
GO:0016581	CC	GO:0016581	NuRD complex	3/437	15/19869	0.00394845265140093	0.0484807921410145	0.0406417926521255	RBBP7/CHD3/CHD4	3
GO:0035102	CC	GO:0035102	PRC1 complex	3/437	15/19869	0.00394845265140093	0.0484807921410145	0.0406417926521255	PCGF2/CBX4/RNF2	3
GO:0048188	CC	GO:0048188	Set1C/COMPASS complex	3/437	15/19869	0.00394845265140093	0.0484807921410145	0.0406417926521255	WDR5B/WDR82/RBBP5	3
GO:0090545	CC	GO:0090545	CHD-type complex	3/437	15/19869	0.00394845265140093	0.0484807921410145	0.0406417926521255	RBBP7/CHD3/CHD4	3
GO:0004715	MF	GO:0004715	non-membrane spanning protein tyrosine kinase activity	5/434	45/18432	0.00398208169289468	0.026607545857069	0.0215299153730669	TNK2/ABL1/ABL2/SRC/LYN	5
GO:0005938	CC	GO:0005938	cell cortex	15/437	312/19869	0.00401805869506453	0.0484807921410145	0.0406417926521255	RHOBTB3/FNBP1L/NEDD4/SNX9/CDH1/PSEN2/ARHGEF7/WDR1/PDLIM2/LLGL2/SPTAN1/LASP1/MYO1E/NEDD9/PARD6B	15
GO:0050821	BP	GO:0050821	protein stabilization	12/434	214/18903	0.00403737487546428	0.0619567247244145	0.0528850432531303	VHL/USP13/TNIP2/USP33/BAG6/SYVN1/MUL1/USP36/OTUD3/MDM4/FBXW7/BAG1	12
GO:0000781	CC	GO:0000781	chromosome, telomeric region	10/437	168/19869	0.00412336634189041	0.0484807921410145	0.0406417926521255	NSMCE1/ZBTB10/DDB1/WRNIP1/WDR82/RBBP7/RNF8/THOC3/ZBTB48/CHD4	10
GO:0030970	BP	GO:0030970	retrograde protein transport, ER to cytosol	4/434	29/18903	0.00413055999791669	0.062704576552789	0.0535233948843122	UBE2J1/VCP/SYVN1/UBAC2	4
GO:1903513	BP	GO:1903513	endoplasmic reticulum to cytosol transport	4/434	29/18903	0.00413055999791669	0.062704576552789	0.0535233948843122	UBE2J1/VCP/SYVN1/UBAC2	4
GO:0009314	BP	GO:0009314	response to radiation	20/434	452/18903	0.00414339010717272	0.062704576552789	0.0535233948843122	POLK/CBL/FBXL8/CUL4B/NEDD4/PRKAA1/FBXL17/USP47/BARD1/DDB1/RBX1/ZBTB1/UBE2A/RNF8/DDB2/RNF168/GNB5/USP28/NPHP1/MDM2	20
GO:0046488	BP	GO:0046488	phosphatidylinositol metabolic process	10/434	162/18903	0.00429621663343754	0.0638524704125202	0.0545032145357207	SOCS4/PLCG2/SOCS2/INPPL1/PI4K2B/SOCS5/SH3YL1/PIK3R4/SOCS6/SOCS3	10
GO:0002831	BP	GO:0002831	regulation of response to biotic stimulus	17/434	361/18903	0.00430749867445274	0.0638524704125202	0.0545032145357207	PLCG2/ISG15/HERC5/LRSAM1/TRAF3/RNF185/XIAP/TRAF3IP2/USP15/SRC/LYN/MUL1/TRIM41/TRIM38/TNFAIP3/BIRC3/ZC3H12A	17
GO:0006110	BP	GO:0006110	regulation of glycolytic process	5/434	47/18903	0.00432807535002214	0.0638524704125202	0.0545032145357207	PRKAA1/PRKAA2/ZBTB20/ARNT/ZBTB7A	5
GO:0006984	BP	GO:0006984	ER-nucleus signaling pathway	5/434	47/18903	0.00432807535002214	0.0638524704125202	0.0545032145357207	ATG10/NCK1/NCK2/FBXW7/AMFR	5
GO:0030521	BP	GO:0030521	androgen receptor signaling pathway	5/434	47/18903	0.00432807535002214	0.0638524704125202	0.0545032145357207	KDM5D/TRIM68/RNF14/PIAS2/ZBTB7A	5
GO:0007179	BP	GO:0007179	transforming growth factor beta receptor signaling pathway	12/434	216/18903	0.00434727435602257	0.0638524704125202	0.0545032145357207	LATS1/USP9Y/TRIM33/STUB1/ING2/RBBP7/USP15/SRC/ING1/LATS2/ZBTB7A/SMURF1	12
GO:0005543	MF	GO:0005543	phospholipid binding	21/434	474/18432	0.00439126752992277	0.0289037161297902	0.0233878977634536	PACSIN2/TOM1/TOM1L2/MAP1LC3A/WDFY1/SNX9/STAM/SH3YL1/WIPI2/TOM1L1/EPN1/STAM2/PRKCI/ING2/RNF34/SH3PXD2A/MYO1E/ASAP1/WDR45B/SMURF1/ARHGAP26	21
GO:0048511	BP	GO:0048511	rhythmic process	15/434	302/18903	0.00439622529780208	0.0638524704125202	0.0545032145357207	FBXW11/KDM5B/FBXL8/PRKAA1/FBXL17/PAM/MYCBP2/DDB1/BTRC/KDM5C/PRKAA2/ATG7/SRC/KDM2A/FBXW7	15
GO:0001768	BP	GO:0001768	establishment of T cell polarity	3/434	15/18903	0.00445256264447842	0.0638524704125202	0.0545032145357207	ABL1/ABL2/TRAF3IP2	3
GO:0018410	BP	GO:0018410	C-terminal protein amino acid modification	3/434	15/18903	0.00445256264447842	0.0638524704125202	0.0545032145357207	WIPI2/ATG16L1/ATG7	3
GO:0032897	BP	GO:0032897	negative regulation of viral transcription	3/434	15/18903	0.00445256264447842	0.0638524704125202	0.0545032145357207	TRIM27/TRIM11/TRIM8	3
GO:0043328	BP	GO:0043328	protein transport to vacuole involved in ubiquitin-dependent protein catabolic process via the multivesicular body sorting pathway	3/434	15/18903	0.00445256264447842	0.0638524704125202	0.0545032145357207	STAM/STAM2/UBAP1	3
GO:0071380	BP	GO:0071380	cellular response to prostaglandin E stimulus	3/434	15/18903	0.00445256264447842	0.0638524704125202	0.0545032145357207	PRKAA1/GNB1/PRKAA2	3
GO:0050777	BP	GO:0050777	negative regulation of immune response	11/434	190/18903	0.00456818829256796	0.0652257841425791	0.0556754481606796	BCL6/ISG15/SOCS5/TRIM27/USP15/SRC/LYN/MUL1/RC3H1/TNFAIP3/ZC3H12A	11
GO:1900101	BP	GO:1900101	regulation of endoplasmic reticulum unfolded protein response	4/434	30/18903	0.00468094492209423	0.0662678981593295	0.0565649762158774	UFL1/BFAR/NCK1/NCK2	4
GO:0032527	BP	GO:0032527	protein exit from endoplasmic reticulum	5/434	48/18903	0.00474206944806408	0.0662678981593295	0.0565649762158774	UBE2J1/VCP/PREB/SYVN1/UBAC2	5
GO:0045981	BP	GO:0045981	positive regulation of nucleotide metabolic process	5/434	48/18903	0.00474206944806408	0.0662678981593295	0.0565649762158774	PRKAA1/VCP/PRKAA2/ZBTB20/ARNT	5
GO:0071985	BP	GO:0071985	multivesicular body sorting pathway	5/434	48/18903	0.00474206944806408	0.0662678981593295	0.0565649762158774	VCP/STAM/STAM2/UBXN6/UBAP1	5
GO:1900544	BP	GO:1900544	positive regulation of purine nucleotide metabolic process	5/434	48/18903	0.00474206944806408	0.0662678981593295	0.0565649762158774	PRKAA1/VCP/PRKAA2/ZBTB20/ARNT	5
GO:0019897	CC	GO:0019897	extrinsic component of plasma membrane	10/437	172/19869	0.00486280907998265	0.0554932330303902	0.0465203716939517	GNB2/TNK2/GNB1/SNX9/CDH1/USP8/SRC/LYN/GNB5/CYLD	10
GO:0009755	BP	GO:0009755	hormone-mediated signaling pathway	11/434	192/18903	0.00493845865369263	0.068667748461273	0.0586134412950734	LATS1/KDM5D/TRIM68/NEDD4/UBA5/RNF14/PIAS2/UFL1/SRC/LATS2/ZBTB7A	11
GO:2000117	BP	GO:2000117	negative regulation of cysteine-type endopeptidase activity	7/434	91/18903	0.0049556200929725	0.068667748461273	0.0586134412950734	SH3RF1/USP47/RFFL/XIAP/RNF34/SRC/BIRC3	7
GO:0090287	BP	GO:0090287	regulation of cellular response to growth factor stimulus	16/434	338/18903	0.00526168241446628	0.0725303759823509	0.0619105042762358	LATS1/NEDD4/TRIM33/MYO1C/STUB1/ABL1/XIAP/FBXL15/UBE2O/ING2/RBBP7/ARNT/ING1/LATS2/ZBTB7A/SMURF1	16
GO:1901185	BP	GO:1901185	negative regulation of ERBB signaling pathway	4/434	31/18903	0.0052785505054147	0.0725303759823509	0.0619105042762358	CBL/SOCS4/SOCS5/CBLC	4
GO:0001767	BP	GO:0001767	establishment of lymphocyte polarity	3/434	16/18903	0.00538763680053014	0.0728106965141605	0.0621497803760527	ABL1/ABL2/TRAF3IP2	3
GO:0023035	BP	GO:0023035	CD40 signaling pathway	3/434	16/18903	0.00538763680053014	0.0728106965141605	0.0621497803760527	TNIP2/TRAF3IP2/TNFAIP3	3
GO:0044790	BP	GO:0044790	suppression of viral release by host	3/434	16/18903	0.00538763680053014	0.0728106965141605	0.0621497803760527	TRIM27/TRIM11/TRIM8	3
GO:0099170	BP	GO:0099170	postsynaptic modulation of chemical synaptic transmission	3/434	16/18903	0.00538763680053014	0.0728106965141605	0.0621497803760527	CDH1/USP8/RNF19A	3
GO:1903900	BP	GO:1903900	regulation of viral life cycle	9/434	142/18903	0.00556742334964323	0.0747724265244603	0.0638242745799852	TNIP1/TRIM68/ISG15/TRIM27/DDB1/TRIM11/TRIM22/TRIM8/TRIM38	9
GO:0070301	BP	GO:0070301	cellular response to hydrogen peroxide	7/434	93/18903	0.00557943870475313	0.0747724265244603	0.0638242745799852	PRKAA1/PCGF2/MAP1LC3A/ABL1/SRC/FXN/TNFAIP3	7
GO:0000421	CC	GO:0000421	autophagosome membrane	5/437	52/19869	0.00559402163655624	0.0609405245883296	0.0510868749261906	MAP1LC3A/ATG16L1/MAP1LC3B/GABARAPL1/GABARAP	5
GO:0046632	BP	GO:0046632	alpha-beta T cell differentiation	8/434	117/18903	0.00560110137789806	0.0747724265244603	0.0638242745799852	BCL6/ZBTB16/SH3RF1/SOCS5/MALT1/ABL1/RC3H1/ZC3H12A	8
GO:0098562	CC	GO:0098562	cytoplasmic side of membrane	11/437	204/19869	0.00565427547726769	0.0609405245883296	0.0510868749261906	GNB2/TNK2/GNB1/ASPSCR1/SNX9/CDH1/TRAF3/SRC/LYN/GNB5/CYLD	11
GO:0032886	BP	GO:0032886	regulation of microtubule-based process	13/434	252/18903	0.0056863146623614	0.0756026613408698	0.0645329467115636	TRIM36/MID1/TRIM37/PRKAA1/FBXW5/SENP6/PRKAA2/ABL1/ARHGEF7/KLHL42/EML3/EML2/CYLD	13
GO:0016922	MF	GO:0016922	nuclear receptor binding	9/434	139/18432	0.00569211212342126	0.0369150212710114	0.0298703716693469	LATS1/KDM5D/TRIM68/TRIM24/RNF14/TRIP12/STRN/SRC/ZBTB7A	9
GO:0051015	MF	GO:0051015	actin filament binding	12/434	219/18432	0.0058874807929992	0.0376286815900384	0.0304478411720325	CORO1B/MYO1C/CORO2A/ABL1/ARPC1A/ABL2/WDR1/SPTAN1/ARPC1B/NEBL/LASP1/MYO1E	12
GO:1903955	BP	GO:1903955	positive regulation of protein targeting to mitochondrion	4/434	32/18903	0.00592510985864298	0.0784599224829982	0.0669718486993474	PRKAA1/UBE2L3/USP36/FBXW7	4
GO:0030177	BP	GO:0030177	positive regulation of Wnt signaling pathway	9/434	144/18903	0.00609065230111081	0.080328121111839	0.0685665063532365	VCP/USP47/ABL1/XIAP/TBL1XR1/USP8/SRC/RNF220/TNFAIP3	9
GO:0070302	BP	GO:0070302	regulation of stress-activated protein kinase signaling cascade	11/434	198/18903	0.00619359769784221	0.0813590993588552	0.0694465291341213	SH3RF1/MID1/PJA2/MAP3K3/TRAF3/RNF13/XIAP/LYN/TRAF4/CYLD/ZC3H12A	11
GO:0051213	MF	GO:0051213	dioxygenase activity	7/434	93/18432	0.00637682490051221	0.0397896836606969	0.0321964500799051	KDM5D/KDM5B/PHF8/PHF2/KDM5C/KDM2A/KDM7A	7
GO:0050863	BP	GO:0050863	regulation of T cell activation	17/434	376/18903	0.00640967397806007	0.0831589777842259	0.0709828700042931	SART1/BCL6/ZBTB16/SH3RF1/SOCS5/MALT1/ZBTB1/ABL1/ABL2/SRC/LYN/NCK1/PELI1/NCK2/RC3H1/SOCS6/ZC3H12A	17
GO:0007000	BP	GO:0007000	nucleolus organization	3/434	17/18903	0.00643190632070444	0.0831589777842259	0.0709828700042931	PHF8/PHF2/USP36	3
GO:0034497	BP	GO:0034497	protein localization to phagophore assembly site	3/434	17/18903	0.00643190632070444	0.0831589777842259	0.0709828700042931	WIPI2/ATG16L1/WDR45B	3
GO:0061709	BP	GO:0061709	reticulophagy	3/434	17/18903	0.00643190632070444	0.0831589777842259	0.0709828700042931	UBA5/UFL1/UFC1	3
GO:0003684	MF	GO:0003684	damaged DNA binding	6/434	71/18432	0.00649627488337909	0.0397896836606969	0.0321964500799051	POLK/CUL4B/RAD23B/DDB1/POLI/DDB2	6
GO:0043621	MF	GO:0043621	protein self-association	6/434	71/18432	0.00649627488337909	0.0397896836606969	0.0321964500799051	MALT1/ABL1/EML4/EML3/EML2/TNFAIP3	6
GO:0016234	CC	GO:0016234	inclusion body	6/437	76/19869	0.00654355953905667	0.0686189486798375	0.0575237524201568	TRIM37/RANBP2/UBQLN1/STUB1/EPS15/ARIH1	6
GO:1903578	BP	GO:1903578	regulation of ATP metabolic process	6/434	73/18903	0.00659599907790139	0.0849461214581497	0.0725083407407695	PRKAA1/VCP/PRKAA2/ZBTB20/ARNT/ZBTB7A	6
GO:1904893	BP	GO:1904893	negative regulation of receptor signaling pathway via STAT	4/434	33/18903	0.00662229790498347	0.084951665312366	0.0725130728658346	VHL/SOCS2/PPP2CA/SOCS3	4
GO:0048013	BP	GO:0048013	ephrin receptor signaling pathway	5/434	52/18903	0.00668095981119954	0.0853707082489467	0.0728707596855392	ARHGEF7/SRC/LYN/NCK1/NCK2	5
GO:0044772	BP	GO:0044772	mitotic cell cycle phase transition	20/434	473/18903	0.00676620974295073	0.0858535762569904	0.0732829263325743	LATS1/CDC27/JADE1/BACH1/UBE2E2/FBXL8/CUL4B/KLHL22/FBXL17/PHF8/ANAPC5/USP47/BARD1/DDB1/CUL5/FBXL15/PPP2CA/UBE2S/LATS2/MDM2	20
GO:0072331	BP	GO:0072331	signal transduction by p53 class mediator	10/434	173/18903	0.00677103418104766	0.0858535762569904	0.0732829263325743	TRIM24/PAK1IP1/BAG6/USP10/RFFL/ING2/RNF34/MDM4/USP28/MDM2	10
GO:0070064	MF	GO:0070064	proline-rich region binding	3/434	17/18432	0.00689530193552238	0.041655180185827	0.0337059460150265	NEDD4/ABL1/CYLD	3
GO:0031667	BP	GO:0031667	response to nutrient levels	20/434	474/18903	0.00691891429849621	0.0873912098317752	0.0745954201493741	CBL/MIOS/TRIM24/PRKAA1/TBL2/MAP1LC3A/VPS41/USP33/WIPI2/PRKAA2/TBL1XR1/ATG7/MAP1LC3B/SRC/RNF167/GABARAPL1/PIK3R4/GABARAP/WDR45B/ZC3H12A	20
GO:0017015	BP	GO:0017015	regulation of transforming growth factor beta receptor signaling pathway	9/434	147/18903	0.00694555021251142	0.0873915206815613	0.0745956854846457	LATS1/TRIM33/STUB1/ING2/RBBP7/ING1/LATS2/ZBTB7A/SMURF1	9
GO:0017053	CC	GO:0017053	transcription repressor complex	6/437	77/19869	0.00696829829118001	0.0711499930783644	0.059645544930045	ZBTB16/RLIM/CORO2A/TBL1XR1/MDM4/MDM2	6
GO:0008593	BP	GO:0008593	regulation of Notch signaling pathway	7/434	97/18903	0.00700115803833846	0.0877549732744408	0.0749059214788883	BCL6/WWP2/PRKCI/SRC/LLGL2/ZBTB7A/FBXW7	7
GO:0042058	BP	GO:0042058	regulation of epidermal growth factor receptor signaling pathway	6/434	74/18903	0.00704260379269402	0.0879388245445139	0.0750628533117637	CBL/SOCS4/SOCS5/WDR54/CBLC/FBXW7	6
GO:0018108	BP	GO:0018108	peptidyl-tyrosine phosphorylation	17/434	380/18903	0.00709231459241483	0.0882240951571602	0.075306354703352	CBL/SOCS4/PLCG2/TNK2/IBTK/SOCS5/ABL1/ABL2/PPP2CA/SRC/ABI1/LYN/NEDD9/CBLC/NCK2/FBXW7/SOCS3	17
GO:0006476	BP	GO:0006476	protein deacetylation	8/434	122/18903	0.00716895664324805	0.0888409570431193	0.0758328958926298	BCL6/PRKAA1/PRKAA2/TBL1XR1/ING2/RBBP7/CHD3/CHD4	8
GO:0042113	BP	GO:0042113	B cell activation	16/434	350/18903	0.00727148481188797	0.0897727673768424	0.076628270890612	PLCG2/BCL6/NSD2/TNIP2/SYVN1/MALT1/ZBTB1/ABL1/TRAF3IP2/RNF8/LYN/PELI1/RNF168/ZBTB7A/RC3H1/TNFAIP3	16
GO:0071453	BP	GO:0071453	cellular response to oxygen levels	10/434	175/18903	0.00732048647950565	0.0899953814606974	0.0768182898999414	VHL/CBL/PRKAA1/TBL2/UBQLN1/STUB1/ATG7/SRC/MDM4/MDM2	10
GO:0035520	BP	GO:0035520	monoubiquitinated protein deubiquitination	4/434	34/18903	0.00737172887117162	0.0899953814606974	0.0768182898999414	USP47/USP22/USP15/TAF5L	4
GO:1901797	BP	GO:1901797	negative regulation of signal transduction by p53 class mediator	4/434	34/18903	0.00737172887117162	0.0899953814606974	0.0768182898999414	RFFL/ING2/RNF34/MDM2	4
GO:0030159	MF	GO:0030159	signaling receptor complex adaptor activity	5/434	52/18432	0.00741038934622668	0.0441619148876482	0.0357343099341514	GNB2/GNB1/NCK1/GNB5/NCK2	5
GO:0018212	BP	GO:0018212	peptidyl-tyrosine modification	17/434	382/18903	0.00745501894425189	0.090675119307123	0.0773985007740459	CBL/SOCS4/PLCG2/TNK2/IBTK/SOCS5/ABL1/ABL2/PPP2CA/SRC/ABI1/LYN/NEDD9/CBLC/NCK2/FBXW7/SOCS3	17
GO:0006991	BP	GO:0006991	response to sterol depletion	3/434	18/18903	0.00758840283633113	0.0909731170436957	0.077652865788628	LYN/FBXW7/AMFR	3
GO:0007250	BP	GO:0007250	activation of NF-kappaB-inducing kinase activity	3/434	18/18903	0.00758840283633113	0.0909731170436957	0.077652865788628	MALT1/ZFP91/TRAF4	3
GO:0038128	BP	GO:0038128	ERBB2 signaling pathway	3/434	18/18903	0.00758840283633113	0.0909731170436957	0.077652865788628	STUB1/CUL5/SRC	3
GO:0009416	BP	GO:0009416	response to light stimulus	15/434	321/18903	0.00759032706150202	0.0909731170436957	0.077652865788628	POLK/FBXL8/CUL4B/NEDD4/PRKAA1/FBXL17/USP47/DDB1/RBX1/ZBTB1/UBE2A/DDB2/GNB5/USP28/NPHP1	15
GO:0042149	BP	GO:0042149	cellular response to glucose starvation	5/434	54/18903	0.00783300063715595	0.0935402694269823	0.0798441366382633	PRKAA1/TBL2/PRKAA2/PIK3R4/ZC3H12A	5
GO:0034045	CC	GO:0034045	phagophore assembly site membrane	3/437	19/19869	0.0078789615943823	0.0783855666312906	0.0657111776697471	WIPI2/ATG16L1/WDR45B	3
GO:1903844	BP	GO:1903844	regulation of cellular response to transforming growth factor beta stimulus	9/434	150/18903	0.00788950924883996	0.0938737259898204	0.0801287686104531	LATS1/TRIM33/STUB1/ING2/RBBP7/ING1/LATS2/ZBTB7A/SMURF1	9
GO:0033146	BP	GO:0033146	regulation of intracellular estrogen receptor signaling pathway	4/434	35/18903	0.00817495409279041	0.0965703210097975	0.0824305291522183	LATS1/UBA5/UFL1/SRC	4
GO:2000515	BP	GO:2000515	negative regulation of CD4-positive, alpha-beta T cell activation	4/434	35/18903	0.00817495409279041	0.0965703210097975	0.0824305291522183	BCL6/SOCS5/RC3H1/ZC3H12A	4
GO:0003779	MF	GO:0003779	actin binding	19/434	439/18432	0.0083233232975116	0.0489411409893682	0.0396014961102657	FBXO25/CORO1B/KLHL20/KLHL5/MYO1C/INPPL1/CORO2A/IPP/ABL1/ARPC1A/ABL2/WDR1/PDLIM2/SPTAN1/ARPC1B/NEBL/LASP1/MYO1E/ENC1	19
GO:0038093	BP	GO:0038093	Fc receptor signaling pathway	5/434	55/18903	0.00845779465885857	0.0995533966297188	0.0849768239069623	PLCG2/ABL1/SRC/LYN/MAP3K1	5
GO:0045580	BP	GO:0045580	regulation of T cell differentiation	10/434	179/18903	0.00852228312361959	0.0997048088878437	0.0851060664364151	SART1/BCL6/ZBTB16/SH3RF1/SOCS5/MALT1/ZBTB1/ABL1/RC3H1/ZC3H12A	10
GO:1902115	BP	GO:1902115	regulation of organelle assembly	11/434	207/18903	0.00853137981043973	0.0997048088878437	0.0851060664364151	TRIM37/PRKAA1/SENP6/STAM/LRSAM1/PRKAA2/ATG3/SRC/EML3/ASAP1/CYLD	11
GO:0000407	CC	GO:0000407	phagophore assembly site	4/437	37/19869	0.00859136760043563	0.0833362657242256	0.0698613839088056	WIPI2/ATG16L1/ATG7/WDR45B	4
GO:0030050	BP	GO:0030050	vesicle transport along actin filament	3/434	19/18903	0.00885976820762035	0.102448868992342	0.0874483422420052	FNBP1L/MYO1C/MYO1E	3
GO:0034244	BP	GO:0034244	negative regulation of transcription elongation by RNA polymerase II	3/434	19/18903	0.00885976820762035	0.102448868992342	0.0874483422420052	VHL/RNF8/RNF168	3
GO:0046782	BP	GO:0046782	regulation of viral transcription	3/434	19/18903	0.00885976820762035	0.102448868992342	0.0874483422420052	TRIM27/TRIM11/TRIM8	3
GO:1990756	MF	GO:1990756	ubiquitin ligase-substrate adaptor activity	4/434	35/18432	0.00891444819508354	0.0517272586056821	0.0418559271209601	VHL/FBXO42/BTRC/TRPC4AP	4
GO:0050869	BP	GO:0050869	negative regulation of B cell activation	4/434	36/18903	0.00903346011533397	0.103547165115217	0.0883858262394458	BCL6/LYN/RC3H1/TNFAIP3	4
GO:1903749	BP	GO:1903749	positive regulation of establishment of protein localization to mitochondrion	4/434	36/18903	0.00903346011533397	0.103547165115217	0.0883858262394458	PRKAA1/UBE2L3/USP36/FBXW7	4
GO:0045913	BP	GO:0045913	positive regulation of carbohydrate metabolic process	6/434	78/18903	0.00904934116567214	0.103547165115217	0.0883858262394458	PRKAA1/DDB1/PRKAA2/ZBTB20/SRC/ARNT	6
GO:0043470	BP	GO:0043470	regulation of carbohydrate catabolic process	5/434	56/18903	0.00911625580490592	0.103590948315955	0.0884231987195937	PRKAA1/PRKAA2/ZBTB20/ARNT/ZBTB7A	5
GO:0043687	BP	GO:0043687	post-translational protein modification	5/434	56/18903	0.00911625580490592	0.103590948315955	0.0884231987195937	WIPI2/ATG16L1/UBE2M/RBX1/ATG7	5
GO:0007623	BP	GO:0007623	circadian rhythm	11/434	210/18903	0.00944628722915702	0.106603461376466	0.0909946206954065	FBXW11/FBXL8/PRKAA1/FBXL17/MYCBP2/DDB1/BTRC/PRKAA2/ATG7/KDM2A/FBXW7	11
GO:0045619	BP	GO:0045619	regulation of lymphocyte differentiation	11/434	210/18903	0.00944628722915702	0.106603461376466	0.0909946206954065	SART1/BCL6/ZBTB16/SH3RF1/RNF41/SOCS5/MALT1/ZBTB1/ABL1/RC3H1/ZC3H12A	11
GO:0050811	MF	GO:0050811	GABA receptor binding	3/434	19/18432	0.00948993069848477	0.0540859894255643	0.0437645313647602	PPP2CA/GABARAPL1/GABARAP	3
GO:0000502	CC	GO:0000502	proteasome complex	5/437	59/19869	0.00951382242590879	0.0900332463720149	0.0754755103878259	VCP/RAD23B/UBQLN1/USP14/UCHL5	5
GO:0030971	MF	GO:0030971	receptor tyrosine kinase binding	6/434	77/18432	0.00956622942220865	0.0540859894255643	0.0437645313647602	CBL/RNF41/SOCS5/NCK1/CBLC/NCK2	6
GO:2000514	BP	GO:2000514	regulation of CD4-positive, alpha-beta T cell activation	6/434	79/18903	0.00960886662774286	0.108066842484615	0.0922437340651739	BCL6/SH3RF1/SOCS5/MALT1/RC3H1/ZC3H12A	6
GO:0033673	BP	GO:0033673	negative regulation of kinase activity	12/434	240/18903	0.00976768999016569	0.109478136272028	0.093448386721075	LATS1/CBL/SOCS4/IBTK/SOCS5/TRIM27/ABL1/LYN/LATS2/CBLC/TNFAIP3/MIDN	12
GO:0045324	BP	GO:0045324	late endosome to vacuole transport	4/434	37/18903	0.00994866707337819	0.111127287989707	0.0948560702341788	STAM/STAM2/UBAP1/PIK3R4	4
GO:0009895	BP	GO:0009895	negative regulation of catabolic process	15/434	332/18903	0.0101548387258354	0.112702195985732	0.0962003807647937	PRKAA1/KLHL22/TAB3/RNF41/BAG6/MYCBP2/USP14/USP25/HERC1/UCHL5/TRAF3IP2/NAF1/FUS/USP36/MDM4	15
GO:0071560	BP	GO:0071560	cellular response to transforming growth factor beta stimulus	13/434	271/18903	0.0101631751290949	0.112702195985732	0.0962003807647937	LATS1/USP9Y/TRIM33/STUB1/ABL1/ING2/RBBP7/USP15/SRC/ING1/LATS2/ZBTB7A/SMURF1	13
GO:0046332	MF	GO:0046332	SMAD binding	6/434	78/18432	0.0101635323133677	0.0567356677239894	0.0459085603495224	USP9Y/TRIM33/STUB1/USP15/ZBTB7A/SMURF1	6
GO:1901184	BP	GO:1901184	regulation of ERBB signaling pathway	6/434	80/18903	0.0101926163848241	0.112702195985732	0.0962003807647937	CBL/SOCS4/SOCS5/WDR54/CBLC/FBXW7	6
GO:0071379	BP	GO:0071379	cellular response to prostaglandin stimulus	3/434	20/18903	0.0102482751251839	0.112937367486926	0.0964011185389077	PRKAA1/GNB1/PRKAA2	3
GO:0032874	BP	GO:0032874	positive regulation of stress-activated MAPK cascade	8/434	130/18903	0.0103375518858847	0.113540201984098	0.0969156862246468	SH3RF1/MID1/PJA2/MAP3K3/TRAF3/XIAP/TRAF4/ZC3H12A	8
GO:0010803	BP	GO:0010803	regulation of tumor necrosis factor-mediated signaling pathway	5/434	58/18903	0.0105375326180339	0.114967631620011	0.0981341121238823	PIAS4/RFFL/XIAP/CYLD/TNFAIP3	5
GO:0051058	BP	GO:0051058	negative regulation of small GTPase mediated signal transduction	5/434	58/18903	0.0105375326180339	0.114967631620011	0.0981341121238823	CD2AP/BCL6/STAMBP/ABL2/KCTD10	5
GO:0032956	BP	GO:0032956	regulation of actin cytoskeleton organization	16/434	365/18903	0.0106056339699082	0.115327489924432	0.0984412801040973	LATS1/CD2AP/RHOBTB3/CORO1B/PAM/TRIM27/SNX9/ABL1/ARPC1A/ABL2/WDR1/SPTAN1/ARPC1B/NCK1/NEDD9/NCK2	16
GO:0005769	CC	GO:0005769	early endosome	17/437	414/19869	0.0106196536862702	0.0981053721493534	0.0822424308034461	TRIM3/PACSIN2/TOM1/PI4K2B/WDFY1/VPS41/TRIM27/STAMBP/STAM/PSEN2/USP10/STAM2/UBXN6/EPS15/USP8/SH3GL1/WDFY2	17
GO:0045746	BP	GO:0045746	negative regulation of Notch signaling pathway	4/434	38/18903	0.0109219273310229	0.118374948366598	0.101042530771283	BCL6/WWP2/ZBTB7A/FBXW7	4
GO:0036294	BP	GO:0036294	cellular response to decreased oxygen levels	9/434	159/18903	0.0113127011735499	0.122206942940585	0.10431344607051	VHL/CBL/PRKAA1/TBL2/UBQLN1/STUB1/SRC/MDM4/MDM2	9
GO:0006469	BP	GO:0006469	negative regulation of protein kinase activity	11/434	216/18903	0.0115015669765881	0.123839822790542	0.105707240236943	LATS1/CBL/SOCS4/IBTK/SOCS5/TRIM27/ABL1/LYN/LATS2/CBLC/TNFAIP3	11
GO:0051348	BP	GO:0051348	negative regulation of transferase activity	13/434	276/18903	0.0117080744174405	0.124575740620627	0.106335405241595	LATS1/CBL/SOCS4/IBTK/SOCS5/TRIM27/ABL1/SRC/LYN/LATS2/CBLC/TNFAIP3/MIDN	13
GO:0060252	BP	GO:0060252	positive regulation of glial cell proliferation	3/434	21/18903	0.0117558468765466	0.124575740620627	0.106335405241595	UFL1/PRKCI/LYN	3
GO:0099515	BP	GO:0099515	actin filament-based transport	3/434	21/18903	0.0117558468765466	0.124575740620627	0.106335405241595	FNBP1L/MYO1C/MYO1E	3
GO:2000319	BP	GO:2000319	regulation of T-helper 17 cell differentiation	3/434	21/18903	0.0117558468765466	0.124575740620627	0.106335405241595	MALT1/RC3H1/ZC3H12A	3
GO:0035601	BP	GO:0035601	protein deacylation	8/434	133/18903	0.0117595857467705	0.124575740620627	0.106335405241595	BCL6/PRKAA1/PRKAA2/TBL1XR1/ING2/RBBP7/CHD3/CHD4	8
GO:0140767	MF	GO:0140767	enzyme-substrate adaptor activity	4/434	38/18432	0.0118938872764117	0.0655650536112193	0.0530529971934678	VHL/FBXO42/BTRC/TRPC4AP	4
GO:0016580	CC	GO:0016580	Sin3 complex	3/437	22/19869	0.0119274955062622	0.105178824009767	0.0881721557759576	ING2/RBBP7/ING1	3
GO:0070822	CC	GO:0070822	Sin3-type complex	3/437	22/19869	0.0119274955062622	0.105178824009767	0.0881721557759576	ING2/RBBP7/ING1	3
GO:0071559	BP	GO:0071559	response to transforming growth factor beta	13/434	277/18903	0.0120377912261895	0.126988534109417	0.10839491837085	LATS1/USP9Y/TRIM33/STUB1/ABL1/ING2/RBBP7/USP15/SRC/ING1/LATS2/ZBTB7A/SMURF1	13
GO:0016197	BP	GO:0016197	endosomal transport	12/434	247/18903	0.0120695707173208	0.126988534109417	0.10839491837085	RHOBTB3/TOM1/VCP/TRIM27/SNX9/STAM/STAM2/UBXN6/EPS15/UBE2O/UBAP1/BTBD8	12
GO:0002753	BP	GO:0002753	cytoplasmic pattern recognition receptor signaling pathway	5/434	60/18903	0.0121033529769328	0.126988534109417	0.10839491837085	XIAP/USP15/CYLD/TNFAIP3/BIRC3	5
GO:0032006	BP	GO:0032006	regulation of TOR signaling	7/434	108/18903	0.012285835060972	0.128084705842006	0.109330589030471	MIOS/PRKAA1/FBXO9/KLHL22/PRKAA2/RFFL/RNF167	7
GO:0090263	BP	GO:0090263	positive regulation of canonical Wnt signaling pathway	7/434	108/18903	0.012285835060972	0.128084705842006	0.109330589030471	VCP/USP47/XIAP/TBL1XR1/USP8/SRC/RNF220	7
GO:0007034	BP	GO:0007034	vacuolar transport	9/434	162/18903	0.0126699615764629	0.13125600573219	0.112037548325156	NEDD4/VCP/VPS41/STAM/STAM2/UBXN6/UBAP1/PIK3R4/SMURF1	9
GO:0050792	BP	GO:0050792	regulation of viral process	9/434	162/18903	0.0126699615764629	0.13125600573219	0.112037548325156	TNIP1/TRIM68/ISG15/TRIM27/DDB1/TRIM11/TRIM22/TRIM8/TRIM38	9
GO:0006289	BP	GO:0006289	nucleotide-excision repair	6/434	84/18903	0.0127804404861217	0.131611459768108	0.112340956908286	POLK/USP45/RAD23B/FAN1/DDB1/DDB2	6
GO:1900180	BP	GO:1900180	regulation of protein localization to nucleus	8/434	135/18903	0.0127844262076816	0.131611459768108	0.112340956908286	LATS1/CD2AP/OTUD7B/CDH1/SRC/TRIM8/LATS2/ZC3H12A	8
GO:0043112	BP	GO:0043112	receptor metabolic process	5/434	61/18903	0.0129424195588121	0.132821580722309	0.113373892385252	NEDD4/PIK3R4/ZNRF3/RNF43/SMURF1	5
GO:1990000	BP	GO:1990000	amyloid fibril formation	4/434	40/18903	0.0130476718929238	0.13348459344661	0.11393982702363	VHL/SIAH1/FUS/MDM2	4
GO:0030099	BP	GO:0030099	myeloid cell differentiation	17/434	407/18903	0.0133795827129071	0.134826093842798	0.115084905411684	BCL6/ZBTB16/ISG15/RNF41/UBA5/OSTM1/UFL1/WDR1/SRC/ABI1/LYN/SH3PXD2A/ARNT/CNOT4/NEDD9/ZBTB7A/FBXW7	17
GO:0000729	BP	GO:0000729	DNA double-strand break processing	3/434	22/18903	0.0133840763071718	0.134826093842798	0.115084905411684	UBE2V2/WDR70/RNF138	3
GO:0002223	BP	GO:0002223	stimulatory C-type lectin receptor signaling pathway	3/434	22/18903	0.0133840763071718	0.134826093842798	0.115084905411684	PLCG2/SRC/LYN	3
GO:1990840	BP	GO:1990840	response to lectin	3/434	22/18903	0.0133840763071718	0.134826093842798	0.115084905411684	PLCG2/SRC/LYN	3
GO:1990858	BP	GO:1990858	cellular response to lectin	3/434	22/18903	0.0133840763071718	0.134826093842798	0.115084905411684	PLCG2/SRC/LYN	3
GO:0031334	BP	GO:0031334	positive regulation of protein-containing complex assembly	10/434	192/18903	0.0134926616864848	0.135305888445482	0.115494448660272	PLCG2/ISG15/VCP/STUB1/SNX9/SRC/FAF1/NCK1/ASAP1/NCK2	10
GO:0045936	BP	GO:0045936	negative regulation of phosphate metabolic process	18/434	440/18903	0.0135141082247619	0.135305888445482	0.115494448660272	LATS1/CBL/SOCS4/IBTK/SOCS5/TRIM27/ABL1/PPP2CA/PWP1/LYN/NCK1/LATS2/CBLC/NCK2/TNFAIP3/ZC3H12A/MIDN/SOCS3	18
GO:0050870	BP	GO:0050870	positive regulation of T cell activation	12/434	251/18903	0.0135600891223417	0.135353594765259	0.115535169837773	SART1/BCL6/ZBTB16/SOCS5/MALT1/ZBTB1/ABL1/ABL2/SRC/LYN/NCK1/NCK2	12
GO:0005776	CC	GO:0005776	autophagosome	7/437	115/19869	0.0136434877337481	0.116204443055333	0.0974150105916926	MAP1LC3A/UBQLN1/ATG16L1/MAP1LC3B/GABARAPL1/PIK3R4/GABARAP	7
GO:0010563	BP	GO:0010563	negative regulation of phosphorus metabolic process	18/434	441/18903	0.013801435728277	0.137317225121368	0.117211286139561	LATS1/CBL/SOCS4/IBTK/SOCS5/TRIM27/ABL1/PPP2CA/PWP1/LYN/NCK1/LATS2/CBLC/NCK2/TNFAIP3/ZC3H12A/MIDN/SOCS3	18
GO:0098732	BP	GO:0098732	macromolecule deacylation	8/434	137/18903	0.013873255800857	0.137317225121368	0.117211286139561	BCL6/PRKAA1/PRKAA2/TBL1XR1/ING2/RBBP7/CHD3/CHD4	8
GO:0071222	BP	GO:0071222	cellular response to lipopolysaccharide	11/434	222/18903	0.0138822529659849	0.137317225121368	0.117211286139561	TNIP1/PRPF8/PLCG2/TNIP2/MALT1/ABL1/SRC/LYN/TRIM41/TNFAIP3/ZC3H12A	11
GO:1903037	BP	GO:1903037	regulation of leukocyte cell-cell adhesion	16/434	377/18903	0.0140602853184223	0.138660591548645	0.118357957335099	SART1/BCL6/ZBTB16/SOCS5/MALT1/ZBTB1/ABL1/ABL2/SRC/LYN/NCK1/PELI1/NCK2/RC3H1/SOCS6/ZC3H12A	16
GO:0061695	CC	GO:0061695	transferase complex, transferring phosphorus-containing groups	13/437	295/19869	0.0140675997794469	0.116204443055333	0.0974150105916926	TAF3/SOCS4/SOCS2/PRKAA1/SOCS5/USP22/TRAF3/PRKAA2/PRKCI/PIK3R4/TAF5L/SOCS6/SOCS3	13
GO:0000922	CC	GO:0000922	spindle pole	9/437	172/19869	0.0140763114010326	0.116204443055333	0.0974150105916926	LATS1/KLHL22/UBXN2B/ARHGEF7/BIRC6/PPP2CA/NEDD9/LATS2/POC1B	9
GO:0060338	BP	GO:0060338	regulation of type I interferon-mediated signaling pathway	4/434	41/18903	0.0142025131786874	0.139643872092244	0.119197266293239	ISG15/RNF185/MUL1/TRIM41	4
GO:0055106	MF	GO:0055106	ubiquitin-protein transferase regulator activity	3/434	22/18432	0.0143177048119574	0.0779519484206571	0.0630760484893251	BTRC/UBE2L3/FBXW7	3
GO:0001221	MF	GO:0001221	transcription coregulator binding	7/434	109/18432	0.0146064764146742	0.0785543426691625	0.0635634852962074	BCL6/ZBTB16/PHF1/MTF2/EED/CHD4/ZBTB7A	7
GO:0051250	BP	GO:0051250	negative regulation of lymphocyte activation	9/434	166/18903	0.0146635768235892	0.143166380629195	0.122204010390265	BCL6/RHBDD3/SOCS5/LYN/PELI1/RC3H1/TNFAIP3/SOCS6/ZC3H12A	9
GO:0032623	BP	GO:0032623	interleukin-2 production	5/434	63/18903	0.014736586193975	0.143166380629195	0.122204010390265	PLCG2/TRIM27/MALT1/ABL1/TNFAIP3	5
GO:0032663	BP	GO:0032663	regulation of interleukin-2 production	5/434	63/18903	0.014736586193975	0.143166380629195	0.122204010390265	PLCG2/TRIM27/MALT1/ABL1/TNFAIP3	5
GO:2001244	BP	GO:2001244	positive regulation of intrinsic apoptotic signaling pathway	5/434	63/18903	0.014736586193975	0.143166380629195	0.122204010390265	PIAS4/SIAH1/NCK1/NCK2/FBXW7	5
GO:0048259	BP	GO:0048259	regulation of receptor-mediated endocytosis	7/434	112/18903	0.0147787463560589	0.143166380629195	0.122204010390265	CBL/CD2AP/PLCG2/TNK2/WDR54/ANKRD13D/AHI1	7
GO:0003283	BP	GO:0003283	atrial septum development	3/434	23/18903	0.015134244004568	0.14447923636919	0.123324638262438	NSD2/MDM4/MDM2	3
GO:0034695	BP	GO:0034695	response to prostaglandin E	3/434	23/18903	0.015134244004568	0.14447923636919	0.123324638262438	PRKAA1/GNB1/PRKAA2	3
GO:0035024	BP	GO:0035024	negative regulation of Rho protein signal transduction	3/434	23/18903	0.015134244004568	0.14447923636919	0.123324638262438	BCL6/ABL2/KCTD10	3
GO:0060444	BP	GO:0060444	branching involved in mammary gland duct morphogenesis	3/434	23/18903	0.015134244004568	0.14447923636919	0.123324638262438	KDM5B/BTRC/SRC	3
GO:1903861	BP	GO:1903861	positive regulation of dendrite extension	3/434	23/18903	0.015134244004568	0.14447923636919	0.123324638262438	NEDD4L/MUL1/SMURF1	3
GO:0001959	BP	GO:0001959	regulation of cytokine-mediated signaling pathway	9/434	167/18903	0.0151962194985916	0.144568799023776	0.123401087185177	ISG15/PIAS4/RNF185/RFFL/XIAP/MUL1/TRIM41/CYLD/TNFAIP3	9
GO:1903706	BP	GO:1903706	regulation of hemopoiesis	17/434	413/18903	0.0152421358197479	0.144568799023776	0.123401087185177	SART1/BCL6/ZBTB16/SH3RF1/ISG15/RNF41/SOCS5/MALT1/ZBTB1/ABL1/LYN/ARNT/CNOT4/NEDD9/RC3H1/FBXW7/ZC3H12A	17
GO:1902105	BP	GO:1902105	regulation of leukocyte differentiation	14/434	317/18903	0.0152756922232796	0.144568799023776	0.123401087185177	SART1/BCL6/ZBTB16/SH3RF1/RNF41/SOCS5/MALT1/ZBTB1/ABL1/LYN/NEDD9/RC3H1/FBXW7/ZC3H12A	14
GO:0006623	BP	GO:0006623	protein targeting to vacuole	4/434	42/18903	0.0154201205900618	0.14468478862218	0.123500093628074	NEDD4/VPS41/PIK3R4/SMURF1	4
GO:0034142	BP	GO:0034142	toll-like receptor 4 signaling pathway	4/434	42/18903	0.0154201205900618	0.14468478862218	0.123500093628074	WDFY1/LYN/PELI1/TNFAIP3	4
GO:0050691	BP	GO:0050691	regulation of defense response to virus by host	4/434	42/18903	0.0154201205900618	0.14468478862218	0.123500093628074	TRAF3IP2/MUL1/TNFAIP3/ZC3H12A	4
GO:1905368	CC	GO:1905368	peptidase complex	7/437	118/19869	0.0155342987778644	0.125568915121071	0.105265314086844	VCP/RAD23B/UBQLN1/USP14/USP22/UCHL5/TAF5L	7
GO:0007159	BP	GO:0007159	leukocyte cell-cell adhesion	17/434	414/18903	0.0155712993691724	0.145687028855732	0.124355586205146	SART1/TNIP1/BCL6/ZBTB16/SOCS5/MALT1/ZBTB1/ABL1/ABL2/SRC/LYN/NCK1/PELI1/NCK2/RC3H1/SOCS6/ZC3H12A	17
GO:0002312	BP	GO:0002312	B cell activation involved in immune response	6/434	88/18903	0.0157973064816383	0.146964177013315	0.125445734786351	PLCG2/BCL6/NSD2/ABL1/RNF8/RNF168	6
GO:0043367	BP	GO:0043367	CD4-positive, alpha-beta T cell differentiation	6/434	88/18903	0.0157973064816383	0.146964177013315	0.125445734786351	BCL6/SH3RF1/SOCS5/MALT1/RC3H1/ZC3H12A	6
GO:0034708	CC	GO:0034708	methyltransferase complex	6/437	92/19869	0.0159592124844541	0.126370907019759	0.105937629596054	WDR5B/WDR82/RBBP5/RBBP7/EED/RNF2	6
GO:0006898	BP	GO:0006898	receptor-mediated endocytosis	12/434	257/18903	0.0160543563162985	0.148933633171537	0.127126823878391	CBL/CD2AP/PLCG2/FNBP1L/NEDD4/TNK2/SNX9/EPS15/WDR54/ANKRD13D/BTBD8/AHI1	12
GO:0071897	BP	GO:0071897	DNA biosynthetic process	10/434	198/18903	0.0164093975021832	0.151798482808929	0.129572203256676	POLK/JADE1/FAAP20/VCP/WRNIP1/USP10/ZBTB1/POLI/SRC/NAF1	10
GO:0001960	BP	GO:0001960	negative regulation of cytokine-mediated signaling pathway	6/434	89/18903	0.0166222367580754	0.153335464925616	0.13088414100164	ISG15/PIAS4/RFFL/XIAP/MUL1/CYLD	6
GO:0046634	BP	GO:0046634	regulation of alpha-beta T cell activation	7/434	115/18903	0.0168711094435521	0.154736553877122	0.132080083010057	BCL6/ZBTB16/SH3RF1/SOCS5/MALT1/RC3H1/ZC3H12A	7
GO:0036120	BP	GO:0036120	cellular response to platelet-derived growth factor stimulus	3/434	24/18903	0.0170073357331119	0.154736553877122	0.132080083010057	CBL/CORO1B/SRC	3
GO:0038095	BP	GO:0038095	Fc-epsilon receptor signaling pathway	3/434	24/18903	0.0170073357331119	0.154736553877122	0.132080083010057	PLCG2/LYN/MAP3K1	3
GO:0070841	BP	GO:0070841	inclusion body assembly	3/434	24/18903	0.0170073357331119	0.154736553877122	0.132080083010057	TRIM37/VCP/DNAJB2	3
GO:0090092	BP	GO:0090092	regulation of transmembrane receptor protein serine/threonine kinase signaling pathway	13/434	290/18903	0.0170097125303414	0.154736553877122	0.132080083010057	LATS1/TRIM33/STUB1/ABL1/XIAP/FBXL15/UBE2O/ING2/RBBP7/ING1/LATS2/ZBTB7A/SMURF1	13
GO:0001726	CC	GO:0001726	ruffle	9/437	178/19869	0.0172384018564767	0.133712834786348	0.112092419829033	CD2AP/PLCG2/PACSIN2/MYO1C/SNX9/SH3YL1/ABL1/ARHGEF7/SRC	9
GO:0008154	BP	GO:0008154	actin polymerization or depolymerization	10/434	200/18903	0.0174784105051051	0.158561049996589	0.135344597775792	LATS1/SNX9/ABL1/ARPC1A/WDR1/ABI1/SPTAN1/ARPC1B/NCK1/NCK2	10
GO:1904949	CC	GO:1904949	ATPase complex	6/437	94/19869	0.0175756561188241	0.133712834786348	0.112092419829033	ING3/VCP/UCHL5/RBBP7/CHD3/CHD4	6
GO:0070851	MF	GO:0070851	growth factor receptor binding	8/434	140/18432	0.0178987912189347	0.0951008063560265	0.0769523173521733	CD2AP/TNK2/RNF41/SOCS5/TOLLIP/SRC/LYN/CBLC	8
GO:0071216	BP	GO:0071216	cellular response to biotic stimulus	12/434	261/18903	0.0179002937392458	0.160863988226757	0.137310340614095	TNIP1/PRPF8/PLCG2/TNIP2/MALT1/ABL1/ATG10/SRC/LYN/TRIM41/TNFAIP3/ZC3H12A	12
GO:0032271	BP	GO:0032271	regulation of protein polymerization	10/434	201/18903	0.0180318010899895	0.160863988226757	0.137310340614095	LATS1/SNX9/ABL1/ARHGEF7/ARPC1A/SPTAN1/ARPC1B/NCK1/EML2/NCK2	10
GO:0016032	BP	GO:0016032	viral process	17/434	421/18903	0.0180330316699957	0.160863988226757	0.137310340614095	TNIP1/TRIM68/NEDD4/ISG15/VCP/TRIM27/DDB1/LRSAM1/ATG16L1/WWP2/EPS15/EIF3F/TRIM11/TRIM22/TRIM8/TRIM38/ZC3H12A	17
GO:0031965	CC	GO:0031965	nuclear membrane	13/437	305/19869	0.0180333149017078	0.134556272728127	0.112799479850763	AHCTF1/TAF3/RANBP2/PHF8/MINDY3/TRIM27/RNF13/PSEN2/DNAJB2/ZBTB1/ABL1/WDR3/DTX2	13
GO:0035329	BP	GO:0035329	hippo signaling	4/434	44/18903	0.0180475672161565	0.160863988226757	0.137310340614095	LATS1/PJA2/SRC/LATS2	4
GO:0072538	BP	GO:0072538	T-helper 17 type immune response	4/434	44/18903	0.0180475672161565	0.160863988226757	0.137310340614095	MALT1/TRAF3IP2/RC3H1/ZC3H12A	4
GO:1903214	BP	GO:1903214	regulation of protein targeting to mitochondrion	4/434	44/18903	0.0180475672161565	0.160863988226757	0.137310340614095	PRKAA1/UBE2L3/USP36/FBXW7	4
GO:0007259	BP	GO:0007259	receptor signaling pathway via JAK-STAT	9/434	172/18903	0.0180751558025802	0.160863988226757	0.137310340614095	VHL/SOCS2/SOCS5/STAMBP/PPP2CA/PWP1/LYN/SOCS6/SOCS3	9
GO:0007178	BP	GO:0007178	transmembrane receptor protein serine/threonine kinase signaling pathway	16/434	390/18903	0.0187325919738979	0.166264410925083	0.141920035352745	LATS1/USP9Y/TRIM33/STUB1/ABL1/XIAP/FBXL15/UBE2O/ING2/RBBP7/USP15/SRC/ING1/LATS2/ZBTB7A/SMURF1	16
GO:0042659	BP	GO:0042659	regulation of cell fate specification	3/434	25/18903	0.0190040591463229	0.168219218966373	0.143588621099895	RBBP7/CHD3/CHD4	3
GO:0007088	BP	GO:0007088	regulation of mitotic nuclear division	7/434	118/18903	0.0191645795744361	0.168841281302979	0.144119601291696	CDC27/CUL7/KLHL22/TOM1L2/FBXW5/ANAPC5/TOM1L1	7
GO:1903828	BP	GO:1903828	negative regulation of protein localization	10/434	203/18903	0.0191771613660205	0.168841281302979	0.144119601291696	LATS1/NEDD4L/UBE2J1/UBXN2B/BARD1/OTUD7B/WWP2/LATS2/UBAC2/MIDN	10
GO:0097581	BP	GO:0097581	lamellipodium organization	6/434	92/18903	0.0192741318484211	0.169241307460467	0.1444610557623	CORO1B/ARHGEF7/SRC/ABI1/NCK1/NCK2	6
GO:0099091	CC	GO:0099091	postsynaptic specialization, intracellular component	2/437	10/19869	0.0193236824127099	0.141463939172292	0.118590225730434	SRC/LYN	2
GO:0046636	BP	GO:0046636	negative regulation of alpha-beta T cell activation	4/434	45/18903	0.0194591949775237	0.169506621501825	0.144687522616629	BCL6/SOCS5/RC3H1/ZC3H12A	4
GO:0062208	BP	GO:0062208	positive regulation of pattern recognition receptor signaling pathway	4/434	45/18903	0.0194591949775237	0.169506621501825	0.144687522616629	WDFY1/PJA2/USP15/PELI1	4
GO:1900744	BP	GO:1900744	regulation of p38MAPK cascade	4/434	45/18903	0.0194591949775237	0.169506621501825	0.144687522616629	PJA2/MAP3K3/CYLD/ZC3H12A	4
GO:0071219	BP	GO:0071219	cellular response to molecule of bacterial origin	11/434	234/18903	0.0197388381810921	0.171316176680647	0.146232123373474	TNIP1/PRPF8/PLCG2/TNIP2/MALT1/ABL1/SRC/LYN/TRIM41/TNFAIP3/ZC3H12A	11
GO:0048872	BP	GO:0048872	homeostasis of number of cells	13/434	296/18903	0.0197712639957263	0.171316176680647	0.146232123373474	BCL6/ISG15/UBAP2L/UBA5/ABL1/XIAP/UFL1/TRAF3IP2/LYN/ARNT/ZBTB7A/RC3H1/TNFAIP3	13
GO:0042093	BP	GO:0042093	T-helper cell differentiation	5/434	68/18903	0.019930926219682	0.172245162382725	0.147025087321366	BCL6/SOCS5/MALT1/RC3H1/ZC3H12A	5
GO:0006913	BP	GO:0006913	nucleocytoplasmic transport	14/434	329/18903	0.0203536733763801	0.174002793028283	0.148525366316532	AHCTF1/NEDD4/RANBP2/BARD1/CDH1/MALT1/NUP43/TRAF3IP2/FAM53C/THOC3/NUP37/ING1/SMURF1/ZC3H12A	14
GO:0051169	BP	GO:0051169	nuclear transport	14/434	329/18903	0.0203536733763801	0.174002793028283	0.148525366316532	AHCTF1/NEDD4/RANBP2/BARD1/CDH1/MALT1/NUP43/TRAF3IP2/FAM53C/THOC3/NUP37/ING1/SMURF1/ZC3H12A	14
GO:0043281	BP	GO:0043281	regulation of cysteine-type endopeptidase activity involved in apoptotic process	10/434	205/18903	0.0203750300195069	0.174002793028283	0.148525366316532	SH3RF1/VCP/USP47/MALT1/RFFL/XIAP/RNF34/SRC/MUL1/BIRC3	10
GO:0010998	BP	GO:0010998	regulation of translational initiation by eIF2 alpha phosphorylation	2/434	10/18903	0.0209489963986787	0.174002793028283	0.148525366316532	NCK1/NCK2	2
GO:0033131	BP	GO:0033131	regulation of glucokinase activity	2/434	10/18903	0.0209489963986787	0.174002793028283	0.148525366316532	RANBP2/MIDN	2
GO:0061085	BP	GO:0061085	regulation of histone H3-K27 methylation	2/434	10/18903	0.0209489963986787	0.174002793028283	0.148525366316532	PHF1/MTF2	2
GO:0070862	BP	GO:0070862	negative regulation of protein exit from endoplasmic reticulum	2/434	10/18903	0.0209489963986787	0.174002793028283	0.148525366316532	UBE2J1/UBAC2	2
GO:1902237	BP	GO:1902237	positive regulation of endoplasmic reticulum stress-induced intrinsic apoptotic signaling pathway	2/434	10/18903	0.0209489963986787	0.174002793028283	0.148525366316532	NCK1/NCK2	2
GO:1904526	BP	GO:1904526	regulation of microtubule binding	2/434	10/18903	0.0209489963986787	0.174002793028283	0.148525366316532	ABL1/PPP2CA	2
GO:1990700	BP	GO:1990700	nucleolar chromatin organization	2/434	10/18903	0.0209489963986787	0.174002793028283	0.148525366316532	PHF8/PHF2	2
GO:0002260	BP	GO:0002260	lymphocyte homeostasis	5/434	69/18903	0.021096384441084	0.174002793028283	0.148525366316532	ABL1/TRAF3IP2/LYN/RC3H1/TNFAIP3	5
GO:0002433	BP	GO:0002433	immune response-regulating cell surface receptor signaling pathway involved in phagocytosis	3/434	26/18903	0.0211248598024527	0.174002793028283	0.148525366316532	ABL1/SRC/LYN	3
GO:0036119	BP	GO:0036119	response to platelet-derived growth factor	3/434	26/18903	0.0211248598024527	0.174002793028283	0.148525366316532	CBL/CORO1B/SRC	3
GO:0038096	BP	GO:0038096	Fc-gamma receptor signaling pathway involved in phagocytosis	3/434	26/18903	0.0211248598024527	0.174002793028283	0.148525366316532	ABL1/SRC/LYN	3
GO:1902455	BP	GO:1902455	negative regulation of stem cell population maintenance	3/434	26/18903	0.0211248598024527	0.174002793028283	0.148525366316532	ING2/RBBP7/ING1	3
GO:1903859	BP	GO:1903859	regulation of dendrite extension	3/434	26/18903	0.0211248598024527	0.174002793028283	0.148525366316532	NEDD4L/MUL1/SMURF1	3
GO:2000050	BP	GO:2000050	regulation of non-canonical Wnt signaling pathway	3/434	26/18903	0.0211248598024527	0.174002793028283	0.148525366316532	RNF213/ABL1/ZNRF3	3
GO:2000773	BP	GO:2000773	negative regulation of cellular senescence	3/434	26/18903	0.0211248598024527	0.174002793028283	0.148525366316532	BCL6/MAP3K3/ABL1	3
GO:0060761	BP	GO:0060761	negative regulation of response to cytokine stimulus	6/434	94/18903	0.021194006458987	0.174002793028283	0.148525366316532	ISG15/PIAS4/RFFL/XIAP/MUL1/CYLD	6
GO:1900542	BP	GO:1900542	regulation of purine nucleotide metabolic process	6/434	94/18903	0.021194006458987	0.174002793028283	0.148525366316532	PRKAA1/VCP/PRKAA2/ZBTB20/ARNT/ZBTB7A	6
GO:0002285	BP	GO:0002285	lymphocyte activation involved in immune response	10/434	207/18903	0.0216266748825472	0.177112220235124	0.151179512304038	PLCG2/BCL6/NSD2/SOCS5/MALT1/ABL1/RNF8/RNF168/RC3H1/ZC3H12A	10
GO:0008641	MF	GO:0008641	ubiquitin-like modifier activating enzyme activity	2/434	10/18432	0.0219646936054593	0.113957998588324	0.092210911854498	UBA5/ATG7	2
GO:0070016	MF	GO:0070016	armadillo repeat domain binding	2/434	10/18432	0.0219646936054593	0.113957998588324	0.092210911854498	STRN/STRN4	2
GO:0002294	BP	GO:0002294	CD4-positive, alpha-beta T cell differentiation involved in immune response	5/434	70/18903	0.0223053827673339	0.182216111960011	0.155536094028306	BCL6/SOCS5/MALT1/RC3H1/ZC3H12A	5
GO:0034314	BP	GO:0034314	Arp2/3 complex-mediated actin nucleation	4/434	47/18903	0.0224821979376471	0.183204809000579	0.156380026401866	CORO1B/TRIM27/ARPC1A/ARPC1B	4
GO:0031023	BP	GO:0031023	microtubule organizing center organization	8/434	150/18903	0.0226552593138059	0.184158097986482	0.157193735155459	FBXW11/TRIM37/FBXW5/UBXN2B/USP33/CHD3/POC1B/PARD6B	8
GO:0060759	BP	GO:0060759	regulation of response to cytokine stimulus	9/434	179/18903	0.0227460815174597	0.184439831366266	0.157434217234555	ISG15/PIAS4/RNF185/RFFL/XIAP/MUL1/TRIM41/CYLD/TNFAIP3	9
GO:0036452	CC	GO:0036452	ESCRT complex	3/437	28/19869	0.0230337198778599	0.162895271089367	0.136556263609914	STAM/STAM2/UBAP1	3
GO:0005643	CC	GO:0005643	nuclear pore	6/437	100/19869	0.0230908245100906	0.162895271089367	0.136556263609914	AHCTF1/RANBP2/PARP11/MYO1C/NUP43/NUP37	6
GO:0001738	BP	GO:0001738	morphogenesis of a polarized epithelium	6/434	96/18903	0.0232392929024605	0.185085962343365	0.157985741945119	ABL1/WDR1/AHI1/ZNRF3/NPHP1/SMURF1	6
GO:0007032	BP	GO:0007032	endosome organization	6/434	96/18903	0.0232392929024605	0.185085962343365	0.157985741945119	TOM1/PI4K2B/STAM/STAM2/UBAP1/USP8	6
GO:0045088	BP	GO:0045088	regulation of innate immune response	11/434	240/18903	0.023273263415238	0.185085962343365	0.157985741945119	PLCG2/ISG15/RNF185/XIAP/USP15/SRC/LYN/MUL1/TRIM41/TNFAIP3/BIRC3	11
GO:0001783	BP	GO:0001783	B cell apoptotic process	3/434	27/18903	0.0233699365084026	0.185085962343365	0.157985741945119	BCL6/TRAF3IP2/LYN	3
GO:0032511	BP	GO:0032511	late endosome to vacuole transport via multivesicular body sorting pathway	3/434	27/18903	0.0233699365084026	0.185085962343365	0.157985741945119	STAM/STAM2/UBAP1	3
GO:0045116	BP	GO:0045116	protein neddylation	3/434	27/18903	0.0233699365084026	0.185085962343365	0.157985741945119	UBE2M/RBX1/NEDD8	3
GO:0048207	BP	GO:0048207	vesicle targeting, rough ER to cis-Golgi	3/434	27/18903	0.0233699365084026	0.185085962343365	0.157985741945119	PREB/KLHL12/TFG	3
GO:0048208	BP	GO:0048208	COPII vesicle coating	3/434	27/18903	0.0233699365084026	0.185085962343365	0.157985741945119	PREB/KLHL12/TFG	3
GO:0046718	BP	GO:0046718	viral entry into host cell	8/434	151/18903	0.023462550272763	0.185085962343365	0.157985741945119	TRIM68/TRIM27/WWP2/EPS15/TRIM11/TRIM22/TRIM8/TRIM38	8
GO:0071456	BP	GO:0071456	cellular response to hypoxia	8/434	151/18903	0.023462550272763	0.185085962343365	0.157985741945119	VHL/PRKAA1/TBL2/UBQLN1/STUB1/SRC/MDM4/MDM2	8
GO:0002287	BP	GO:0002287	alpha-beta T cell activation involved in immune response	5/434	71/18903	0.0235584446588084	0.185085962343365	0.157985741945119	BCL6/SOCS5/MALT1/RC3H1/ZC3H12A	5
GO:0002293	BP	GO:0002293	alpha-beta T cell differentiation involved in immune response	5/434	71/18903	0.0235584446588084	0.185085962343365	0.157985741945119	BCL6/SOCS5/MALT1/RC3H1/ZC3H12A	5
GO:2000036	BP	GO:2000036	regulation of stem cell population maintenance	5/434	71/18903	0.0235584446588084	0.185085962343365	0.157985741945119	ING2/RBBP7/ING1/TAF5L/WDR43	5
GO:0032386	BP	GO:0032386	regulation of intracellular transport	14/434	336/18903	0.0238520601299078	0.186945502306962	0.159573008732432	UBE2J1/NEDD4/PRKAA1/MYO1C/PREB/BARD1/CDH1/UBE2L3/SRC/USP36/RNF139/UBAC2/FBXW7/ZC3H12A	14
GO:0031057	BP	GO:0031057	negative regulation of histone modification	4/434	48/18903	0.0240949368912456	0.187951954277555	0.160432096365513	TRIP12/PHF1/OTUB1/MTF2	4
GO:0045581	BP	GO:0045581	negative regulation of T cell differentiation	4/434	48/18903	0.0240949368912456	0.187951954277555	0.160432096365513	BCL6/SOCS5/RC3H1/ZC3H12A	4
GO:0030183	BP	GO:0030183	B cell differentiation	8/434	152/18903	0.0242898533349516	0.189023408417017	0.161346668573151	PLCG2/BCL6/SYVN1/MALT1/ZBTB1/ABL1/TRAF3IP2/ZBTB7A	8
GO:0031252	CC	GO:0031252	cell leading edge	16/437	421/19869	0.024731171643605	0.171260980977781	0.143569297672638	CD2AP/PLCG2/SH3RF1/PACSIN2/CORO1B/MYO1C/INPPL1/SNX9/SH3YL1/CDH1/ABL1/ARHGEF7/PRKCI/SRC/ABI1/NEDD9	16
GO:1900076	BP	GO:1900076	regulation of cellular response to insulin stimulus	5/434	72/18903	0.0248560668049848	0.190836489833253	0.162894279256989	PRKAA1/MYO1C/SRC/NCK1/SOCS3	5
GO:0010968	BP	GO:0010968	regulation of microtubule nucleation	2/434	11/18903	0.0252201694846626	0.190836489833253	0.162894279256989	ARHGEF7/EML2	2
GO:0034770	BP	GO:0034770	histone H4-K20 methylation	2/434	11/18903	0.0252201694846626	0.190836489833253	0.162894279256989	NSD2/PWP1	2
GO:0036490	BP	GO:0036490	regulation of translation in response to endoplasmic reticulum stress	2/434	11/18903	0.0252201694846626	0.190836489833253	0.162894279256989	NCK1/NCK2	2
GO:0042276	BP	GO:0042276	error-prone translesion synthesis	2/434	11/18903	0.0252201694846626	0.190836489833253	0.162894279256989	POLK/POLI	2
GO:0045628	BP	GO:0045628	regulation of T-helper 2 cell differentiation	2/434	11/18903	0.0252201694846626	0.190836489833253	0.162894279256989	BCL6/SOCS5	2
GO:0071803	BP	GO:0071803	positive regulation of podosome assembly	2/434	11/18903	0.0252201694846626	0.190836489833253	0.162894279256989	SRC/ASAP1	2
GO:1902915	BP	GO:1902915	negative regulation of protein polyubiquitination	2/434	11/18903	0.0252201694846626	0.190836489833253	0.162894279256989	TRIP12/OTUB1	2
GO:1903299	BP	GO:1903299	regulation of hexokinase activity	2/434	11/18903	0.0252201694846626	0.190836489833253	0.162894279256989	RANBP2/MIDN	2
GO:1903897	BP	GO:1903897	regulation of PERK-mediated unfolded protein response	2/434	11/18903	0.0252201694846626	0.190836489833253	0.162894279256989	NCK1/NCK2	2
GO:1904668	BP	GO:1904668	positive regulation of ubiquitin protein ligase activity	2/434	11/18903	0.0252201694846626	0.190836489833253	0.162894279256989	BTRC/UBE2S	2
GO:2000320	BP	GO:2000320	negative regulation of T-helper 17 cell differentiation	2/434	11/18903	0.0252201694846626	0.190836489833253	0.162894279256989	RC3H1/ZC3H12A	2
GO:0031941	CC	GO:0031941	filamentous actin	3/437	29/19869	0.0252823164654656	0.171260980977781	0.143569297672638	CD2AP/MYO1C/PDLIM2	3
GO:0048545	BP	GO:0048545	response to steroid hormone	14/434	339/18903	0.0254814810457247	0.191925708434207	0.163824014860021	LATS1/KDM5D/TRIM68/NEDD4/PAM/UBA5/RNF14/UBE2L3/PIAS2/UFL1/USP8/RBBP7/SRC/ZBTB7A	14
GO:0045786	BP	GO:0045786	negative regulation of cell cycle	16/434	405/18903	0.0255094237287747	0.191925708434207	0.163824014860021	LATS1/JADE1/BCL6/TRIM37/KLHL22/TOM1L2/USP47/BARD1/TOM1L1/ABL1/RNF167/FBXO6/LATS2/USP28/TNFAIP3/MDM2	16
GO:0001673	CC	GO:0001673	male germ cell nucleus	4/437	51/19869	0.0256008682904931	0.171260980977781	0.143569297672638	TAF3/ZBTB16/TRIM24/PATZ1	4
GO:1903039	BP	GO:1903039	positive regulation of leukocyte cell-cell adhesion	12/434	275/18903	0.025628945005171	0.191925708434207	0.163824014860021	SART1/BCL6/ZBTB16/SOCS5/MALT1/ZBTB1/ABL1/ABL2/SRC/LYN/NCK1/NCK2	12
GO:0044403	BP	GO:0044403	biological process involved in symbiotic interaction	13/434	307/18903	0.0256907063259271	0.191925708434207	0.163824014860021	CBL/TRIM68/TRIM27/DDB1/WWP2/EPS15/TRIM11/SRC/THOC3/TRIM22/TRIM8/TRIM38/ZC3H12A	13
GO:0032878	BP	GO:0032878	regulation of establishment or maintenance of cell polarity	3/434	28/18903	0.0257392560161662	0.191925708434207	0.163824014860021	ABL1/ABL2/LLGL2	3
GO:0034063	BP	GO:0034063	stress granule assembly	3/434	28/18903	0.0257392560161662	0.191925708434207	0.163824014860021	PRKAA1/UBAP2L/PRKAA2	3
GO:0097696	BP	GO:0097696	receptor signaling pathway via STAT	9/434	183/18903	0.0257732148049589	0.191925708434207	0.163824014860021	VHL/SOCS2/SOCS5/STAMBP/PPP2CA/PWP1/LYN/SOCS6/SOCS3	9
GO:0032970	BP	GO:0032970	regulation of actin filament-based process	16/434	406/18903	0.0260190473139893	0.193317989545567	0.165012438669096	LATS1/CD2AP/RHOBTB3/CORO1B/PAM/TRIM27/SNX9/ABL1/ARPC1A/ABL2/WDR1/SPTAN1/ARPC1B/NCK1/NEDD9/NCK2	16
GO:0006338	BP	GO:0006338	chromatin remodeling	15/434	373/18903	0.0261333513540405	0.193728952249817	0.165363228361197	KDM5D/KDM5B/HLTF/PHF8/PHF2/SATB1/KDM5C/MPND/ZBTB1/UCHL5/RBBP7/RNF8/CHD3/CHD4/ZBTB7A	15
GO:0031996	MF	GO:0031996	thioesterase binding	2/434	11/18432	0.0264328267596737	0.133987087368001	0.108417764930785	TRAF3/TRAF4	2
GO:0070410	MF	GO:0070410	co-SMAD binding	2/434	11/18432	0.0264328267596737	0.133987087368001	0.108417764930785	USP9Y/TRIM33	2
GO:0046474	BP	GO:0046474	glycerophospholipid biosynthetic process	10/434	214/18903	0.0264487373335413	0.195049588690525	0.166490497686668	SOCS4/PLCG2/SOCS2/INPPL1/PI4K2B/SOCS5/SH3YL1/PIK3R4/SOCS6/SOCS3	10
GO:0006140	BP	GO:0006140	regulation of nucleotide metabolic process	6/434	99/18903	0.0265490761707261	0.195049588690525	0.166490497686668	PRKAA1/VCP/PRKAA2/ZBTB20/ARNT/ZBTB7A	6
GO:0030512	BP	GO:0030512	negative regulation of transforming growth factor beta receptor signaling pathway	6/434	99/18903	0.0265490761707261	0.195049588690525	0.166490497686668	STUB1/ING2/RBBP7/ING1/ZBTB7A/SMURF1	6
GO:2001237	BP	GO:2001237	negative regulation of extrinsic apoptotic signaling pathway	6/434	99/18903	0.0265490761707261	0.195049588690525	0.166490497686668	SH3RF1/RFFL/BIRC6/RNF34/SRC/TNFAIP3	6
GO:2001236	BP	GO:2001236	regulation of extrinsic apoptotic signaling pathway	8/434	155/18903	0.0268940550654348	0.197143028649304	0.168277416915538	SH3RF1/RFFL/BIRC6/RNF34/SRC/FAF1/CYLD/TNFAIP3	8
GO:0005774	CC	GO:0005774	vacuolar membrane	17/437	461/19869	0.027121356425752	0.178045171751929	0.149256533020472	MIOS/GNB2/TOM1/GNB1/MAP1LC3A/VPS41/ATG16L1/RNF13/PSEN2/OSTM1/UBXN6/MAP1LC3B/LYN/RNF167/GABARAPL1/GABARAP/ZNRF2	17
GO:0031098	BP	GO:0031098	stress-activated protein kinase signaling cascade	11/434	246/18903	0.0272494247984801	0.199303142624073	0.170121247774827	SH3RF1/MID1/PJA2/MAP3K3/TRAF3/RNF13/XIAP/LYN/TRAF4/CYLD/ZC3H12A	11
GO:1902041	BP	GO:1902041	regulation of extrinsic apoptotic signaling pathway via death domain receptors	4/434	50/18903	0.0275257764801305	0.199548882853045	0.170331006807379	RFFL/RNF34/FAF1/TNFAIP3	4
GO:1903747	BP	GO:1903747	regulation of establishment of protein localization to mitochondrion	4/434	50/18903	0.0275257764801305	0.199548882853045	0.170331006807379	PRKAA1/UBE2L3/USP36/FBXW7	4
GO:0042405	CC	GO:0042405	nuclear inclusion body	2/437	12/19869	0.0275327585183396	0.178045171751929	0.149256533020472	RANBP2/STUB1	2
GO:0001736	BP	GO:0001736	establishment of planar polarity	5/434	74/18903	0.0275868431228023	0.199548882853045	0.170331006807379	ABL1/WDR1/ZNRF3/NPHP1/SMURF1	5
GO:0002381	BP	GO:0002381	immunoglobulin production involved in immunoglobulin-mediated immune response	5/434	74/18903	0.0275868431228023	0.199548882853045	0.170331006807379	BCL6/NSD2/TRAF3IP2/RNF8/RNF168	5
GO:0007164	BP	GO:0007164	establishment of tissue polarity	5/434	74/18903	0.0275868431228023	0.199548882853045	0.170331006807379	ABL1/WDR1/ZNRF3/NPHP1/SMURF1	5
GO:0031330	BP	GO:0031330	negative regulation of cellular catabolic process	11/434	247/18903	0.0279569603700596	0.201781665615991	0.172236866316874	KLHL22/TAB3/RNF41/BAG6/USP14/HERC1/UCHL5/TRAF3IP2/NAF1/FUS/USP36	11
GO:0006109	BP	GO:0006109	regulation of carbohydrate metabolic process	9/434	186/18903	0.0282233761777031	0.201995098781308	0.172419048674474	PRKAA1/RANBP2/DDB1/PRKAA2/ZBTB20/SRC/ARNT/ZBTB7A/MIDN	9
GO:0010804	BP	GO:0010804	negative regulation of tumor necrosis factor-mediated signaling pathway	3/434	29/18903	0.028232567095195	0.201995098781308	0.172419048674474	PIAS4/RFFL/XIAP	3
GO:0034123	BP	GO:0034123	positive regulation of toll-like receptor signaling pathway	3/434	29/18903	0.028232567095195	0.201995098781308	0.172419048674474	WDFY1/PJA2/PELI1	3
GO:1900117	BP	GO:1900117	regulation of execution phase of apoptosis	3/434	29/18903	0.028232567095195	0.201995098781308	0.172419048674474	RFFL/RNF34/ZC3H12A	3
GO:0030218	BP	GO:0030218	erythrocyte differentiation	7/434	128/18903	0.0283711247898453	0.202105800021371	0.172513541078566	BCL6/ISG15/UBA5/UFL1/LYN/ARNT/ZBTB7A	7
GO:0045739	BP	GO:0045739	positive regulation of DNA repair	7/434	128/18903	0.0283711247898453	0.202105800021371	0.172513541078566	ING3/PIAS4/UBE2V2/UCHL5/RNF8/FUS/RNF168	7
GO:0022604	BP	GO:0022604	regulation of cell morphogenesis	13/434	312/18903	0.0287754520530292	0.204460778255559	0.174523704242116	NEDD4L/CUL7/RHOBTB3/CORO1B/SH3D19/ABL1/ARHGEF7/BRWD3/WDR1/SRC/MUL1/NEDD9/SMURF1	13
GO:0044843	BP	GO:0044843	cell cycle G1/S phase transition	12/434	280/18903	0.0289071669279106	0.204460778255559	0.174523704242116	LATS1/JADE1/BACH1/PLCG2/UBE2E2/CUL4B/PHF8/CUL5/PPP2CA/LATS2/FBXW7/MDM2	12
GO:2001243	BP	GO:2001243	negative regulation of intrinsic apoptotic signaling pathway	6/434	101/18903	0.0289209734749311	0.204460778255559	0.174523704242116	USP47/SYVN1/ING2/SRC/IVNS1ABP/MDM2	6
GO:0062197	BP	GO:0062197	cellular response to chemical stress	14/434	345/18903	0.0289861781154798	0.204460778255559	0.174523704242116	PRKAA1/PCGF2/MAP1LC3A/UBQLN1/RBX1/PRKAA2/ABL1/ATG7/SRC/ARNT/FBXW7/FXN/TNFAIP3/ZC3H12A	14
GO:0060337	BP	GO:0060337	type I interferon signaling pathway	5/434	75/18903	0.0290208545021866	0.204460778255559	0.174523704242116	ISG15/TRAF3/RNF185/MUL1/TRIM41	5
GO:0000910	BP	GO:0000910	cytokinesis	9/434	187/18903	0.0290752690150263	0.204460778255559	0.174523704242116	AHCTF1/TRIM36/CUL7/KLHL9/STAMBP/SNX9/BIRC6/USP8/PIK3R4	9
GO:0046580	BP	GO:0046580	negative regulation of Ras protein signal transduction	4/434	51/18903	0.0293448257437355	0.205476349130975	0.175390575593239	BCL6/STAMBP/ABL2/KCTD10	4
GO:1901799	BP	GO:1901799	negative regulation of proteasomal protein catabolic process	4/434	51/18903	0.0293448257437355	0.205476349130975	0.175390575593239	BAG6/USP14/USP25/UCHL5	4
GO:0045931	BP	GO:0045931	positive regulation of mitotic cell cycle	7/434	129/18903	0.0294313352199546	0.205643627366662	0.175533361009494	CDC27/UBE2E2/CUL4B/ANAPC5/USP22/ABL1/MDM2	7
GO:0090101	BP	GO:0090101	negative regulation of transmembrane receptor protein serine/threonine kinase signaling pathway	8/434	158/18903	0.0296861854306873	0.206104012215671	0.175926336473598	TRIM33/STUB1/ABL1/ING2/RBBP7/ING1/ZBTB7A/SMURF1	8
GO:0010992	BP	GO:0010992	ubiquitin recycling	2/434	12/18903	0.0298110249093921	0.206104012215671	0.175926336473598	UBE2S/FBXW7	2
GO:0034145	BP	GO:0034145	positive regulation of toll-like receptor 4 signaling pathway	2/434	12/18903	0.0298110249093921	0.206104012215671	0.175926336473598	WDFY1/PELI1	2
GO:0040015	BP	GO:0040015	negative regulation of multicellular organism growth	2/434	12/18903	0.0298110249093921	0.206104012215671	0.175926336473598	SOCS2/FXN	2
GO:2000317	BP	GO:2000317	negative regulation of T-helper 17 type immune response	2/434	12/18903	0.0298110249093921	0.206104012215671	0.175926336473598	RC3H1/ZC3H12A	2
GO:0008630	BP	GO:0008630	intrinsic apoptotic signaling pathway in response to DNA damage	6/434	102/18903	0.0301575204253032	0.207625360747789	0.177224929697854	USP47/BAG6/PIAS4/ABL1/ING2/USP28	6
GO:0016575	BP	GO:0016575	histone deacetylation	6/434	102/18903	0.0301575204253032	0.207625360747789	0.177224929697854	BCL6/TBL1XR1/ING2/RBBP7/CHD3/CHD4	6
GO:0019079	BP	GO:0019079	viral genome replication	7/434	130/18903	0.0305179732958773	0.20792743631465	0.177482775468271	TNIP1/ISG15/VCP/DDB1/ATG16L1/TRIM38/ZC3H12A	7
GO:0031929	BP	GO:0031929	TOR signaling	7/434	130/18903	0.0305179732958773	0.20792743631465	0.177482775468271	MIOS/PRKAA1/FBXO9/KLHL22/PRKAA2/RFFL/RNF167	7
GO:0034968	BP	GO:0034968	histone lysine methylation	7/434	130/18903	0.0305179732958773	0.20792743631465	0.177482775468271	WDR5B/NSD2/WDR82/RBBP5/PHF1/PWP1/MTF2	7
GO:0042542	BP	GO:0042542	response to hydrogen peroxide	7/434	130/18903	0.0305179732958773	0.20792743631465	0.177482775468271	PRKAA1/PCGF2/MAP1LC3A/ABL1/SRC/FXN/TNFAIP3	7
GO:0051028	BP	GO:0051028	mRNA transport	7/434	130/18903	0.0305179732958773	0.20792743631465	0.177482775468271	AHCTF1/RANBP2/PARP11/MYO1C/NUP43/THOC3/NUP37	7
GO:0008064	BP	GO:0008064	regulation of actin polymerization or depolymerization	8/434	159/18903	0.0306596150602045	0.208459991423834	0.177937354048871	LATS1/SNX9/ARPC1A/WDR1/SPTAN1/ARPC1B/NCK1/NCK2	8
GO:0031312	CC	GO:0031312	extrinsic component of organelle membrane	4/437	54/19869	0.0307931663924018	0.191617721317702	0.160634497794818	STXBP5/USP8/UBC/ZC3H12A	4
GO:0072539	BP	GO:0072539	T-helper 17 cell differentiation	3/434	30/18903	0.0308494140033173	0.209317098320029	0.178668963659926	MALT1/RC3H1/ZC3H12A	3
GO:0032007	BP	GO:0032007	negative regulation of TOR signaling	4/434	52/18903	0.0312334812381135	0.211486087393742	0.180520370129346	MIOS/PRKAA1/PRKAA2/RNF167	4
GO:0016241	BP	GO:0016241	regulation of macroautophagy	8/434	160/18903	0.0316547314443267	0.213722961239006	0.182429721706351	NEDD4/TOM1/RNF41/UBQLN1/LRSAM1/PRKAA2/PIK3R4/USP36	8
GO:0010951	BP	GO:0010951	negative regulation of endopeptidase activity	11/434	252/18903	0.0316939957744811	0.213722961239006	0.182429721706351	SH3RF1/USP47/USP14/UCHL5/RFFL/XIAP/BIRC6/UBE2O/RNF34/SRC/BIRC3	11
GO:0019207	MF	GO:0019207	kinase regulator activity	11/434	246/18432	0.0318744921701929	0.159734670989262	0.129251828297792	SOCS4/SOCS2/IBTK/SOCS5/MALT1/TOM1L1/ABI1/FAF1/NCK1/SOCS6/SOCS3	11
GO:0071357	BP	GO:0071357	cellular response to type I interferon	5/434	77/18903	0.0320280596557242	0.215533089978275	0.183974812043127	ISG15/TRAF3/RNF185/MUL1/TRIM41	5
GO:0030126	CC	GO:0030126	COPI vesicle coat	2/437	13/19869	0.0320724819672058	0.191617721317702	0.160634497794818	COPB2/COPA	2
GO:0098992	CC	GO:0098992	neuronal dense core vesicle	2/437	13/19869	0.0320724819672058	0.191617721317702	0.160634497794818	DMXL2/STXBP5	2
GO:0106068	CC	GO:0106068	SUMO ligase complex	2/437	13/19869	0.0320724819672058	0.191617721317702	0.160634497794818	NSMCE1/RANBP2	2
GO:0034451	CC	GO:0034451	centriolar satellite	6/437	108/19869	0.03210090692178	0.191617721317702	0.160634497794818	CD2AP/MID1/KLHL12/WDR13/CHD3/LATS2	6
GO:0002204	BP	GO:0002204	somatic recombination of immunoglobulin genes involved in immune response	4/434	53/18903	0.0331920499805509	0.219381283667658	0.187259554589068	BCL6/NSD2/RNF8/RNF168	4
GO:0002208	BP	GO:0002208	somatic diversification of immunoglobulins involved in immune response	4/434	53/18903	0.0331920499805509	0.219381283667658	0.187259554589068	BCL6/NSD2/RNF8/RNF168	4
GO:0045190	BP	GO:0045190	isotype switching	4/434	53/18903	0.0331920499805509	0.219381283667658	0.187259554589068	BCL6/NSD2/RNF8/RNF168	4
GO:0034612	BP	GO:0034612	response to tumor necrosis factor	11/434	254/18903	0.0332839875388916	0.219381283667658	0.187259554589068	PRPF8/PIAS4/TRAF3/RFFL/XIAP/TRAF3IP2/NUB1/CYLD/TNFAIP3/BIRC3/ZC3H12A	11
GO:0045017	BP	GO:0045017	glycerolipid biosynthetic process	11/434	254/18903	0.0332839875388916	0.219381283667658	0.187259554589068	SOCS4/PLCG2/SOCS2/INPPL1/PI4K2B/SOCS5/SH3YL1/PIK3R4/FBXW7/SOCS6/SOCS3	11
GO:0030098	BP	GO:0030098	lymphocyte differentiation	16/434	419/18903	0.0333576666630803	0.219381283667658	0.187259554589068	SART1/PLCG2/BCL6/ZBTB16/SH3RF1/RNF41/SOCS5/SYVN1/MALT1/PATZ1/ZBTB1/ABL1/TRAF3IP2/ZBTB7A/RC3H1/ZC3H12A	16
GO:0002220	BP	GO:0002220	innate immune response activating cell surface receptor signaling pathway	3/434	31/18903	0.0335891493780926	0.219381283667658	0.187259554589068	PLCG2/SRC/LYN	3
GO:0033137	BP	GO:0033137	negative regulation of peptidyl-serine phosphorylation	3/434	31/18903	0.0335891493780926	0.219381283667658	0.187259554589068	PWP1/NCK1/NCK2	3
GO:0034694	BP	GO:0034694	response to prostaglandin	3/434	31/18903	0.0335891493780926	0.219381283667658	0.187259554589068	PRKAA1/GNB1/PRKAA2	3
GO:0036258	BP	GO:0036258	multivesicular body assembly	3/434	31/18903	0.0335891493780926	0.219381283667658	0.187259554589068	STAM/STAM2/UBAP1	3
GO:0060603	BP	GO:0060603	mammary gland duct morphogenesis	3/434	31/18903	0.0335891493780926	0.219381283667658	0.187259554589068	KDM5B/BTRC/SRC	3
GO:1900745	BP	GO:1900745	positive regulation of p38MAPK cascade	3/434	31/18903	0.0335891493780926	0.219381283667658	0.187259554589068	PJA2/MAP3K3/ZC3H12A	3
GO:1902042	BP	GO:1902042	negative regulation of extrinsic apoptotic signaling pathway via death domain receptors	3/434	31/18903	0.0335891493780926	0.219381283667658	0.187259554589068	RFFL/RNF34/TNFAIP3	3
GO:2000316	BP	GO:2000316	regulation of T-helper 17 type immune response	3/434	31/18903	0.0335891493780926	0.219381283667658	0.187259554589068	MALT1/RC3H1/ZC3H12A	3
GO:1903533	BP	GO:1903533	regulation of protein targeting	5/434	78/18903	0.03360194448381	0.219381283667658	0.187259554589068	PRKAA1/MYO1C/UBE2L3/USP36/FBXW7	5
GO:0030832	BP	GO:0030832	regulation of actin filament length	8/434	162/18903	0.0337107763345277	0.219655137862279	0.187493311150474	LATS1/SNX9/ARPC1A/WDR1/SPTAN1/ARPC1B/NCK1/NCK2	8
GO:0032479	BP	GO:0032479	regulation of type I interferon production	6/434	105/18903	0.0340731313437295	0.220702491780686	0.188387311882802	PLCG2/ISG15/TRAF3/ZBTB20/TRIM38/CYLD	6
GO:0032606	BP	GO:0032606	type I interferon production	6/434	105/18903	0.0340731313437295	0.220702491780686	0.188387311882802	PLCG2/ISG15/TRAF3/ZBTB20/TRIM38/CYLD	6
GO:1901796	BP	GO:1901796	regulation of signal transduction by p53 class mediator	6/434	105/18903	0.0340731313437295	0.220702491780686	0.188387311882802	TRIM24/PAK1IP1/RFFL/ING2/RNF34/MDM2	6
GO:0016050	BP	GO:0016050	vesicle organization	14/434	353/18903	0.034193797160669	0.221048090306372	0.188682307995983	CD2AP/FNBP1L/TOM1/PI4K2B/VPS41/PREB/KLHL12/STAM/TFG/STAM2/EPS15/PRKCI/UBAP1/USP8	14
GO:0046578	BP	GO:0046578	regulation of Ras protein signal transduction	9/434	193/18903	0.0345673537441648	0.222570168500166	0.189981524045112	CBL/BCL6/KBTBD7/STAMBP/ABL1/ABL2/KCTD10/SRC/GABARAP	9
GO:1905369	CC	GO:1905369	endopeptidase complex	5/437	82/19869	0.0345718947478069	0.203240835790138	0.170378237273881	VCP/RAD23B/UBQLN1/USP14/UCHL5	5
GO:0097191	BP	GO:0097191	extrinsic apoptotic signaling pathway	10/434	224/18903	0.0346068053023778	0.222570168500166	0.189981524045112	SH3RF1/RNF41/RFFL/BIRC6/RNF34/SRC/FAF1/GABARAP/CYLD/TNFAIP3	10
GO:0016558	BP	GO:0016558	protein import into peroxisome matrix	2/434	13/18903	0.0347047030121009	0.222570168500166	0.189981524045112	PEX10/PEX7	2
GO:0034144	BP	GO:0034144	negative regulation of toll-like receptor 4 signaling pathway	2/434	13/18903	0.0347047030121009	0.222570168500166	0.189981524045112	LYN/TNFAIP3	2
GO:0034599	BP	GO:0034599	cellular response to oxidative stress	12/434	288/18903	0.0347681170647336	0.222570168500166	0.189981524045112	PRKAA1/PCGF2/MAP1LC3A/UBQLN1/PRKAA2/ABL1/SRC/ARNT/FBXW7/FXN/TNFAIP3/ZC3H12A	12
GO:0006888	BP	GO:0006888	endoplasmic reticulum to Golgi vesicle-mediated transport	7/434	134/18903	0.0351334775269795	0.224171812253148	0.191348655692715	VCP/COPB2/COPA/PREB/KLHL12/TFG/RNF139	7
GO:0030520	BP	GO:0030520	intracellular estrogen receptor signaling pathway	4/434	54/18903	0.0352207739280225	0.224171812253148	0.191348655692715	LATS1/UBA5/UFL1/SRC	4
GO:0002292	BP	GO:0002292	T cell differentiation involved in immune response	5/434	79/18903	0.0352230983930037	0.224171812253148	0.191348655692715	BCL6/SOCS5/MALT1/RC3H1/ZC3H12A	5
GO:0033157	BP	GO:0033157	regulation of intracellular protein transport	10/434	225/18903	0.0355092639610885	0.225555943613568	0.192530123034468	UBE2J1/PRKAA1/MYO1C/BARD1/CDH1/UBE2L3/USP36/UBAC2/FBXW7/ZC3H12A	10
GO:0005164	MF	GO:0005164	tumor necrosis factor receptor binding	3/434	31/18432	0.0357967871781354	0.17737509152312	0.143525852789922	TRIM37/TRAF3/TRAF4	3
GO:0045159	MF	GO:0045159	myosin II binding	2/434	13/18432	0.0363457297521767	0.178094075785666	0.144107630245472	STXBP5/LLGL2	2
GO:0007098	BP	GO:0007098	centrosome cycle	7/434	135/18903	0.0363556912710036	0.227575871739717	0.194254294006945	TRIM37/FBXW5/UBXN2B/USP33/CHD3/POC1B/PARD6B	7
GO:2000779	BP	GO:2000779	regulation of double-strand break repair	7/434	135/18903	0.0363556912710036	0.227575871739717	0.194254294006945	ING3/NSD2/TRIP12/PIAS4/UBE2V2/OTUB1/FUS	7
GO:2001235	BP	GO:2001235	positive regulation of apoptotic signaling pathway	7/434	135/18903	0.0363556912710036	0.227575871739717	0.194254294006945	PIAS4/SIAH1/FAF1/NCK1/CYLD/NCK2/FBXW7	7
GO:0002758	BP	GO:0002758	innate immune response-activating signal transduction	3/434	32/18903	0.0364509465697598	0.227575871739717	0.194254294006945	PLCG2/SRC/LYN	3
GO:0034389	BP	GO:0034389	lipid droplet organization	3/434	32/18903	0.0364509465697598	0.227575871739717	0.194254294006945	RNF213/PRKAA1/PRKAA2	3
GO:0036257	BP	GO:0036257	multivesicular body organization	3/434	32/18903	0.0364509465697598	0.227575871739717	0.194254294006945	STAM/STAM2/UBAP1	3
GO:0043552	BP	GO:0043552	positive regulation of phosphatidylinositol 3-kinase activity	3/434	32/18903	0.0364509465697598	0.227575871739717	0.194254294006945	SRC/LYN/PIK3R4	3
GO:0060544	BP	GO:0060544	regulation of necroptotic process	3/434	32/18903	0.0364509465697598	0.227575871739717	0.194254294006945	PELI1/CYLD/BIRC3	3
GO:1902235	BP	GO:1902235	regulation of endoplasmic reticulum stress-induced intrinsic apoptotic signaling pathway	3/434	32/18903	0.0364509465697598	0.227575871739717	0.194254294006945	SYVN1/NCK1/NCK2	3
GO:0032872	BP	GO:0032872	regulation of stress-activated MAPK cascade	9/434	195/18903	0.0365467818848716	0.227741236641211	0.194395446238716	SH3RF1/MID1/PJA2/MAP3K3/TRAF3/XIAP/TRAF4/CYLD/ZC3H12A	9
GO:0030120	CC	GO:0030120	vesicle coat	4/437	57/19869	0.0365614517600227	0.209900800167665	0.17596133275043	COPB2/COPA/KLHL12/EPN1	4
GO:0031227	CC	GO:0031227	intrinsic component of endoplasmic reticulum membrane	8/437	172/19869	0.0367867381737144	0.209900800167665	0.17596133275043	TBL2/PREB/SYVN1/DNAJB2/BFAR/TECR/RNF180/AMFR	8
GO:2000772	BP	GO:2000772	regulation of cellular senescence	4/434	55/18903	0.037319831125604	0.232118040561522	0.198131400094664	BCL6/MAP3K3/ABL1/ING2	4
GO:0003714	MF	GO:0003714	transcription corepressor activity	9/434	191/18432	0.0373951085968445	0.181222449353939	0.146639003057609	KDM5B/RLIM/PIAS4/CBX4/TBL1XR1/TRIM22/TLE4/YAF2/TLE2	9
GO:0006275	BP	GO:0006275	regulation of DNA replication	7/434	136/18903	0.037605651622321	0.233453610449342	0.199271416317264	JADE1/BCL6/WRNIP1/UCHL5/PPP2CA/FAF1/RBBP6	7
GO:2001022	BP	GO:2001022	positive regulation of response to DNA damage stimulus	8/434	166/18903	0.0380911021792705	0.236003900736884	0.201448294013181	ING3/NSMCE1/PIAS4/UBE2V2/UCHL5/RNF8/FUS/RNF168	8
GO:0005834	CC	GO:0005834	heterotrimeric G-protein complex	3/437	34/19869	0.0382216076796175	0.214927301154951	0.18017508425632	GNB2/GNB1/GNB5	3
GO:1902106	BP	GO:1902106	negative regulation of leukocyte differentiation	6/434	108/18903	0.0383032967677065	0.236003900736884	0.201448294013181	BCL6/SOCS5/LYN/RC3H1/FBXW7/ZC3H12A	6
GO:0019221	BP	GO:0019221	cytokine-mediated signaling pathway	18/434	496/18903	0.0384329360975804	0.236003900736884	0.201448294013181	CBL/TNIP2/ISG15/SOCS5/PIAS4/TRAF3/TOLLIP/RNF185/RFFL/XIAP/TRAF3IP2/SRC/LYN/MUL1/TRIM41/CYLD/TNFAIP3/BIRC3	18
GO:0031369	MF	GO:0031369	translation initiation factor binding	3/434	32/18432	0.0388306093202838	0.186133681633099	0.150613004114144	TBL2/EIF3F/NCK1	3
GO:0002366	BP	GO:0002366	leukocyte activation involved in immune response	12/434	293/18903	0.0388348563974823	0.236003900736884	0.201448294013181	CBL/PLCG2/BCL6/NSD2/SOCS5/MALT1/ABL1/RNF8/LYN/RNF168/RC3H1/ZC3H12A	12
GO:0034101	BP	GO:0034101	erythrocyte homeostasis	7/434	137/18903	0.0388835498588614	0.236003900736884	0.201448294013181	BCL6/ISG15/UBA5/UFL1/LYN/ARNT/ZBTB7A	7
GO:0016571	BP	GO:0016571	histone methylation	8/434	167/18903	0.0392430459619462	0.236003900736884	0.201448294013181	WDR5B/NSD2/WDR82/RBBP5/PHF1/PWP1/MTF2/EED	8
GO:0030509	BP	GO:0030509	BMP signaling pathway	8/434	167/18903	0.0392430459619462	0.236003900736884	0.201448294013181	USP9Y/TRIM33/ABL1/XIAP/FBXL15/UBE2O/USP15/SMURF1	8
GO:0002431	BP	GO:0002431	Fc receptor mediated stimulatory signaling pathway	3/434	33/18903	0.0394338114362374	0.236003900736884	0.201448294013181	ABL1/SRC/LYN	3
GO:0038094	BP	GO:0038094	Fc-gamma receptor signaling pathway	3/434	33/18903	0.0394338114362374	0.236003900736884	0.201448294013181	ABL1/SRC/LYN	3
GO:0045736	BP	GO:0045736	negative regulation of cyclin-dependent protein serine/threonine kinase activity	3/434	33/18903	0.0394338114362374	0.236003900736884	0.201448294013181	LATS1/LATS2/TNFAIP3	3
GO:0045943	BP	GO:0045943	positive regulation of transcription by RNA polymerase I	3/434	33/18903	0.0394338114362374	0.236003900736884	0.201448294013181	PHF8/PWP1/WDR43	3
GO:1904030	BP	GO:1904030	negative regulation of cyclin-dependent protein kinase activity	3/434	33/18903	0.0394338114362374	0.236003900736884	0.201448294013181	LATS1/LATS2/TNFAIP3	3
GO:0045806	BP	GO:0045806	negative regulation of endocytosis	4/434	56/18903	0.0394893369195039	0.236003900736884	0.201448294013181	PACSIN2/LRSAM1/WDR54/ANKRD13D	4
GO:0002695	BP	GO:0002695	negative regulation of leukocyte activation	9/434	198/18903	0.0396593242028565	0.236003900736884	0.201448294013181	BCL6/RHBDD3/SOCS5/LYN/PELI1/RC3H1/TNFAIP3/SOCS6/ZC3H12A	9
GO:0002819	BP	GO:0002819	regulation of adaptive immune response	9/434	198/18903	0.0396593242028565	0.236003900736884	0.201448294013181	BCL6/NSD2/SOCS5/TRIM27/MALT1/ZBTB1/RC3H1/TNFAIP3/ZC3H12A	9
GO:0002829	BP	GO:0002829	negative regulation of type 2 immune response	2/434	14/18903	0.0398849466836086	0.236003900736884	0.201448294013181	BCL6/SOCS5	2
GO:0031115	BP	GO:0031115	negative regulation of microtubule polymerization	2/434	14/18903	0.0398849466836086	0.236003900736884	0.201448294013181	ARHGEF7/EML2	2
GO:0035791	BP	GO:0035791	platelet-derived growth factor receptor-beta signaling pathway	2/434	14/18903	0.0398849466836086	0.236003900736884	0.201448294013181	ABL1/SRC	2
GO:0043558	BP	GO:0043558	regulation of translational initiation in response to stress	2/434	14/18903	0.0398849466836086	0.236003900736884	0.201448294013181	NCK1/NCK2	2
GO:0045842	BP	GO:0045842	positive regulation of mitotic metaphase/anaphase transition	2/434	14/18903	0.0398849466836086	0.236003900736884	0.201448294013181	CDC27/ANAPC5	2
GO:0046598	BP	GO:0046598	positive regulation of viral entry into host cell	2/434	14/18903	0.0398849466836086	0.236003900736884	0.201448294013181	TRIM11/TRIM38	2
GO:0060628	BP	GO:0060628	regulation of ER to Golgi vesicle-mediated transport	2/434	14/18903	0.0398849466836086	0.236003900736884	0.201448294013181	PREB/RNF139	2
GO:0071801	BP	GO:0071801	regulation of podosome assembly	2/434	14/18903	0.0398849466836086	0.236003900736884	0.201448294013181	SRC/ASAP1	2
GO:0075294	BP	GO:0075294	positive regulation by symbiont of entry into host	2/434	14/18903	0.0398849466836086	0.236003900736884	0.201448294013181	TRIM11/TRIM38	2
GO:1903894	BP	GO:1903894	regulation of IRE1-mediated unfolded protein response	2/434	14/18903	0.0398849466836086	0.236003900736884	0.201448294013181	UFL1/BFAR	2
GO:1904152	BP	GO:1904152	regulation of retrograde protein transport, ER to cytosol	2/434	14/18903	0.0398849466836086	0.236003900736884	0.201448294013181	UBE2J1/UBAC2	2
GO:2000736	BP	GO:2000736	regulation of stem cell differentiation	5/434	82/18903	0.0403727933722596	0.238032770977559	0.203180097798975	ABL1/RBBP7/PWP1/CHD3/CHD4	5
GO:2001021	BP	GO:2001021	negative regulation of response to DNA damage stimulus	5/434	82/18903	0.0403727933722596	0.238032770977559	0.203180097798975	USP47/TRIP12/ING2/OTUB1/MDM2	5
GO:0010466	BP	GO:0010466	negative regulation of peptidase activity	11/434	263/18903	0.0411405768679304	0.242124828735275	0.206672997923597	SH3RF1/USP47/USP14/UCHL5/RFFL/XIAP/BIRC6/UBE2O/RNF34/SRC/BIRC3	11
GO:1904035	BP	GO:1904035	regulation of epithelial cell apoptotic process	6/434	110/18903	0.0413012866363089	0.242547203061298	0.207033528351894	PRKAA1/TNIP2/PIAS4/ABL1/PRKCI/TNFAIP3	6
GO:0030217	BP	GO:0030217	T cell differentiation	12/434	296/18903	0.041429695965942	0.242547203061298	0.207033528351894	SART1/BCL6/ZBTB16/SH3RF1/SOCS5/MALT1/PATZ1/ZBTB1/ABL1/TRAF3IP2/RC3H1/ZC3H12A	12
GO:0001650	CC	GO:0001650	fibrillar center	7/437	145/19869	0.0414808982798368	0.222964950447077	0.186913102789329	KDM5D/CD2AP/TRIM27/MALT1/TRAF4/WDR43/ZNRF2	7
GO:0034399	CC	GO:0034399	nuclear periphery	7/437	145/19869	0.0414808982798368	0.222964950447077	0.186913102789329	AHCTF1/HLTF/DCAF7/NARF/SATB1/PIAS4/ENC1	7
GO:0006997	BP	GO:0006997	nucleus organization	7/434	139/18903	0.0415238827941388	0.242547203061298	0.207033528351894	AHCTF1/PARP11/PHF8/PHF2/UBXN2B/USPL1/USP36	7
GO:0002262	BP	GO:0002262	myeloid cell homeostasis	8/434	169/18903	0.0416162614254685	0.242547203061298	0.207033528351894	BCL6/ISG15/UBA5/UFL1/TRAF3IP2/LYN/ARNT/ZBTB7A	8
GO:0032608	BP	GO:0032608	interferon-beta production	4/434	57/18903	0.0417293452282685	0.242547203061298	0.207033528351894	ISG15/TRAF3/ZBTB20/TRIM38	4
GO:0032648	BP	GO:0032648	regulation of interferon-beta production	4/434	57/18903	0.0417293452282685	0.242547203061298	0.207033528351894	ISG15/TRAF3/ZBTB20/TRIM38	4
GO:0038066	BP	GO:0038066	p38MAPK cascade	4/434	57/18903	0.0417293452282685	0.242547203061298	0.207033528351894	PJA2/MAP3K3/CYLD/ZC3H12A	4
GO:0016004	MF	GO:0016004	phospholipase activator activity	2/434	14/18432	0.0417551312673619	0.19289562652995	0.15608453847393	NSMAF/SRC	2
GO:0019902	MF	GO:0019902	phosphatase binding	9/434	195/18432	0.0417628447803166	0.19289562652995	0.15608453847393	CDC27/VCP/ANAPC5/DZIP3/SH3YL1/TRAF3/STRN/TRPC4AP/STRN4	9
GO:0005852	CC	GO:0005852	eukaryotic translation initiation factor 3 complex	2/437	15/19869	0.0419495911923624	0.222964950447077	0.186913102789329	EIF3I/EIF3F	2
GO:0033290	CC	GO:0033290	eukaryotic 48S preinitiation complex	2/437	15/19869	0.0419495911923624	0.222964950447077	0.186913102789329	EIF3I/EIF3F	2
GO:0005154	MF	GO:0005154	epidermal growth factor receptor binding	3/434	33/18432	0.0419908846867919	0.19289562652995	0.15608453847393	TNK2/SOCS5/CBLC	3
GO:0140658	MF	GO:0140658	ATP-dependent chromatin remodeler activity	3/434	33/18432	0.0419908846867919	0.19289562652995	0.15608453847393	HLTF/CHD3/CHD4	3
GO:0006096	BP	GO:0006096	glycolytic process	5/434	83/18903	0.0421855032325983	0.243474855212395	0.207825354006862	PRKAA1/PRKAA2/ZBTB20/ARNT/ZBTB7A	5
GO:0006900	BP	GO:0006900	vesicle budding from membrane	5/434	83/18903	0.0421855032325983	0.243474855212395	0.207825354006862	FNBP1L/PREB/KLHL12/TFG/PRKCI	5
GO:0034340	BP	GO:0034340	response to type I interferon	5/434	83/18903	0.0421855032325983	0.243474855212395	0.207825354006862	ISG15/TRAF3/RNF185/MUL1/TRIM41	5
GO:0061515	BP	GO:0061515	myeloid cell development	5/434	83/18903	0.0421855032325983	0.243474855212395	0.207825354006862	BCL6/SRC/ABI1/ZBTB7A/FBXW7	5
GO:0002263	BP	GO:0002263	cell activation involved in immune response	12/434	297/18903	0.0423209476123307	0.243787388216278	0.208092126040114	CBL/PLCG2/BCL6/NSD2/SOCS5/MALT1/ABL1/RNF8/LYN/RNF168/RC3H1/ZC3H12A	12
GO:0032743	BP	GO:0032743	positive regulation of interleukin-2 production	3/434	34/18903	0.0425365936199535	0.243787388216278	0.208092126040114	PLCG2/MALT1/ABL1	3
GO:0048199	BP	GO:0048199	vesicle targeting, to, from or within Golgi	3/434	34/18903	0.0425365936199535	0.243787388216278	0.208092126040114	PREB/KLHL12/TFG	3
GO:1900181	BP	GO:1900181	negative regulation of protein localization to nucleus	3/434	34/18903	0.0425365936199535	0.243787388216278	0.208092126040114	LATS1/OTUD7B/LATS2	3
GO:0004869	MF	GO:0004869	cysteine-type endopeptidase inhibitor activity	4/434	56/18432	0.0426649170352059	0.193971426933256	0.156955039337328	XIAP/BIRC6/UBE2O/BIRC3	4
GO:0030041	BP	GO:0030041	actin filament polymerization	8/434	170/18903	0.0428378238099452	0.244089745481694	0.208350212262886	LATS1/SNX9/ABL1/ARPC1A/SPTAN1/ARPC1B/NCK1/NCK2	8
GO:0030510	BP	GO:0030510	regulation of BMP signaling pathway	6/434	111/18903	0.0428542512746127	0.244089745481694	0.208350212262886	TRIM33/ABL1/XIAP/FBXL15/UBE2O/SMURF1	6
GO:0042177	BP	GO:0042177	negative regulation of protein catabolic process	6/434	111/18903	0.0428542512746127	0.244089745481694	0.208350212262886	BAG6/MYCBP2/USP14/USP25/UCHL5/MDM4	6
GO:0030833	BP	GO:0030833	regulation of actin filament polymerization	7/434	140/18903	0.0428866574734889	0.244089745481694	0.208350212262886	LATS1/SNX9/ARPC1A/SPTAN1/ARPC1B/NCK1/NCK2	7
GO:0001227	MF	GO:0001227	DNA-binding transcription repressor activity, RNA polymerase II-specific	13/434	323/18432	0.0431454575062419	0.194154558778089	0.157103223357852	BACH1/BCL6/ZBTB16/ZBTB37/ZBTB10/SATB1/PATZ1/ZBTB20/ZBTB1/NACC1/ZNF131/ZBTB21/ZBTB7A	13
GO:0051251	BP	GO:0051251	positive regulation of lymphocyte activation	15/434	400/18903	0.0439436340931127	0.248965540577126	0.212512095184591	SART1/BCL6/ZBTB16/NSD2/TNIP2/SOCS5/MALT1/ZBTB1/ABL1/ABL2/SRC/LYN/NCK1/PELI1/NCK2	15
GO:0045620	BP	GO:0045620	negative regulation of lymphocyte differentiation	4/434	58/18903	0.0440398498660636	0.248965540577126	0.212512095184591	BCL6/SOCS5/RC3H1/ZC3H12A	4
GO:0048008	BP	GO:0048008	platelet-derived growth factor receptor signaling pathway	4/434	58/18903	0.0440398498660636	0.248965540577126	0.212512095184591	CBL/ABL1/SRC/MYO1E	4
GO:0006757	BP	GO:0006757	ATP generation from ADP	5/434	84/18903	0.0440465831532614	0.248965540577126	0.212512095184591	PRKAA1/PRKAA2/ZBTB20/ARNT/ZBTB7A	5
GO:0016235	CC	GO:0016235	aggresome	3/437	36/19869	0.0441757245587297	0.23161852640148	0.194167457021317	TRIM37/UBQLN1/EPS15	3
GO:0070555	BP	GO:0070555	response to interleukin-1	7/434	141/18903	0.0442780498346375	0.249544783507609	0.213006525572397	TNIP2/TOLLIP/USP10/PRKCI/SRC/RC3H1/ZC3H12A	7
GO:0007163	BP	GO:0007163	establishment or maintenance of cell polarity	10/434	234/18903	0.0443770260561644	0.249544783507609	0.213006525572397	FBXW11/RHOBTB3/UBXN2B/ABL1/ABL2/PRKCI/TRAF3IP2/WDR1/LLGL2/PARD6B	10
GO:0071356	BP	GO:0071356	cellular response to tumor necrosis factor	10/434	234/18903	0.0443770260561644	0.249544783507609	0.213006525572397	PRPF8/PIAS4/TRAF3/RFFL/XIAP/TRAF3IP2/CYLD/TNFAIP3/BIRC3/ZC3H12A	10
GO:0005912	CC	GO:0005912	adherens junction	8/437	179/19869	0.0447716223714201	0.23161852640148	0.194167457021317	TNK2/CDH1/PDLIM2/LLGL2/LYN/AHI1/MYO1E/NPHP1	8
GO:0001771	BP	GO:0001771	immunological synapse formation	2/434	15/18903	0.0453360826896287	0.250645952108991	0.213946461461069	NEDD9/NCK2	2
GO:0032933	BP	GO:0032933	SREBP signaling pathway	2/434	15/18903	0.0453360826896287	0.250645952108991	0.213946461461069	FBXW7/AMFR	2
GO:0042532	BP	GO:0042532	negative regulation of tyrosine phosphorylation of STAT protein	2/434	15/18903	0.0453360826896287	0.250645952108991	0.213946461461069	PPP2CA/SOCS3	2
GO:0045064	BP	GO:0045064	T-helper 2 cell differentiation	2/434	15/18903	0.0453360826896287	0.250645952108991	0.213946461461069	BCL6/SOCS5	2
GO:0060766	BP	GO:0060766	negative regulation of androgen receptor signaling pathway	2/434	15/18903	0.0453360826896287	0.250645952108991	0.213946461461069	PIAS2/ZBTB7A	2
GO:0070262	BP	GO:0070262	peptidyl-serine dephosphorylation	2/434	15/18903	0.0453360826896287	0.250645952108991	0.213946461461069	PPP2CA/NCK1	2
GO:0097396	BP	GO:0097396	response to interleukin-17	2/434	15/18903	0.0453360826896287	0.250645952108991	0.213946461461069	TRAF3IP2/SOCS3	2
GO:0097398	BP	GO:0097398	cellular response to interleukin-17	2/434	15/18903	0.0453360826896287	0.250645952108991	0.213946461461069	TRAF3IP2/SOCS3	2
GO:1902101	BP	GO:1902101	positive regulation of metaphase/anaphase transition of cell cycle	2/434	15/18903	0.0453360826896287	0.250645952108991	0.213946461461069	CDC27/ANAPC5	2
GO:2000345	BP	GO:2000345	regulation of hepatocyte proliferation	2/434	15/18903	0.0453360826896287	0.250645952108991	0.213946461461069	FBXW7/TNFAIP3	2
GO:2000116	BP	GO:2000116	regulation of cysteine-type endopeptidase activity	10/434	235/18903	0.0454471868998225	0.250837918956331	0.214110320591291	SH3RF1/VCP/USP47/MALT1/RFFL/XIAP/RNF34/SRC/MUL1/BIRC3	10
GO:0000086	BP	GO:0000086	G2/M transition of mitotic cell cycle	7/434	142/18903	0.0456982080862548	0.250866883501423	0.214135044158052	LATS1/BACH1/FBXL8/FBXL17/USP47/BARD1/FBXL15	7
GO:0038061	BP	GO:0038061	NIK/NF-kappaB signaling	7/434	142/18903	0.0456982080862548	0.250866883501423	0.214135044158052	MALT1/ZFP91/TRAF4/CYLD/RC3H1/BIRC3/ZC3H12A	7
GO:0062098	BP	GO:0062098	regulation of programmed necrotic cell death	3/434	35/18903	0.045757997325625	0.250866883501423	0.214135044158052	PELI1/CYLD/BIRC3	3
GO:2000352	BP	GO:2000352	negative regulation of endothelial cell apoptotic process	3/434	35/18903	0.045757997325625	0.250866883501423	0.214135044158052	TNIP2/ABL1/TNFAIP3	3
GO:0000281	BP	GO:0000281	mitotic cytokinesis	5/434	85/18903	0.0459561704176242	0.251114914561527	0.21434675859906	TRIM36/CUL7/STAMBP/SNX9/USP8	5
GO:0008625	BP	GO:0008625	extrinsic apoptotic signaling pathway via death domain receptors	5/434	85/18903	0.0459561704176242	0.251114914561527	0.21434675859906	RFFL/RNF34/FAF1/GABARAP/TNFAIP3	5
GO:0002090	BP	GO:0002090	regulation of receptor internalization	4/434	59/18903	0.0464207859122682	0.252000613707164	0.215102773992621	PLCG2/WDR54/ANKRD13D/AHI1	4
GO:0045010	BP	GO:0045010	actin nucleation	4/434	59/18903	0.0464207859122682	0.252000613707164	0.215102773992621	CORO1B/TRIM27/ARPC1A/ARPC1B	4
GO:0061098	BP	GO:0061098	positive regulation of protein tyrosine kinase activity	4/434	59/18903	0.0464207859122682	0.252000613707164	0.215102773992621	SRC/ABI1/NEDD9/FBXW7	4
GO:0071214	BP	GO:0071214	cellular response to abiotic stimulus	13/434	335/18903	0.0465019402882282	0.252000613707164	0.215102773992621	POLK/CUL4B/NEDD4/USP47/BARD1/DDB1/RBX1/ZBTB1/DDB2/GNB5/MAP3K1/USP28/MDM2	13
GO:0104004	BP	GO:0104004	cellular response to environmental stimulus	13/434	335/18903	0.0465019402882282	0.252000613707164	0.215102773992621	POLK/CUL4B/NEDD4/USP47/BARD1/DDB1/RBX1/ZBTB1/DDB2/GNB5/MAP3K1/USP28/MDM2	13
GO:0030117	CC	GO:0030117	membrane coat	5/437	89/19869	0.046546625979406	0.234546634805319	0.196622111109179	COPB2/COPA/KLHL12/EPN1/EPS15	5
GO:0048475	CC	GO:0048475	coated membrane	5/437	89/19869	0.046546625979406	0.234546634805319	0.196622111109179	COPB2/COPA/KLHL12/EPN1/EPS15	5
GO:1903131	BP	GO:1903131	mononuclear cell differentiation	17/434	473/18903	0.0467231366188327	0.252782175710456	0.215769899966967	SART1/PLCG2/BCL6/ZBTB16/SH3RF1/RNF41/SOCS5/SYVN1/MALT1/PATZ1/ZBTB1/ABL1/TRAF3IP2/LYN/ZBTB7A/RC3H1/ZC3H12A	17
GO:0001217	MF	GO:0001217	DNA-binding transcription repressor activity	13/434	327/18432	0.0467733912452036	0.205125535605401	0.165980562287221	BACH1/BCL6/ZBTB16/ZBTB37/ZBTB10/SATB1/PATZ1/ZBTB20/ZBTB1/NACC1/ZNF131/ZBTB21/ZBTB7A	13
GO:0010212	BP	GO:0010212	response to ionizing radiation	7/434	143/18903	0.0471472715990692	0.254657302518656	0.217370471378672	CBL/PRKAA1/BARD1/RNF8/RNF168/USP28/MDM2	7
GO:0005545	MF	GO:0005545	1-phosphatidylinositol binding	2/434	15/18432	0.0474440014325418	0.205125535605401	0.165980562287221	WDFY1/SNX9	2
GO:0031005	MF	GO:0031005	filamin binding	2/434	15/18432	0.0474440014325418	0.205125535605401	0.165980562287221	PDLIM2/NEBL	2
GO:0071933	MF	GO:0071933	Arp2/3 complex binding	2/434	15/18432	0.0474440014325418	0.205125535605401	0.165980562287221	CORO1B/SNX9	2
GO:1903707	BP	GO:1903707	negative regulation of hemopoiesis	6/434	114/18903	0.0477310512916001	0.257387146866362	0.219700612893494	BCL6/SOCS5/LYN/RC3H1/FBXW7/ZC3H12A	6
GO:0046631	BP	GO:0046631	alpha-beta T cell activation	8/434	174/18903	0.0479602359246371	0.258199040617227	0.220393629451784	BCL6/ZBTB16/SH3RF1/SOCS5/MALT1/ABL1/RC3H1/ZC3H12A	8
GO:0070482	BP	GO:0070482	response to oxygen levels	13/434	337/18903	0.0483374777247067	0.259804053760944	0.221763637145136	VHL/CBL/PRKAA1/PAM/TBL2/UBQLN1/STUB1/PSEN2/ATG7/SRC/ARNT/MDM4/MDM2	13
GO:0070603	CC	GO:0070603	SWI/SNF superfamily-type complex	5/437	90/19869	0.0484347472770894	0.240931819788599	0.201974857066405	ING3/UCHL5/RBBP7/CHD3/CHD4	5
GO:0018022	BP	GO:0018022	peptidyl-lysine methylation	7/434	144/18903	0.0486253708463418	0.260924375587233	0.222719921850375	WDR5B/NSD2/WDR82/RBBP5/PHF1/PWP1/MTF2	7
GO:2000351	BP	GO:2000351	regulation of endothelial cell apoptotic process	4/434	60/18903	0.048872031121935	0.261318001412918	0.223055913123469	TNIP2/ABL1/PRKCI/TNFAIP3	4
GO:0048536	BP	GO:0048536	spleen development	3/434	36/18903	0.0490965916174696	0.261318001412918	0.223055913123469	ABL1/TRAF3IP2/RC3H1	3
GO:0090218	BP	GO:0090218	positive regulation of lipid kinase activity	3/434	36/18903	0.0490965916174696	0.261318001412918	0.223055913123469	SRC/LYN/PIK3R4	3
GO:0097484	BP	GO:0097484	dendrite extension	3/434	36/18903	0.0490965916174696	0.261318001412918	0.223055913123469	NEDD4L/MUL1/SMURF1	3
GO:1903146	BP	GO:1903146	regulation of autophagy of mitochondrion	3/434	36/18903	0.0490965916174696	0.261318001412918	0.223055913123469	RNF41/USP36/FBXW7	3
GO:0035710	BP	GO:0035710	CD4-positive, alpha-beta T cell activation	6/434	115/18903	0.0494297636869055	0.262665605093524	0.22420620115522	BCL6/SH3RF1/SOCS5/MALT1/RC3H1/ZC3H12A	6
GO:0072686	CC	GO:0072686	mitotic spindle	8/437	183/19869	0.0498094333793168	0.244633672799682	0.20507814675828	CDC27/KLHL22/ARHGEF7/TBL1XR1/EML4/EML3/NEDD9/EML2	8
GO:0010507	BP	GO:0010507	negative regulation of autophagy	5/434	87/18903	0.0499212798220324	0.264072160078003	0.225406808862017	KLHL22/TAB3/RNF41/HERC1/USP36	5
GO:1900182	BP	GO:1900182	positive regulation of protein localization to nucleus	5/434	87/18903	0.0499212798220324	0.264072160078003	0.225406808862017	CD2AP/CDH1/SRC/TRIM8/ZC3H12A	5
GO:0051056	BP	GO:0051056	regulation of small GTPase mediated signal transduction	12/434	305/18903	0.0499356916590864	0.264072160078003	0.225406808862017	CBL/CD2AP/BCL6/TRIO/KBTBD7/STAMBP/ABL1/ABL2/KCTD10/SRC/GABARAP/ARHGAP26	12

## Sheet: KEGG
Table S3: Gene Ontology (GO) and Kyoto Encyclopedia of Genes and Genomes (KEGG) enrichment analyses results for candidate genes
	ID	Description	GeneRatio	BgRatio	pvalue	p.adjust	qvalue	geneID	Count
hsa04120	hsa04120	Ubiquitin mediated proteolysis	50/206	142/8875	4.75715222181263e-47	8.89587465478963e-45	7.46121769526403e-45	HERC2/FBXW11/CDC27/VHL/CBL/UBE2E2/NEDD4L/MID1/UBE2J1/CUL7/TRIM37/CUL4B/UBE2E3/NEDD4/UBE2G1/ANAPC13/ANAPC5/STUB1/HERC3/SYVN1/TRIP12/KLHL9/UBE2Q2/DDB1/BTRC/PIAS4/HERC1/UBE2L3/PIAS2/UBE2M/RBX1/CUL5/WWP2/UBE2R2/UBE2A/XIAP/BIRC6/UBE2O/SIAH1/DDB2/UBE2S/UBC/CBLC/FBXO2/MAP3K1/SMURF1/FBXW7/BIRC3/MDM2/SOCS3	50
hsa04136	hsa04136	Autophagy - other	9/206	32/8875	2.90048873441159e-08	2.71195696667483e-06	2.27459379698593e-06	WIPI2/ATG16L1/ATG3/ATG10/PPP2CA/ATG7/GABARAPL1/PIK3R4/GABARAP	9
hsa04137	hsa04137	Mitophagy - animal	14/206	105/8875	1.21061442711027e-07	7.54616326232069e-06	6.32917718033089e-06	VCP/MAP1LC3A/USP8/MAP1LC3B/USP15/SRC/SIAH1/ARIH1/GABARAPL1/MUL1/GABARAP/UBC/SMURF1/AMFR	14
hsa04140	hsa04140	Autophagy - animal	17/206	169/8875	3.49108108298515e-07	1.08108398277566e-05	9.06735229009703e-06	PRKAA1/MAP1LC3A/VPS41/WIPI2/ATG16L1/PRKAA2/ATG3/BIRC6/ATG10/PPP2CA/ATG7/MAP1LC3B/GABARAPL1/PIK3R4/GABARAP/UBC/WDR45B	17
hsa04144	hsa04144	Endocytosis	21/206	252/8875	3.51301825496739e-07	1.08108398277566e-05	9.06735229009703e-06	CBL/NEDD4L/NEDD4/RNF41/STAMBP/STAM/EPN1/STAM2/EPS15/ARPC1A/PRKCI/USP8/SRC/ARPC1B/SH3GL1/ASAP1/CBLC/ASAP2/SMURF1/MDM2/PARD6B	21
hsa04141	hsa04141	Protein processing in endoplasmic reticulum	17/206	170/8875	3.80044946351759e-07	1.08108398277566e-05	9.06735229009703e-06	UBE2J1/SSR3/UBE2G1/VCP/RAD23B/UBQLN1/PREB/STUB1/SYVN1/DNAJB2/RBX1/RNF185/UBXN6/FBXO6/FBXO2/BAG1/AMFR	17
hsa03083	hsa03083	Polycomb repressive complex	12/206	83/8875	4.04683843819767e-07	1.08108398277566e-05	9.06735229009703e-06	USP45/WDR5B/PCGF2/DCAF7/CBX4/PHF1/RBBP7/MTF2/EED/KDM2A/RNF2/YAF2	12
hsa05131	hsa05131	Shigellosis	20/206	250/8875	1.29460714578167e-06	3.02614420326466e-05	2.53811137791406e-05	FBXW11/UBE2V1/TNIP1/PLCG2/FNBP1L/TAB3/MAP1LC3A/BTRC/WIPI2/ATG16L1/MALT1/UBE2V2/RBX1/ARPC1A/MAP1LC3B/SRC/ARPC1B/PIK3R4/UBC/MDM2	20
hsa04064	hsa04064	NF-kappa B signaling pathway	10/206	105/8875	0.000154416699169239	0.00320843586051641	0.00269100446505457	PLCG2/TAB3/PIAS4/TRAF3/MALT1/XIAP/LYN/CYLD/TNFAIP3/BIRC3	10
hsa04530	hsa04530	Tight junction	12/206	170/8875	0.000583600709575218	0.0109133332690566	0.009153316392285	NEDD4L/NEDD4/PRKAA1/PRKAA2/ARPC1A/PRKCI/PPP2CA/SRC/LLGL2/ARPC1B/MAP3K1/PARD6B	12
hsa04710	hsa04710	Circadian rhythm	5/206	34/8875	0.00103203940987649	0.0175446699679004	0.0147152030690524	FBXW11/PRKAA1/BTRC/RBX1/PRKAA2	5
hsa04390	hsa04390	Hippo signaling pathway	10/206	157/8875	0.00353367587864391	0.0537894953102145	0.0451147469812663	FBXW11/LATS1/BTRC/CDH1/PRKCI/PPP2CA/LLGL2/LATS2/BIRC3/PARD6B	10
hsa04012	hsa04012	ErbB signaling pathway	7/206	86/8875	0.00373937667931972	0.0537894953102145	0.0451147469812663	CBL/PLCG2/ABL1/ABL2/SRC/NCK1/NCK2	7
hsa04371	hsa04371	Apelin signaling pathway	9/206	140/8875	0.00523250687784868	0.0695008299821847	0.0582922807055757	GNB2/PRKAA1/GNB1/MAP1LC3A/CDH1/PRKAA2/MAP1LC3B/PIK3R4/GNB5	9
hsa05167	hsa05167	Kaposi sarcoma-associated herpesvirus infection	11/206	196/8875	0.00590539023567935	0.0695008299821847	0.0582922807055757	PLCG2/GNB2/GNB1/MAP1LC3A/TRAF3/ATG3/MAP1LC3B/SRC/LYN/GNB5/UBC	11
hsa04917	hsa04917	Prolactin signaling pathway	6/206	71/8875	0.0059465950786896	0.0695008299821847	0.0582922807055757	SOCS4/SOCS2/SOCS5/SRC/SOCS6/SOCS3	6
hsa04657	hsa04657	IL-17 signaling pathway	7/206	95/8875	0.00645961396490567	0.0710557536139623	0.0595964384378294	TAB3/ANAPC5/USP25/TRAF3/TRAF3IP2/TRAF4/TNFAIP3	7
hsa04666	hsa04666	Fc gamma R-mediated phagocytosis	7/206	99/8875	0.00805510256938598	0.0836835655819543	0.0701877358385094	PLCG2/INPPL1/ARPC1A/LYN/ARPC1B/ASAP1/ASAP2	7
hsa05100	hsa05100	Bacterial invasion of epithelial cells	6/206	78/8875	0.00933549430613129	0.0918809176445553	0.0770630831918871	CBL/CD2AP/CDH1/ARPC1A/SRC/ARPC1B	6
hsa05216	hsa05216	Thyroid cancer	4/206	37/8875	0.0102274718377444	0.0956268616829098	0.0802049107275742	POLK/CDH1/TFG/DDB2	4
hsa04621	hsa04621	NOD-like receptor signaling pathway	10/206	189/8875	0.0125697114948008	0.11193028807275	0.0938790482569081	TAB3/MAP1LC3A/TRAF3/ATG16L1/XIAP/MAP1LC3B/GABARAPL1/GABARAP/TNFAIP3/BIRC3	10
hsa04330	hsa04330	Notch signaling pathway	5/206	62/8875	0.0142377076827203	0.118291402743679	0.0992142921970625	DTX3/PSEN2/TLE4/TLE2/DTX2	5
hsa04910	hsa04910	Insulin signaling pathway	8/206	138/8875	0.0149142247560481	0.118291402743679	0.0992142921970625	CBL/SOCS4/SOCS2/PRKAA1/INPPL1/PRKAA2/PRKCI/SOCS3	8
hsa03420	hsa03420	Nucleotide excision repair	5/206	63/8875	0.0151817843093492	0.118291402743679	0.0992142921970625	CUL4B/RAD23B/DDB1/RBX1/DDB2	5
hsa04630	hsa04630	JAK-STAT signaling pathway	9/206	168/8875	0.0162558729792719	0.121593929884954	0.10198421363838	SOCS4/SOCS2/SOCS5/STAM/PIAS4/PIAS2/STAM2/SOCS6/SOCS3	9
hsa04727	hsa04727	GABAergic synapse	6/206	89/8875	0.0171492826633059	0.123342917616854	0.103451138333303	GNB2/GNB1/SRC/GABARAPL1/GABARAP/GNB5	6
hsa05130	hsa05130	Pathogenic Escherichia coli infection	10/206	203/8875	0.0198013696979984	0.130025625350805	0.10905611132716	MYO1C/TAB3/ABL1/ARPC1A/SRC/ABI1/ARPC1B/NCK1/MYO1E/NCK2	10
hsa04310	hsa04310	Wnt signaling pathway	9/206	174/8875	0.0199691428325154	0.130025625350805	0.10905611132716	FBXW11/BTRC/RBX1/TBL1XR1/SIAH1/ZNRF3/TLE4/RNF43/TLE2	9
hsa04668	hsa04668	TNF signaling pathway	7/206	119/8875	0.0206278174042534	0.130025625350805	0.10905611132716	TAB3/TRAF3/XIAP/CYLD/TNFAIP3/BIRC3/SOCS3	7
hsa05222	hsa05222	Small cell lung cancer	6/206	93/8875	0.0208597259921078	0.130025625350805	0.10905611132716	POLK/TRAF3/XIAP/DDB2/TRAF4/BIRC3	6
hsa05170	hsa05170	Human immunodeficiency virus 1 infection	10/206	213/8875	0.0265750722452105	0.16030769386627	0.134454525111591	FBXW11/PLCG2/CUL4B/GNB2/GNB1/DDB1/BTRC/RBX1/CUL5/GNB5	10
hsa05220	hsa05220	Chronic myeloid leukemia	5/206	77/8875	0.0329837002842071	0.192748498535836	0.161663530998252	POLK/CBL/ABL1/DDB2/MDM2	5
hsa04068	hsa04068	FoxO signaling pathway	7/206	133/8875	0.0350548348242429	0.198644064004043	0.166608305863228	BCL6/FBXO25/PRKAA1/PRKAA2/GABARAPL1/GABARAP/MDM2	7
hsa04215	hsa04215	Apoptosis - multiple species	3/206	32/8875	0.0373089287111635	0.205199107911399	0.172106203652117	XIAP/BIRC6/BIRC3	3
hsa04340	hsa04340	Hedgehog signaling pathway	4/206	56/8875	0.0405581319735894	0.213077558567763	0.178714079519261	FBXW11/SPOPL/BTRC/SMURF1	4
hsa05202	hsa05202	Transcriptional misregulation in cancer	9/206	198/8875	0.0410202786547565	0.213077558567763	0.178714079519261	POLK/BCL6/ZBTB16/NSD2/ASPSCR1/DDB2/FUS/BIRC3/MDM2	9
hsa04114	hsa04114	Oocyte meiosis	7/206	139/8875	0.0428908143727227	0.216772494262139	0.181813124937004	FBXW11/CDC27/ANAPC13/ANAPC5/BTRC/RBX1/PPP2CA	7
hsa05169	hsa05169	Epstein-Barr virus infection	9/206	204/8875	0.0480171487023608	0.23629491598267	0.198187123452957	POLK/PLCG2/NEDD4/ISG15/TRAF3/LYN/DDB2/TNFAIP3/MDM2	9
