# Supplementary material for: Summary data-based mendelian randomization and single-cell RNA sequencing analyses identify key genes associated with ubiquitination in prostate cancer
Source: Research Square preprint supplement (doi:10.21203/rs.3.rs-7723484/v1), 2025-11-22
Supplement: Supplementary file 2 [file 393d9a39f0448db549be3716.xlsx]

## Sheet: Sheet1
Table S4: Results of heterogeneity test based on the Mendelian Randomization (MR) analysis
id.exposure	outcome	SYMBOL	Q_pval
eqtl-a-ENSG00000101751	Prostate cancer || id:ebi-a-GCST90018905	POLI	0.574446
eqtl-a-ENSG00000171206		TRIM8	0.499731
