# Supplementary material for: Summary data-based mendelian randomization and single-cell RNA sequencing analyses identify key genes associated with ubiquitination in prostate cancer
Source: Research Square preprint supplement (doi:10.21203/rs.3.rs-7723484/v1), 2025-11-22
Supplement: Supplementary file 3 [file 4b15545eff2947d8d6f8ebd6.xlsx]

## Sheet: Sheet1
Table S2: Results of cell annotation for marker genes
Markergene	Clusters	Cell types
CD3E, CD3D	0,1,13	T cells
KRT18, KRT19	2,3,7,9,11,16	Epithelial cells
CDH5, CLDN5	4,8	Endothelial cells
LYZ, CD68	5,14,17	Macrophages
COL1A1, COL1A2	6,15	Fibroblast
CD79A, IGHM	10	B cells
TPSAB1, KIT	12	MAST cells
