# Supplementary material for: Summary data-based mendelian randomization and single-cell RNA sequencing analyses identify key genes associated with ubiquitination in prostate cancer
Source: Research Square preprint supplement (doi:10.21203/rs.3.rs-7723484/v1), 2025-11-22
Supplement: Supplementary file 4 [file 4d1a9f23e4300e7ed29671fb.xlsx]

## Sheet: Sheet1
Table S5: Results of horizontal pleiotropy test based on the MR analysis
id.exposure	outcome	SYMBOL	pval
eqtl-a-ENSG00000101751	Prostate cancer || id:ebi-a-GCST90018905	POLI	0.554922
eqtl-a-ENSG00000171206		TRIM8	0.720435
