# Supplementary material for: Summary data-based mendelian randomization and single-cell RNA sequencing analyses identify key genes associated with ubiquitination in prostate cancer
Source: Research Square preprint supplement (doi:10.21203/rs.3.rs-7723484/v1), 2025-11-22
Supplement: Supplementary file 5 [file 52b9a28718bbeac15b158e69.xlsx]

## Sheet: Sheet1
Table S6: Results of Steiger test based on the MR analysis
id.exposure	outcome	SYMBOL	correct_causal_direction	steiger_pval
eqtl-a-ENSG00000101751	Prostate cancer || id:ebi-a-GCST90018905	POLI	TRUE	3.91e-259
eqtl-a-ENSG00000171206		TRIM8	TRUE	1.03e-217
