# Supplementary material for: Summary data-based mendelian randomization and single-cell RNA sequencing analyses identify key genes associated with ubiquitination in prostate cancer
Source: Research Square preprint supplement (doi:10.21203/rs.3.rs-7723484/v1), 2025-11-22
Supplement: Supplementary file 6 [file 78c65b29c6bcaaa575035d79.xlsx]

## Sheet: dgidb
Table S7: List of 32 predicted compounds targeting POLI
Gene	Drug	Regulatory approval	Indication	Interaction score
POLI	Selegiline hydrochloride	Approved		0.123257
POLI	Cefuroxime sodium	Approved		0.0616287
POLI	Indigo	Approved		0.049303
POLI	Lornoxicam	Approved		0.049303
POLI	Cefotiam hydrochloride	Approved		0.0410858
POLI	Pentamidine isethionate	Approved		0.0352164
POLI	Epirubicin hydrochloride	Approved		0.0352164
POLI	4-aminophenol	Approved		0.0308144
POLI	Cefotetan	Approved		0.0273905
POLI	Hydroxyzine pamoate	Approved		0.0246515
POLI	Indocyanine green acid form	Approved		0.0246515
POLI	Ampicillin (anhydrous)	Approved		0.0224104
POLI	Cefixime anhydrous	Approved		0.0224104
POLI	Cephapirin sodium	Approved		0.0189627
POLI	Methacycline hydrochloride	Approved		0.0176082
POLI	Cefotaxime sodium	Approved		0.0164343
POLI	Ethacrynic acid	Approved	Antihypertensive Agents; Diuretics	0.0154072
POLI	Methylene blue anhydrous	Approved		0.0129745
POLI	Inamrinone	Approved	Cardiotonic Agents; Phosphodiesterase Inhibitors	0.0129745
POLI	Linolenic acid	Approved		0.0117388
POLI	Montelukast sodium	Approved	antiasthmatic agent	0.0112052
POLI	Methyldopa anhydrous	Approved	Antihypertensive Agents	0.00795209
POLI	Mitoxantrone hydrochloride	Approved		0.00770359
POLI	Norepinephrine	Approved	Antihypotensive Agents; Vasoconstrictor Agents	0.00770359
POLI	Daunorubicin hydrochloride	Approved		0.00747015
POLI	Levodopa	Approved	antiparkinson agent	0.00684764
POLI	Mitoxantrone	Approved	antineoplastic agent	0.00560261
POLI	Masoprocol	Approved		0.00535902
POLI	Idarubicin	Approved	Antineoplastic Agents	0.00513573
POLI	Quercetin	Approved		0.00312044
POLI	Clozapine	Approved	Antipsychotic Agents	0.00254139
POLI	Methotrexate	Approved	DMARD	0.00220103
