# Supplementary material for: Summary data-based mendelian randomization and single-cell RNA sequencing analyses identify key genes associated with ubiquitination in prostate cancer
Source: Research Square preprint supplement (doi:10.21203/rs.3.rs-7723484/v1), 2025-11-22
Supplement: Supplementary file 7 [file d0332bc56c6d583a3faae8e3.xlsx]

## Sheet: Sheet1
Table S1: List of 3,223 ubiquitination-related genes (URGs)
UBA1
A1S9T
UBE1
UBA3
UBE1C
UBA5
UBE1DC1
UBA7
UBE1L
UBE2
UBA6
MOP4
UBE1L2
NAE1
APPBP1
HPP1
SAE1
AOS1
SUA1
UBLE1A
UBA2
SAE2
UBLE1B
HRIHFB2115
ATG7
APG7L
UBE2U
UBE2E3
UBCE4
UBCH9
UBE2V2
MMS2
UEV2
UBE2W
UBC16
UBE2D3
UBC5C
UBCH5C
UBE2J1
NCUBE1
CGI- 76
HSPC153
HSPC205
UBE2E2
UBCH8
BIRC6
KIAA1289
UBE2D2
PUBC1
UBC4
UBC5B
UBCH4
UBCH5B
UBE2G1
UBE2G
UBE2D1
SFT
UBC5A
UBCH5
UBCH5A
UBE2V1
CROC1
UBE2V
UEV1
P/OKcl.19
UBE2A
RAD6A
UFC1
CGI-126
HSPC155
UBE2T
HSPC150
PIG50
UBE2Z
HOYS7
UBE2C
UBCH10
UBE2I
UBC9
UBCE9
UBE2H
UBE2J2
NCUBE2
UBE2G2
UBE2L3
UBCE7
UBCH7
UBE2O
KIAA1734
UBE2N
BLU
UBE2E1
UBCH6
UBE2Q1
NICE5
UBE2Q
PRO3094
UBE2L6
ATG3
APG3
APG3L
ATG10
APG10L
PP12616
UBE2F
NCE2
UBE2Q2
UBE2B
RAD6B
UBE2S
E2EPF
OK/SW- cl.73
UBE2R2
CDC34B
UBC3B
UBE2K
HIP2
LIG
UBE2M
UBC12
TSG101
UBE2D4
UBCH5D
CDC34
UBCH3
UBE2R1
UBE2L5P
hCG_1789360
UBE2NL
RP11-463D19.2
TMEM189-UBE2V1
hCG_2044781
FBXO27
FBG5
FBX27
FBXO17
FBG4
FBX17
FBX26
FBXO26
PCGF2
MEL18
RNF110
ZNF144
ASB2
ATG16L1
APG16L
UNQ9393/PRO34307
UHRF1
ICBP90
NP95
RNF106
BFAR
BAR
RNF47
LRRC41
MUF1
PP7759
SOCS7
NAP4
SOCS6
DCAF7
HAN11
WDR68
FBXW2
FBW2
FWD2
COMMD3-BMI1
BMI1
PCGF4
RNF51
44987
RNF172
HSPC240
TRIM28
KAP1
RNF96
TIF1B
NOSIP
CGI-25
PIAS2
PIASX
RNF213
ALO17
C17orf27
KIAA1554
KIAA1618
MYSTR
RNF115
ZNF364
RNF167
LP2254
ANAPC11
HSPC214
GAN
GAN1
KLHL16
TRAF3
CAP1
CRAF1
DCAF11
WDR23
GL014
PRO2389
TLE3
KIAA1547
WDR61
RNF111
RP11-574F21.3
DCAF8
H326
WDR42A
HECTD1
KIAA1131
G2E3
KIAA1333
HECTD4
C12orf51
KIAA0614
DTX3
RNF154
SKP2
FBXL1
RNF24
ZNRF3
KIAA1133
RNF203
MYCBP2
KIAA0916
PAM
FBXL17
FBL17
FBX13
FBXO13
CDCA3
C8
GRCC8
TOME1
CUL2
WSB2
CDC27
ANAPC3
D0S1430E
D17S978E
RNF170
TRAF6
RNF85
TRIM3
BERP
RNF22
RNF97
SPSB2
GRCC9
SSB2
RHOBTB2
DBC2
KIAA0717
RNF217
C6orf172
IBRDC1
RNF130
UBR5
EDD
EDD1
HYD
KIAA0896
RNF19A
RNF19
TCEB1
ELOC
WWP1
FBXO32
RNF150
KIAA1214
FBXO8
FBS
FBX8
DC10
UNQ1877/PRO4320
RACK1
GNB2L1
HLC7
PIG21
ANAPC13
NEDD4
KIAA0093
NEDD4-1
PIG53
ANAPC10
APC10
MIB2
SKD
ZZANK1
FBXL7
FBL6
FBL7
KIAA0840
KCTD7
RABGEF1
RABEX5
UCHL1
44986
RNF171
CIAO1
WDR39
RNF182
FBXL2
FBL2
FBL3
BTBD9
KIAA1880
ASB11
DCUN1D2
C13orf17
DCUN1L2
AMBRA1
KIAA1736
44995
RNF190
RNF5
G16
NG2
RMA1
ANAPC7
APC7
ASB15
TRIM51
SPRYD5
CADPS2
CAPS2
KIAA1591
PEX10
RNF69
TRIM31
C6orf13
RNF
HERC1
NLE1
HUSSY-07
CBLL1
HAKAI
RNF188
TRIM26
RNF95
ZNF173
TRIM40
RNF35
TRIM27
RFP
RNF76
RFPL4A
RFPL4
RNF210
UBE3B
FBXO10
FBX10
PRMT11
CHFR
RNF196
KBTBD13
TRIM73
TRIM50B
TBL1XR1
IRA1
TBLR1
RNF216
TRIAD3
UBCE7IP1
ZIN
DCAF1
VPRBP
KIAA0800
RIP
KMT2B
HRX2
KIAA0304
MLL2
MLL4
TRX2
WBP7
FBXO15
FBX15
BRAP
RNF52
RING1
RNF1
WDR26
CDW2
MIP2
PRO0852
TRIM39
RNF23
TFP
PWP1
TCEB2
ELOB
KCMF1
FIGC
ZZZ1
CUL1
44992
AXOT
RNF177
RNF43
PPARA
NR1C1
PPAR
GPR75-ASB3
ASB3
KCTD6
CUL4B
KIAA0695
FBXO11
FBX11
PRMT9
VIT1
UG063H01
HERC3
KIAA0032
NEDD4L
KIAA0439
NEDL3
MGRN1
KIAA0544
RNF156
MAP3K1
MAPKKK1
MEKK
MEKK1
TTC3
DCRR1
RNF105
TPRD
TMF1
ARA160
CCNB1IP1
C14orf18
HEI10
UBE3A
E6AP
EPVE6AP
HPVE6A
CIS4
SOCS4
PLAA
PLAP
PAFAH1B1
LIS1
MDCR
MDS
PAFAHA
SMU1
CCNF
FBX1
FBXO1
ING4
My036
HECW1
KIAA0322
NEDL1
44993
MIR
RNF178
FBXW10
HERC4
KIAA1593
FZR1
CDH1
FYR
FZR
KIAA1242
CDC23
ANAPC8
RNF14
ARA54
HRIHFB2038
SPOP
CUL5
VACM1
TRIM37
KIAA0898
MUL
POB1
PIAS3
RNF13
RZF
RNF208
KMT2A
ALL1
CXXC7
HRX
HTRX
MLL
MLL1
TRX1
LTN1
C21orf10
C21orf98
KIAA0714
RNF160
ZNF294
HSPC087
RNF20
BRE1A
RNF180
TRIM71
LIN41
TMEM129
DCAF16
C4orf30
CREBBP
CBP
KLHL42
KIAA1340
KLHDC5
MID1
FXY
RNF59
TRIM18
XPRF
ASB9
FBXL19
FBL19
FUS
TLS
TRIM6
RNF89
RBBP7
RBAP46
TRIM54
MURF
MURF3
RNF30
TRIM5
RNF88
FBXO18
FBH1
FBX18
RHOBTB3
KIAA0878
TRIM22
RNF94
STAF50
ARIH1
ARI
MOP6
UBCH7BP
HUSSY-27
KATNB1
NFX1
NFX2
KBTBD7
RCBTB1
CLLD7
E4.5
DCAF10
WDR32
KLHL21
KIAA0469
SYVN1
HRD1
KIAA1810
KDM2B
CXXC2
FBL10
FBXL10
JHDM1B
PCCX2
FBXO6
FBG2
FBS2
FBX6
TLE1
ING1
FBXO42
FBX42
JFK
KIAA1332
CUL4A
DCAF17
C2orf37
UBR4
KIAA0462
KIAA1307
RBAF600
ZUBR1
RNF186
PJA1
RNF70
TRIM63
IRF
MURF1
RNF28
SMRZ
CDC26
ANAPC12
C9orf17
TRIM32
HT2A
RC3H2
MNAB
RNF164
RBBP4
RBAP48
RNF8
KIAA0646
RNF19B
IBRDC3
NKLAM
UBR2
C6orf133
KIAA0349
NEURL2
C20orf163
HECTD3
RNF113A
RNF113
ZNF183
AURKA
AIK
AIRK1
ARK1
AURA
AYK1
BTAK
IAK1
STK15
STK6
XIAP
API3
BIRC4
IAP3
RWDD3
RSUME
BTRC
BTRCP
FBW1A
FBXW1A
PCGF6
MBLR
RNF134
TAF5
TAF2D
NEURL1B
NEURL3
UBE3D
C6orf157
H10BH
UBE2CBP
UFL1
KIAA0776
NLBP
RCAD
FBXL4
FBL4
FBL5
RNF146
RC3H1
KIAA2025
RNF198
RFWD2
COP1
RNF200
RNF2
BAP1
DING
HIPI3
RING1B
SHPRH
KIAA2023
KLHL12
C3IP1
MDM4
MDMX
DTL
CDT2
CDW1
DCAF2
L2DTL
RAMP
PARK2
PRKN
FBXO28
CENP-30
KIAA0483
TRIM17
RBCC
RNF16
TERF
PCGF3
RNF3
RNF3A
ASB12
RNF121
DZIP3
KIAA0675
NSMCE1
HSPC333
HSPC337
DCAF12
KIAA1892
TCC52
WDR40A
RNF34
PJA2
KIAA0438
RNF131
SMURF1
KIAA1625
RFWD3
RNF201
TOPORS
LUN
TP53BPL
WWP2
KLHL9
KIAA1354
44990
RNF153
PELI1
PRISM
ZBTB18
RP58
TAZ1
ZNF238
WDR5
BIG3
ARNT
BHLHE2
TRIM33
KIAA1113
RFG7
TIF1G
DCAF4
WDR21
WDR21A
ZC3HC1
NIPA
HSPC216
BRCA1
RNF53
RICTOR
KIAA1999
TRIM38
RNF15
RORET
PEX2
PAF1
PMP3
PMP35
PXMP3
RNF72
MYLIP
BZF1
IDOL
BM-023
PP5242
SIAH1
HUMSIAH
ARIH2
ARI2
TRIAD1
HT005
AREL1
KIAA0317
RBCK1
C20orf18
RNF54
UBCE7IP3
XAP3
XAP4
TRIM13
LEU5
RFP2
RNF77
TRIM4
RNF87
FBXL3
FBL3A
FBXL3A
RNF220
C1orf164
TRIM6-TRIM34
TRIM34
IFP1
RNF21
FBXO2
FBX2
FBXO25
FBX25
CISH
G18
MALT1
MLT
UBE3C
KIAA0010
KIAA10
RBBP6
P2PR
PACT
RBQ1
My038
RNF6
SPG2
HDAC4
KIAA0288
RNF41
FLRF
NRDP1
SBBI03
TRIM24
RNF82
TIF1
TIF1A
UBE4B
HDNB1
KIAA0684
UFD2
HUWE1
KIAA0312
KIAA1578
UREB1
HSPC272
DCAF5
BCRG2
KIAA1824
WDR22
FBXL5
FLR1
ANAPC1
TSG24
NHLRC1
EPM2B
SOCS2
CIS2
SSI2
STATI2
NUP43
RNF133
KCTD21
TRAF3IP2
C6orf2
C6orf4
C6orf5
C6orf6
FBXL14
FBL14
KLHL7
TRIM2
KIAA0517
RNF86
KLHL17
FBXO40
FBX40
KIAA1195
RHOBTB1
KIAA0740
PCGF5
RNF159
ZNRF1
NIN283
PPIL2
TRIM46
TRIFIC
ZMIZ1
KIAA1224
RAI17
ZIMP10
KCTD11
C17orf36
REN
BRWD1
C21orf107
WDR9
TRIM50
TRIM50A
ASB7
RLIM
RNF12
WDR53
HOXB4
HOX2F
44996
SOCS1
SSI1
TIP3
FBXL6
TRAIP
RNF206
TRIP
FBXW4
FBW4
SHFM3
SOCS3
CIS3
SSI3
WDR5B
KLHL22
RNF135
L13
SPSB1
SSB1
RNF123
KPC1
FP1477
TRAF7
RFWD1
RNF119
RNF185
RNF10
KIAA0262
RIE2
ASB4
FBXW5
FBW5
PP3971
RNF40
BRE1B
KIAA0661
RCHY1
ARNIP
CHIMP
PIRH2
RNF199
ZNF363
DTX2
KIAA1528
RNF58
DCUN1D3
SCCRO3
RNF31
ZIBRA
HOIP
ANAPC2
APC2
KIAA1406
ZNF645
LRSAM1
TAL
UNQ6496/PRO21356
ZNRF2
RNF202
TRIM72
MG53
PELI3
WDTC1
KIAA1037
KLHL11
RNF168
ASB8
PP14212
TRIM25
EFP
RNF147
ZNF147
ZFP91
ZNF757
FKSG11
CNOT4
NOT4
ANAPC4
APC4
RFFL
RNF189
RNF34L
TRIM41
RINCK
RNF4
SNURF
RES4-26
POC1B
WDR51B
SIAH2
RNF166
RNF152
SART1
DCAF6
IQWD1
MSTP055
FBXO31
FBX14
FBX31
PP2386
FBXO45
FBX45
RNF26
CDC20
SPSB4
SSB4
VPS41
HLTF
HIP116A
RNF80
SMARCA3
SNF2L3
ZBU1
MSL2
KIAA1585
MSL2L1
RNF184
FBXW8
FBW6
FBW8
FBX29
FBXO29
FBXW6
TRIM59
RNF104
TRIM57
TSBF1
KLHL3
KIAA1129
SH3RF3
POSH2
SH3MD4
ZMIZ2
KIAA1886
ZIMP7
HRIHFB2007
KCTD13
BACURD1
PDIP1
POLDIP1
FKSG86
PP6832
44988
RNF173
PDLIM2
PP6345
FBXO22
FBX22
FEM1B
F1AA
KIAA0396
SOCS5
CIS6
CISH5
CISH6
KIAA0671
RNF181
HSPC238
TRIM56
RNF109
RNF187
RNFT1
PTD016
TRIM35
HLS5
KIAA1098
RNF139
TRC8
GNB2
TRIM8
GERP
RNF27
WDR48
KIAA1449
UAF1
IRF2BP1
DDB1
XAP1
KCTD5
E4F1
E4F
TRIM68
GC109
RNF137
SS56
RAG1
RNF74
TRIM9
KIAA0282
RNF91
LRR1
PPIL5
FBXO33
FBX33
HECTD2
DCAF13
WDSOF1
HSPC064
WDR82
TMEM113
WDR82A
UNQ9342/PRO34047
DTX3L
BBAP
RNF25
ZSWIM2
ZZZ2
SLX4
BTBD12
KIAA1784
KIAA1987
BCL6B
BAZF
ZNF62
KLHL10
DCUN1D1
DCUN1L1
RP42
SCCRO
NACC1
BTBD14B
NAC1
RNF126
AIRE
APECED
TRIM62
MED8
UBR1
AMFR
RNF45
STC1
STC
PPARG
NR1C3
KLHL40
KBTBD5
SRYP
NSMCE2
C8orf36
MMS21
TRIM74
TRIM50C
KLHL41
KBTBD10
KRP1
SH3RF1
KIAA1494
POSH
RNF142
SH3MD2
TRIM11
RNF92
TRIP12
KIAA0045
ULF
RANBP2
NUP358
TRIM36
RBCC728
RNF98
FBXW7
FBW7
FBX30
SEL10
FBXO4
FBX4
ASB6
UHRF2
NIRF
RNF107
PHIP
WDR11
44991
KIAA0597
RNF176
TEB4
KLHL8
KIAA1378
RNF7
RBX2
ROC2
SAG
44989
KIAA1399
RNF174
TRIM43
CBLC
CBL3
RNF57
CBX4
TRIM65
PML
MYL
PP8675
RNF71
TRIM19
PELI2
RNF113B
RNF161
ZNF183L1
44994
RNF179
FBXO7
FBX7
RNF141
ZNF230
ANKIB1
KIAA1386
FBXO3
FBX3
CUL7
KIAA0076
FBXW11
BTRCP2
FBW1B
FBXW1B
KIAA0696
ERCC8
CKN1
CSA
RAD18
RNF73
FBXL20
ASB1
KIAA1146
PHRF1
KIAA1542
RBBP5
RBQ3
CUL3
KIAA0617
HERC5
CEB1
CEBP1
HERC6
MUL1
C1orf166
GIDE
MAPL
MULAN
RNF218
CBLB
RNF56
Nbla00127
CBL
CBL2
RNF55
LNX1
LNX
PDZRN2
UNQ574/PRO1136
WDR76
KAT2B
PCAF
SNRNP40
PRP8BP
SFP38
WDR57
PDZRN3
KIAA1095
LNX3
SEMCAP3
BIRC3
API2
MIHC
RNF49
EED
EP300
P300
PIAS4
PIASG
TLE2
HACE1
KIAA1320
MID2
FXY2
RNF60
TRIM1
KLHL13
BKLHD2
KIAA1309
ITCH
SMURF2
WSB1
SWIP1
WDR59
KIAA1923
FP977
ANAPC5
APC5
HERC2
RNF138
NARF
HSD-4
HSD4
MIB1
DIP1
KIAA1323
ZZANK2
TRAF5
RNF84
MNAT1
CAP35
MAT1
RNF66
WDR12
HECW2
KIAA1301
NEDL2
BARD1
DCUN1D5
RNF144B
IBRDC2
P53RFP
TRIM15
RNF93
ZNF178
ZNFB7
RNF38
MDM2
DTX1
DDB2
TRIM45
RNF99
VHL
RNF122
MKRN1
RNF61
RNF128
TRIM47
GOA
RNF100
TRIM21
RNF81
RO52
SSA1
DCAF15
C19orf72
GRWD1
GRWD
KIAA1942
WDR28
CDC16
ANAPC6
UBE4A
KIAA0126
CUL9
H7AP1
KIAA0708
PARC
TRPC4AP
C20orf188
TRRP4AP
FBXO44
FBG3
FBX44
FBX6A
FBXO6A
CORO7
PIAS1
DDXBP1
RAB40C
RARL
RASL8C
FBXL12
FBL12
TRAF2
TRAP3
FBXO9
FBX9
VCIA1
RNF114
ZNF228
ZNF313
RNF11
CGI-123
AHR
BHLHE76
IRF2BPL
C14orf4
EAP1
KIAA1865
My039
RNF103
ZFP103
TNFAIP3
OTUD7C
A20
FBXO30
FANCL
PHF9
PCGF1
NSPC1
RNF68
ABTB1
BPOZ
PP2259
CRBN
AD-006
TRIM23
ARD1
ARFD1
RNF46
BIRC2
API1
MIHB
RNF48
PRPF19
NMP200
PRP19
SNEV
DTX4
KIAA0937
RNF155
KLHL2
TNFAIP1
BACURD2
EDP1
PEX12
PAF3
FBXL15
FBXO37
ZNRF4
RNF204
VPS18
KIAA1475
STUB1
CHIP
PP1131
TBL1X
TBL1
RNF125
UBOX5
KIAA0860
RNF37
UBCE7IP5
UIP5
BIRC7
KIAP
LIVIN
MLIAP
RNF50
UNQ5800/PRO19607/PRO21344
CSTF1
RBX1
RNF75
ROC1
RASD2
TEM2
KLHL20
KLEIP
OSTM1
GL
HSPC019
UNQ6098/PRO21201
KEAP1
INRF2
KIAA0132
KLHL19
FBXL21
FBL21
FBXL3B
FBXL3P
RNF144A
KIAA0161
RNF144
UBCE7IP4
KLHL33
BTBD8
IBTK
BTKI
KIAA1417
PHF14
CH507-9B2.5
LOC102724159
DNAI1
WDR38
BTBD7
KIAA1525
TRIM52
RNF102
C17orf78
CFAP57
ZBTB8B
ZBTB25
C14orf51
KUP
ZNF46
RNF225
MED16
FBXW9
FBW9
EML2
EMAP2
EMAPL2
WDR18
DNAI2
TRIM16
EBBP
CORO7-PAM16
RAB40B
SEC4L
RNF151
BOP1
KIAA0124
TBL3
SAZD
CORO2B
KIAA0925
KLHL36
C16orf44
UTP4
GTF3C1
WDR72
TRIM69
RNF36
HSD-34
HSD34
NEDD1
DPF3
BAF45C
CERD4
ZBTB42
WDR25
EML5
ZBTB1
KIAA0997
NWD1
NUP37
APAF1
KIAA0413
WDR90
PAAF1
CHD4
DMXL2
KIAA0856
KDM5D
HY
HYA
JARID1D
KIAA0234
SMCY
KLHL35
DMXL1
ZBTB7C
APM1
ZBTB36
ZNF857C
KBTBD4
EML3
WDR74
NSA1
KDM2A
CXXC8
FBXL11
JHDM1A
KIAA1004
RAE1
ZBTB44
KBTBD3
BKLHD3
DENND3
RNF145
FBXL8
LDB2
hCG_1811661
ZBTB38
FAM53C
JADE1
KIAA1807
PHF17
TRIM60
RNF129
RNF33
GTF2H2C
GTF2H2C_2
GTF2H2D
ZNF131
UTP15
WHSC1
NSD2
KIAA1090
MMSET
TRX5
WDR36
SEC31A
WDR1
PLRG1
SRM
KLHL29
KBTBD9
KIAA1921
RP11-432B6.3
RP1-27O5.3
SSR3
ZBTB20
DPZF
ZNF288
WDR86
MAPKBP1
JNKBP1
KIAA0596
RNF39
HZFW
RP11-385D13.1
PPP2R2D
KIAA1541
RNF223
LINCR
DCAF8L2
WDR42C
BTBD19
NBEAL2
KIAA0540
UNQ253/PRO290
NBEAL1
ALS2CR16
ALS2CR17
TRIM10
RFB30
RNF9
WDR27
WDR87
AAMP
hCG_16292
ELP2
STATIP1
DCAF8L1
WDR42B
RFPL4B
RNF211
NSD1
ARA267
KMT3B
CPNE1
BTBD18
ABTB2
RNF148
RNF212
ZBTB22
BING1
ZBTB22A
ZNF297
WRAP53
TCAB1
WDR79
RCBTB2
ZBTB10
RINZF
RINZFC
PHF1
PCL1
NSMAF
FAN
WDR20
KIF21B
KIAA0449
NUP62
CORO1C
CRN2
CRNN4
WDR83
MORG1
TCEB3
ELOA
MSTP059
PHF21A
BHC80
KIAA1696
BM- 006
ZBTB7B
ZBTB15
ZFP67
ZNF857B
TRIM48
RNF101
KBTBD8
KIAA1842
TAKRP
WDR81
KLHL30
WDR60
HIC2
HRG22
KIAA1020
ZBTB30
WDR43
KIAA0007
UTP5
KLHL31
BKLHD6
KBTBD1
KLHL
BCL6
BCL5
LAZ3
ZBTB27
ZNF51
BTBD3
KIAA0952
KBTBD12
KLHDC6
KCTD17
PDZRN4
LNX4
SEMCAP3L
TRIM66
EML4
WDR62
C19orf14
WDR47
KIAA0893
EFCAB8
RNF212B
C14orf164
SEH1L
SEC13L
SEH1
KDM5A
JARID1A
RBBP2
RBP2
RNF222
TSSC1
LONRF1
RNF191
KDM7A
JHDM1D
KDM7
KIAA1718
DYNC1I2
DNCI2
DNCIC2
IPP
KLHL27
CDRT1
C17orf1
C17orf1A
HREP
WDR6
DIDO1
C20orf158
DATF1
KIAA0333
ZBTB9
WDR89
C14orf150
MSTP050
ZBTB3
INTS12
PHF22
SBBI22
RSPRY1
KIAA1972
UNQ328/PRO444
PPP2R2B
AC026348.1
CFAP44
WDR52
LONRF2
RNF192
BTBD6
BDPL
LLGL2
WDR45B
WDR45L
WIPI3
STRN4
LYST
CHS
CHS1
ASB14
SEC13
D3S1231E
SEC13L1
SEC13R
TBL1Y
BAZ1A
ACF1
WCRF180
HSPC317
RNF215
KLHL5
NOL10
CDC20B
G6VTS76519
ZBTB4
KIAA1538
CHD3
NBEA
BCL8B
KIAA1544
LYST2
PAK1IP1
PIP1
WDR84
KLHL34
KBTBD6
GNB1
FBXO48
FBX48
KLHL1
KIAA1490
ZBTB48
HKR3
TZAP
ZNF855
WDR13
TLE4
GRG4
KIAA1261
ZBTB17
MIZ1
ZNF151
ZNF60
ZBTB40
KIAA0478
KDM5C
DXS1272E
JARID1C
SMCX
XE169
PRPF4
PRP4
WDR31
ZBTB6
ZID
ZNF482
EIF3I
EIF3S2
TRIP1
ZBTB8A
BOZF1
ZBTB43
KIAA0414
ZBTB22B
ZNF297B
BRWD3
KLHL4
KIAA1687
WDR34
NACC2
BTBD14A
NAC2
RBB
LONRF3
RNF127
DCAF12L1
WDR40B
WDR78
SEC31B
SEC31L2
MTF2
PCL2
KLHL32
BKLHD5
KIAA1900
CDC40
EHB3
PRP17
PRPF17
BUB3
COPA
AHI1
ZBTB37
IVNS1ABP
ARA3
FLARA3
KIAA0850
NS1
NS1BP
HSPC068
ZBTB41
FRBZ1
KDM5B
JARID1B
PLU1
RBBP2H1
TMEM183A
C1orf37
TAF5L
PAF65B
WDR64
TRIM58
KIF21A
KIAA1708
KIF2
WDHD1
AND1
DCAF12L2
WDR40C
WDSUB1
WDSAM1
GTF3C2
KIAA0011
IFT172
KIAA1179
KLHL14
KIAA1384
PHF2
CENP-35
KIAA0662
SH3RF2
PPP1R39
RNF158
SETMAR
WDR55
WDR37
KIAA0982
PHF8
KIAA1111
ZNF422
STRN3
GS2NA
SG2NA
CCRL2
ZBTB14
ZFP161
ZNF478
PIK3R4
VPS15
EML6
EML5L
WDR88
PQWD
DPF1
BAF45B
NEUD4
KLHL28
BTBD5
hCG_20873
ZBTB45
ZNF499
WDR91
HSPC049
SKP1
EMC19
OCP2
SKP1A
TCEB1L
CFAP52
WDR16
WDRPUH
MYNN
OSZF
ZBTB31
SBBIZ1
WDR3
WDR54
RNF175
CORO6
PP1009
PP1782
PP1881
TAF3
CORO2A
IR10
WDR2
ATG5
APG5L
ASP
CORO1B
KLHL6
MIOS
BAZ1B
WBSC10
WBSCR10
WBSCR9
WSTF
PHF10
BAF45A
GZF1
ZBTB23
ZNF336
KLHL25
ENC2
ZBTB49
ZNF509
ZBTB16
PLZF
ZNF145
PPP2R2C
CCIN
EML1
EMAP1
EMAPL
EMAPL1
COPB2
TRIML1
RNF209
SPAG16
PF20
WDR4
GNB1L
GY2
KIAA1645
WDR14
FKSG1
TRIM61
KLHL15
KIAA1677
ZBTB33
KAISO
ZNF348
IFT80
KIAA1374
WDR56
THOC6
WDR58
PSEC0006
AHCTF1
ELYS
TMBS62
MSTP108
KLHL38
C8orfK36
[truncated: 1,224 more rows]
